# Supplementary material
Source: PubMed Central journal article supplement (PMC3879983)
Supplement: supp_evt197_Supplementary_File_2a.pdf [file supp_evt197_Supplementary_File_2a.pdf]

# Enolase

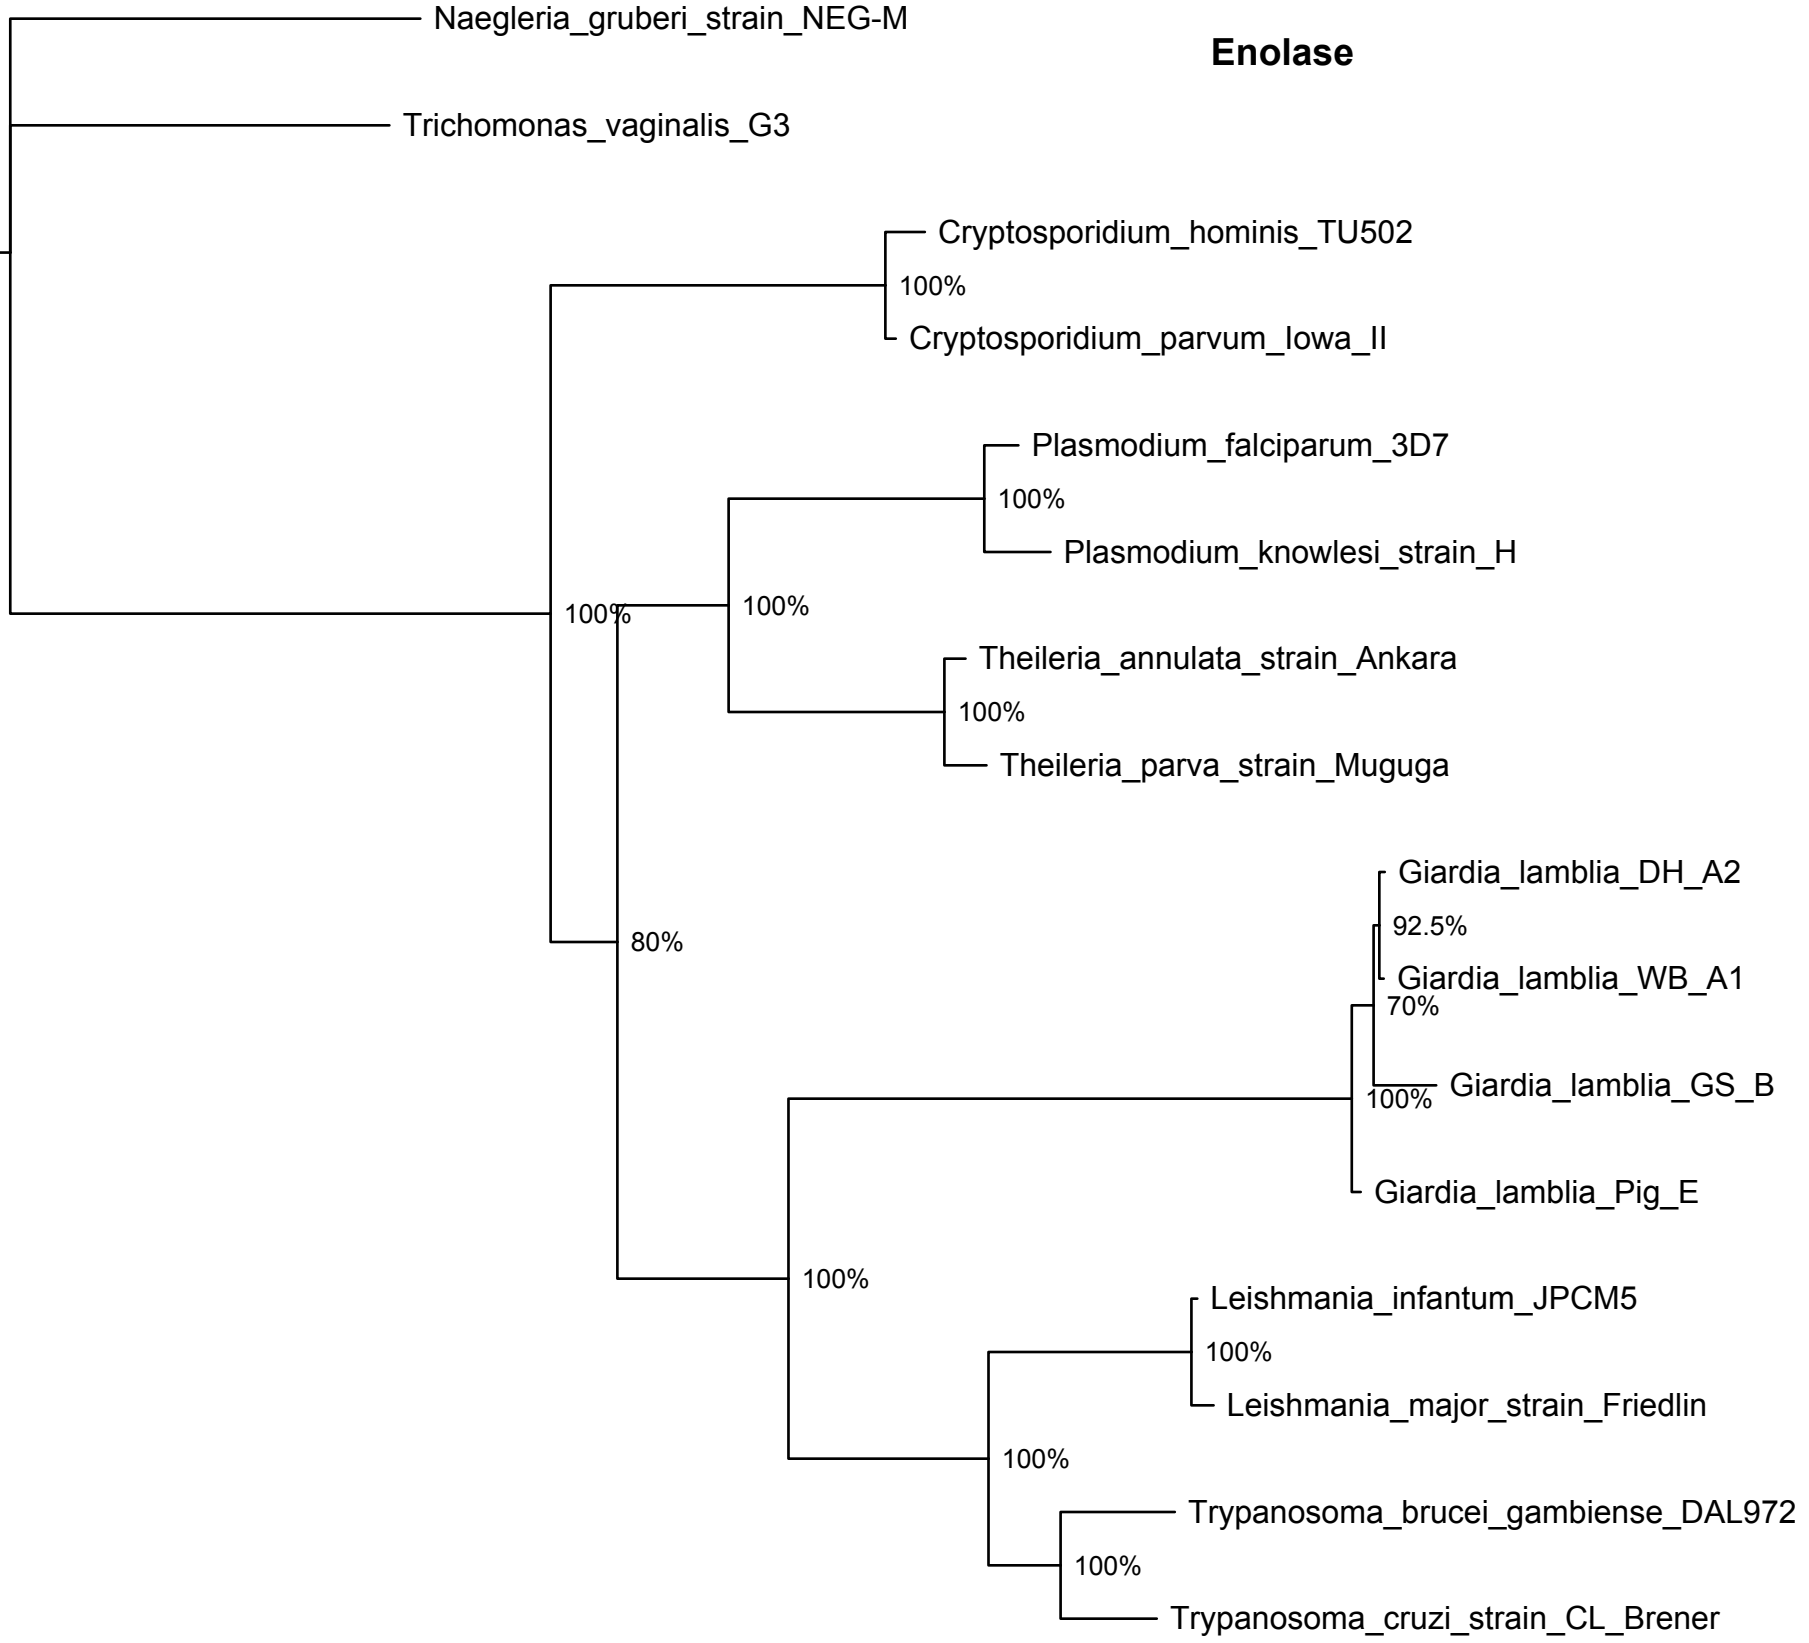

# DNA Topoisomerase II

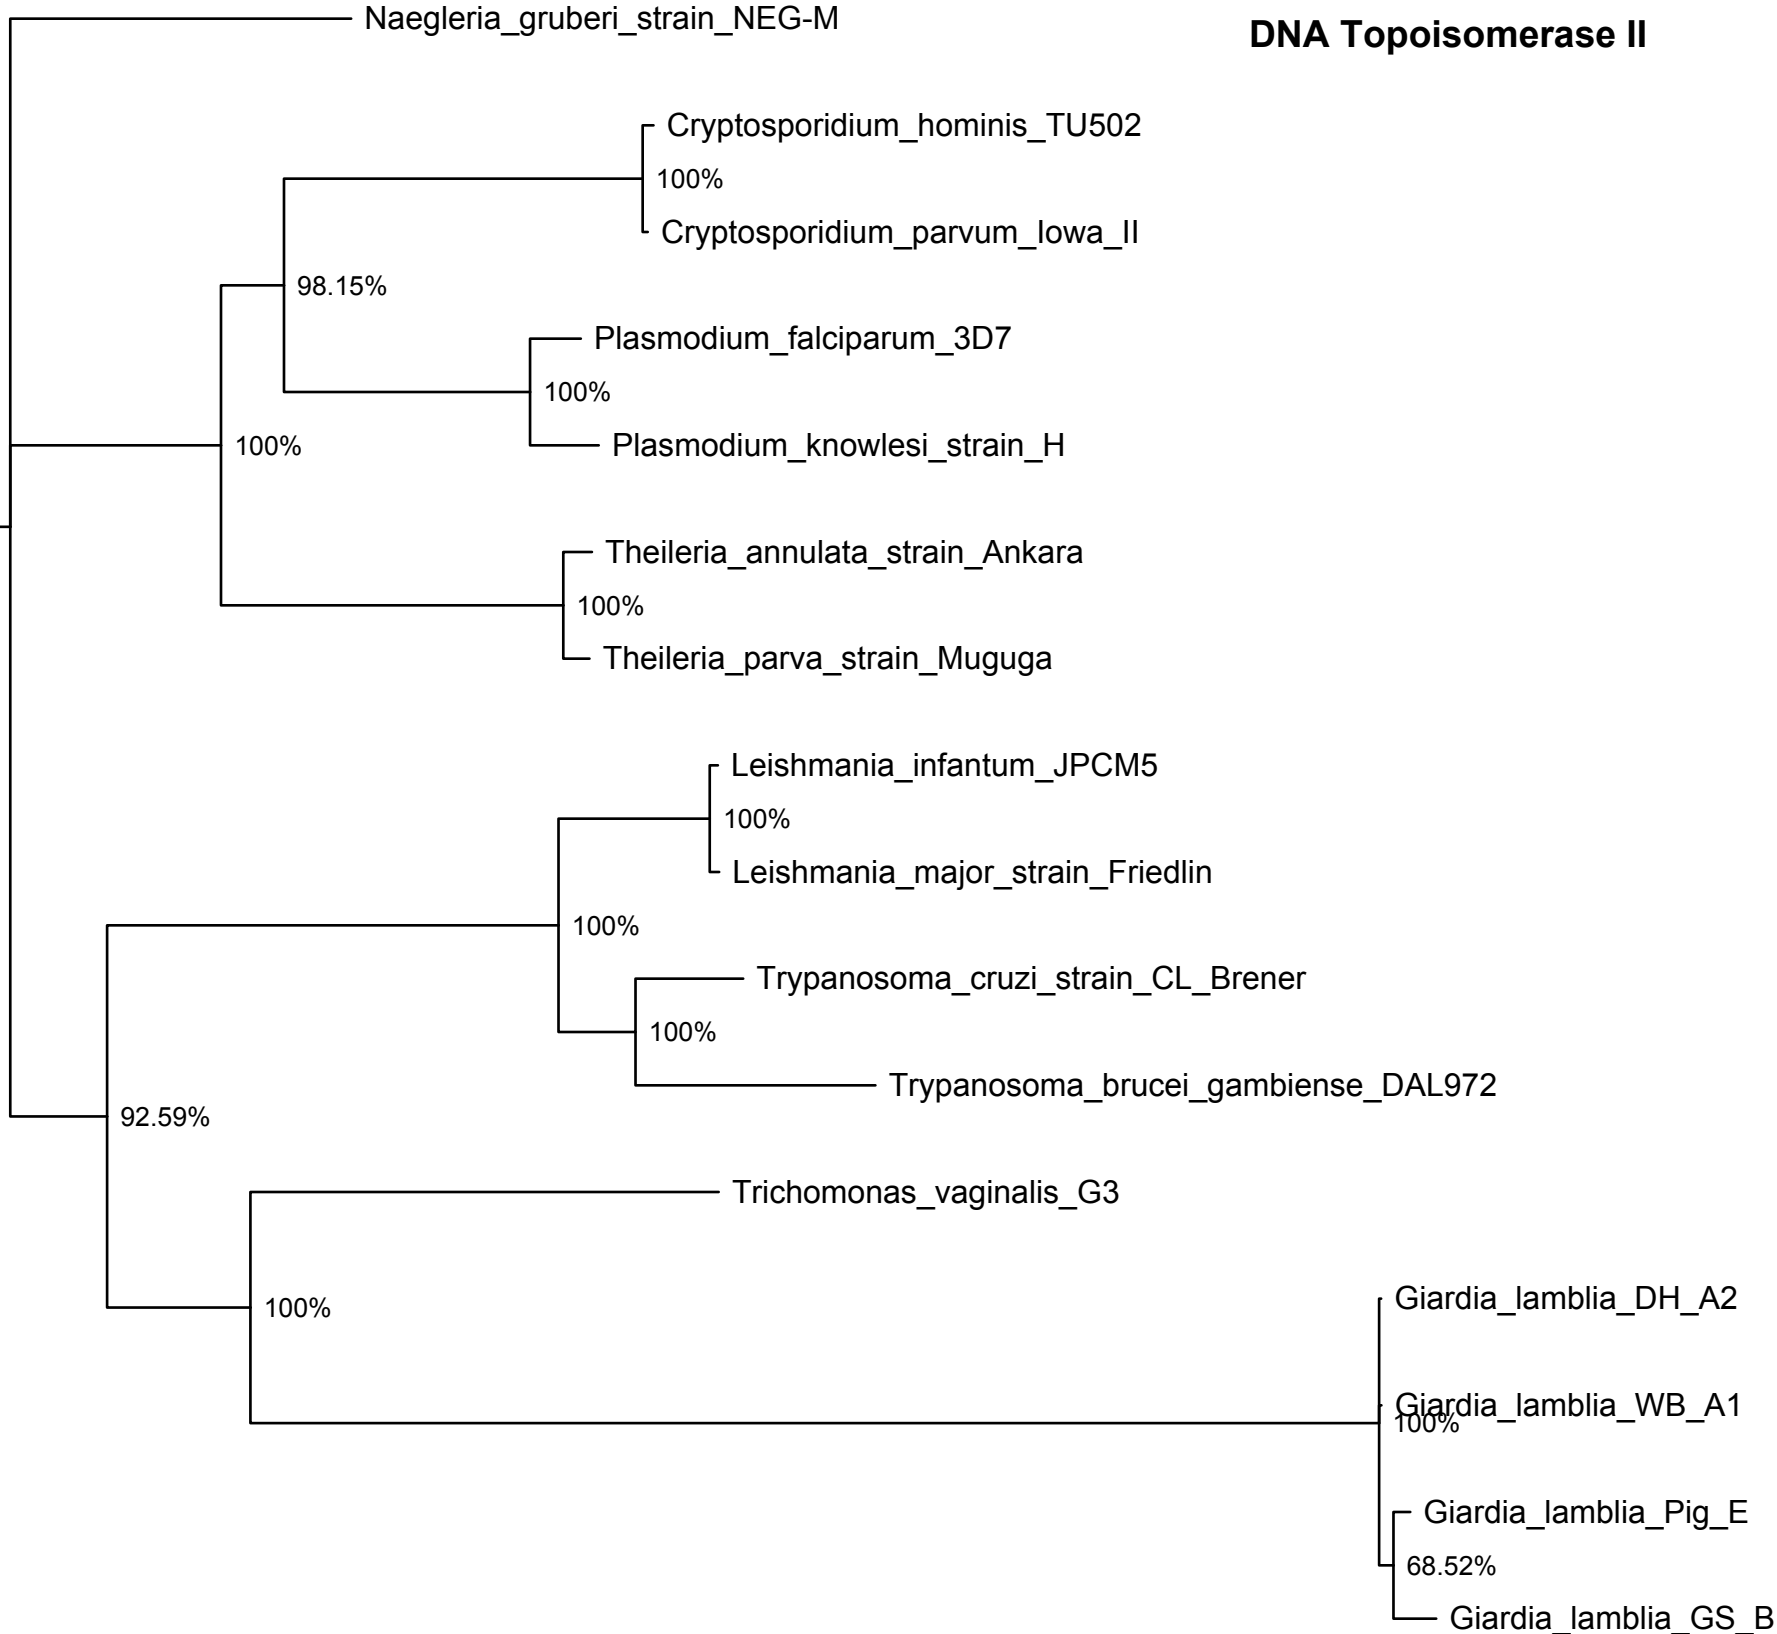

0.3

# DNA Topoisomerase III

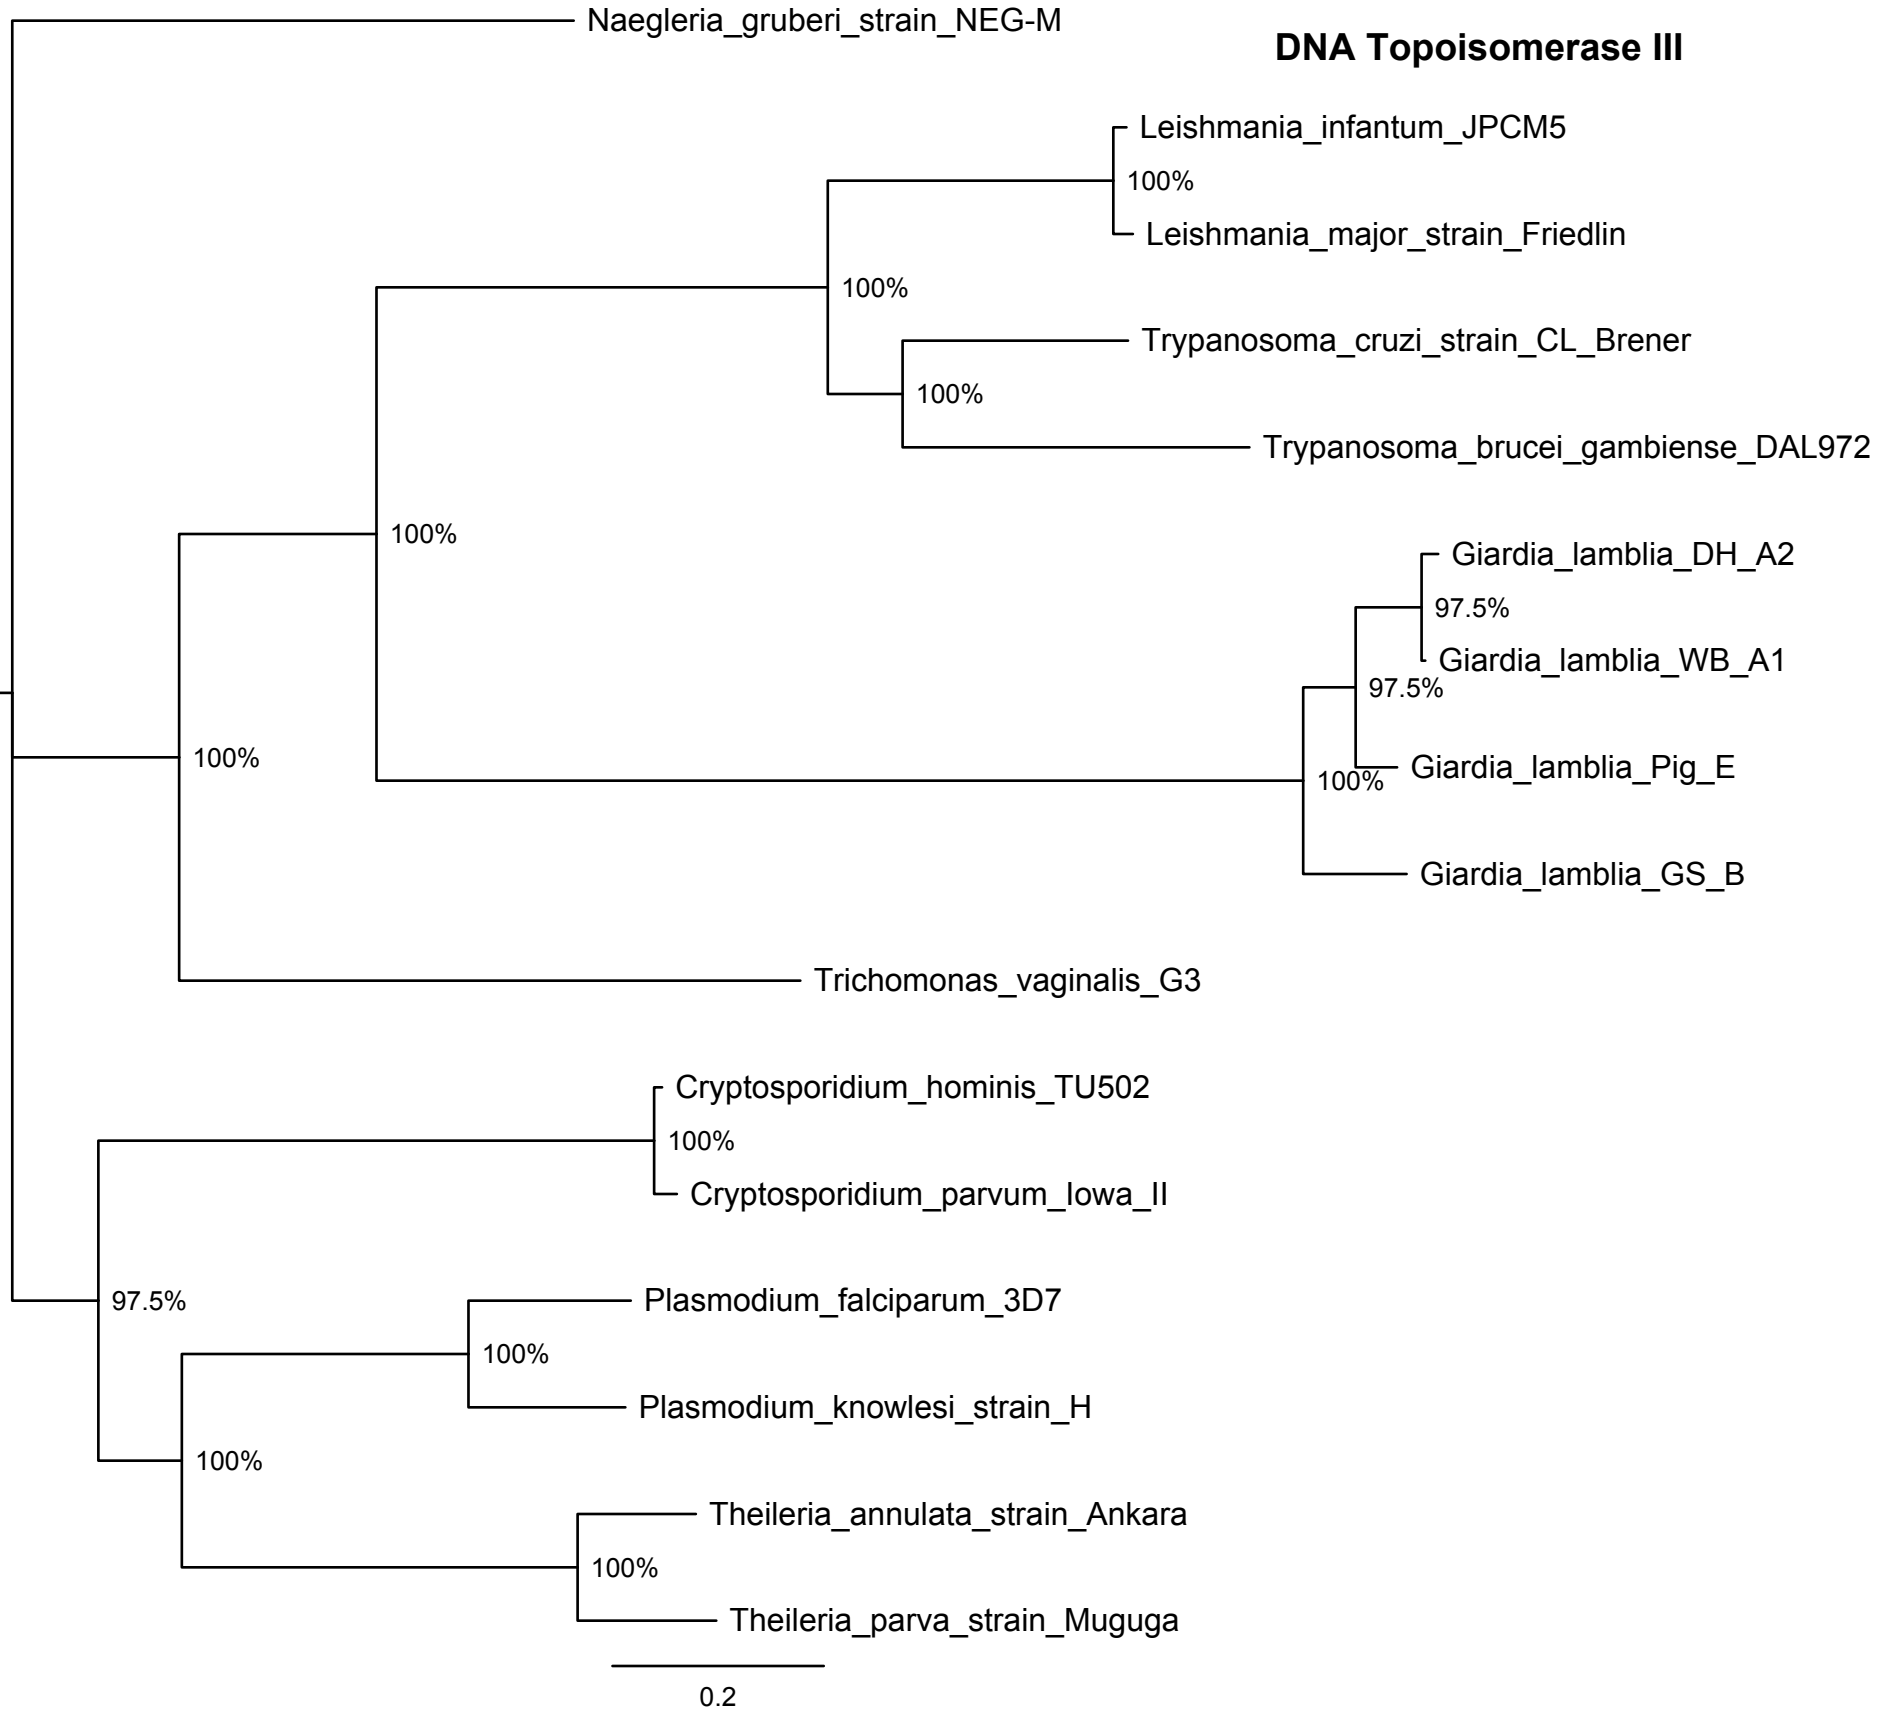

# Protein Elongation Factor 1A

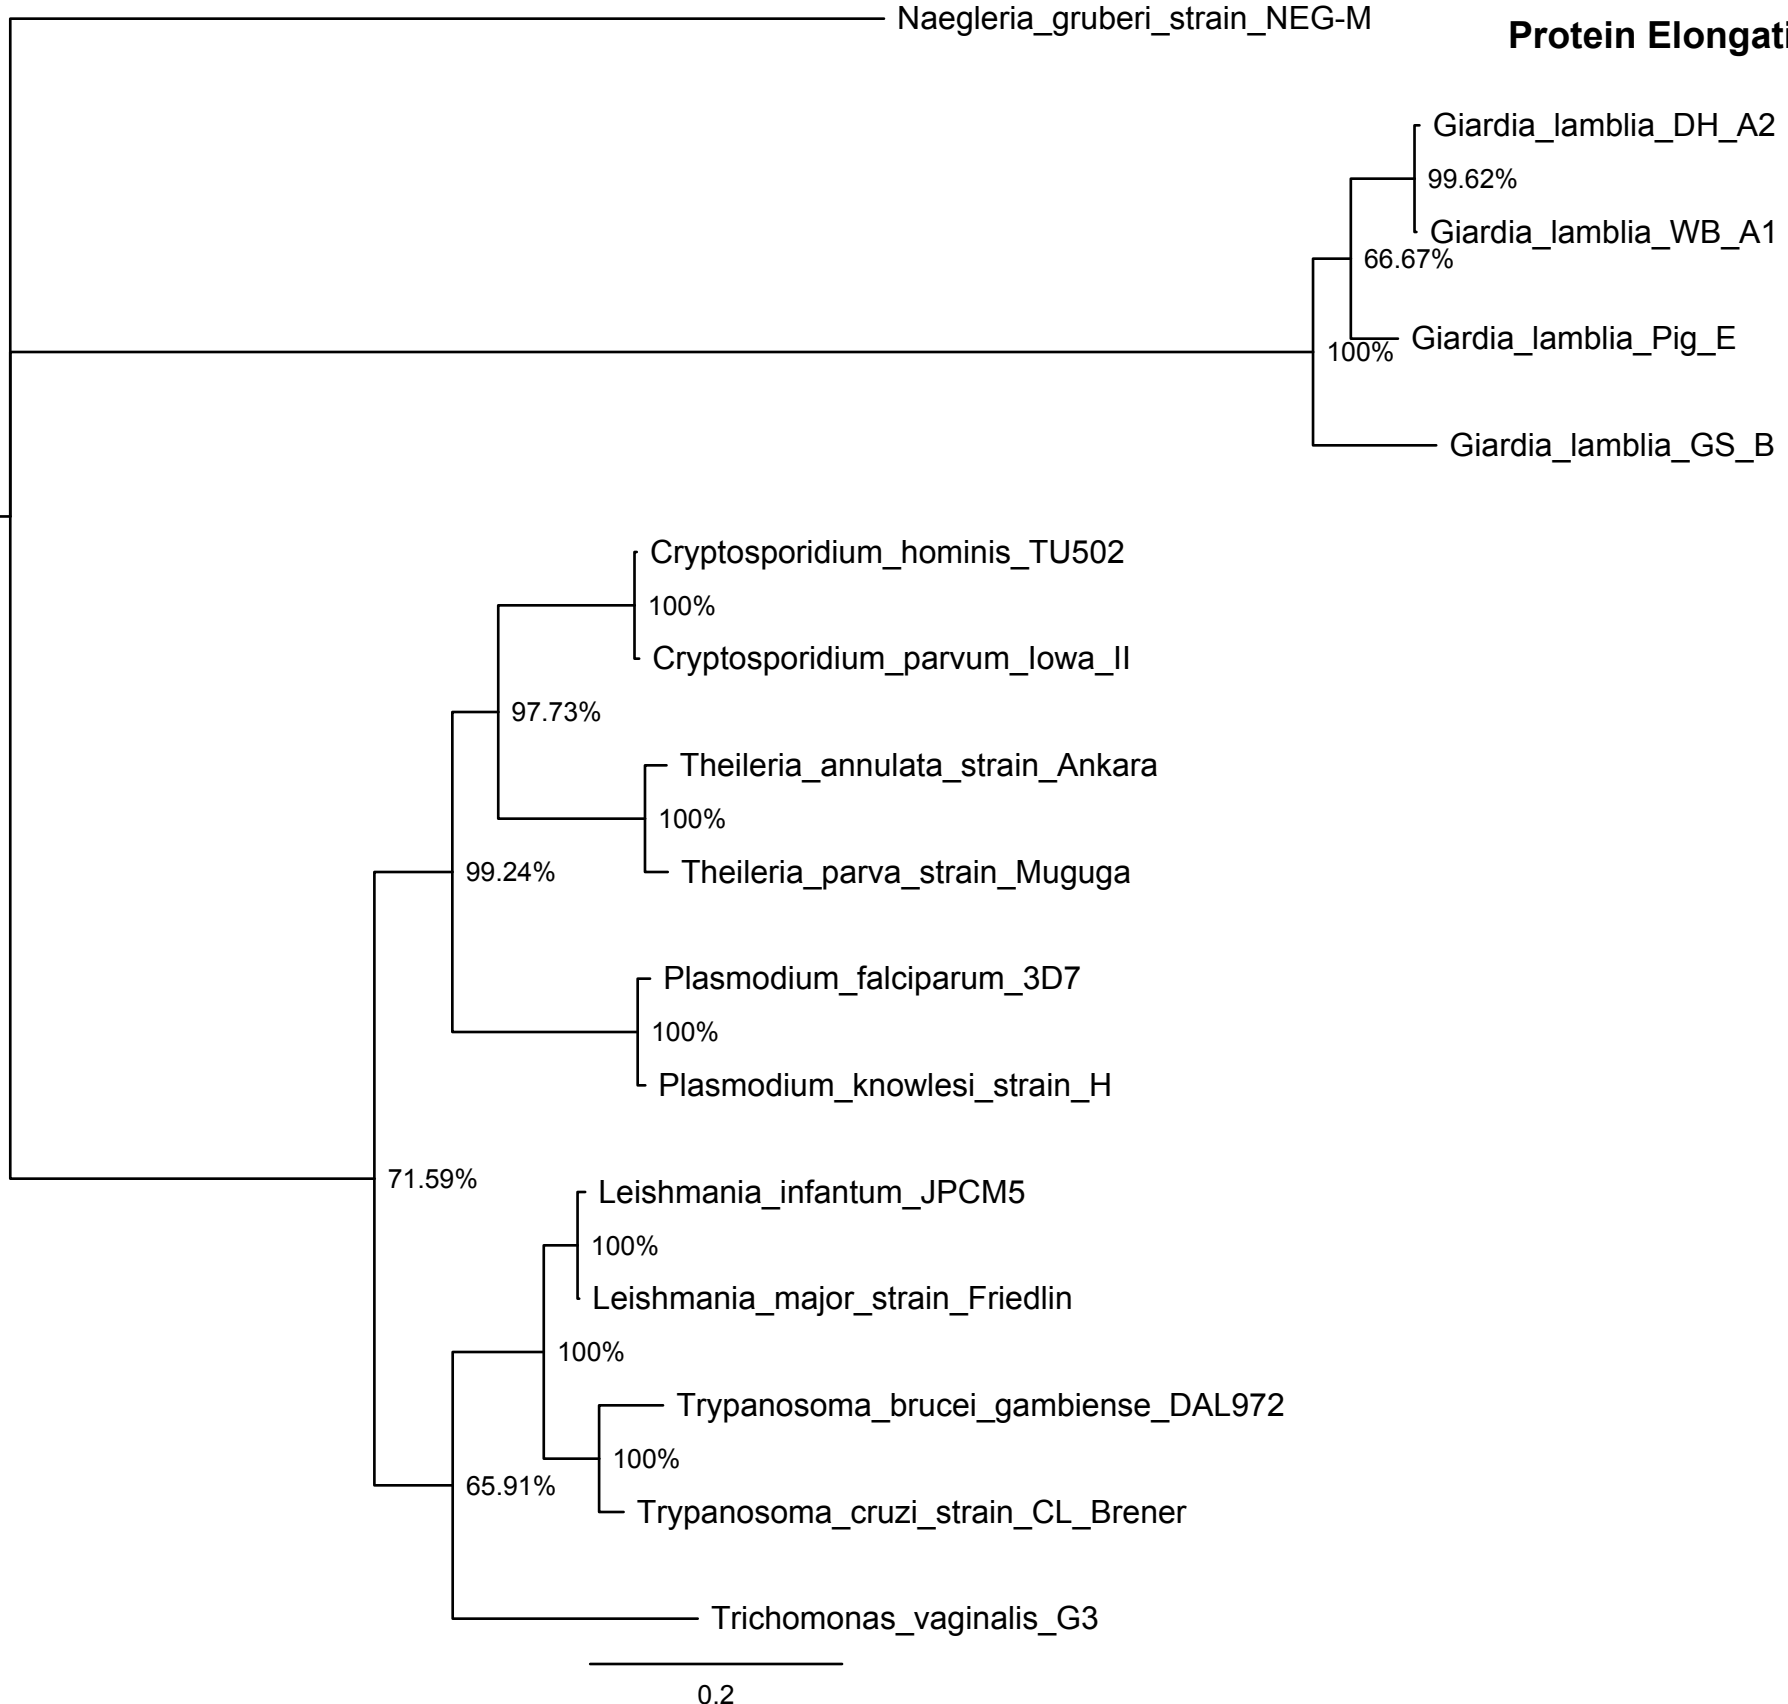

**Fibrillarin**

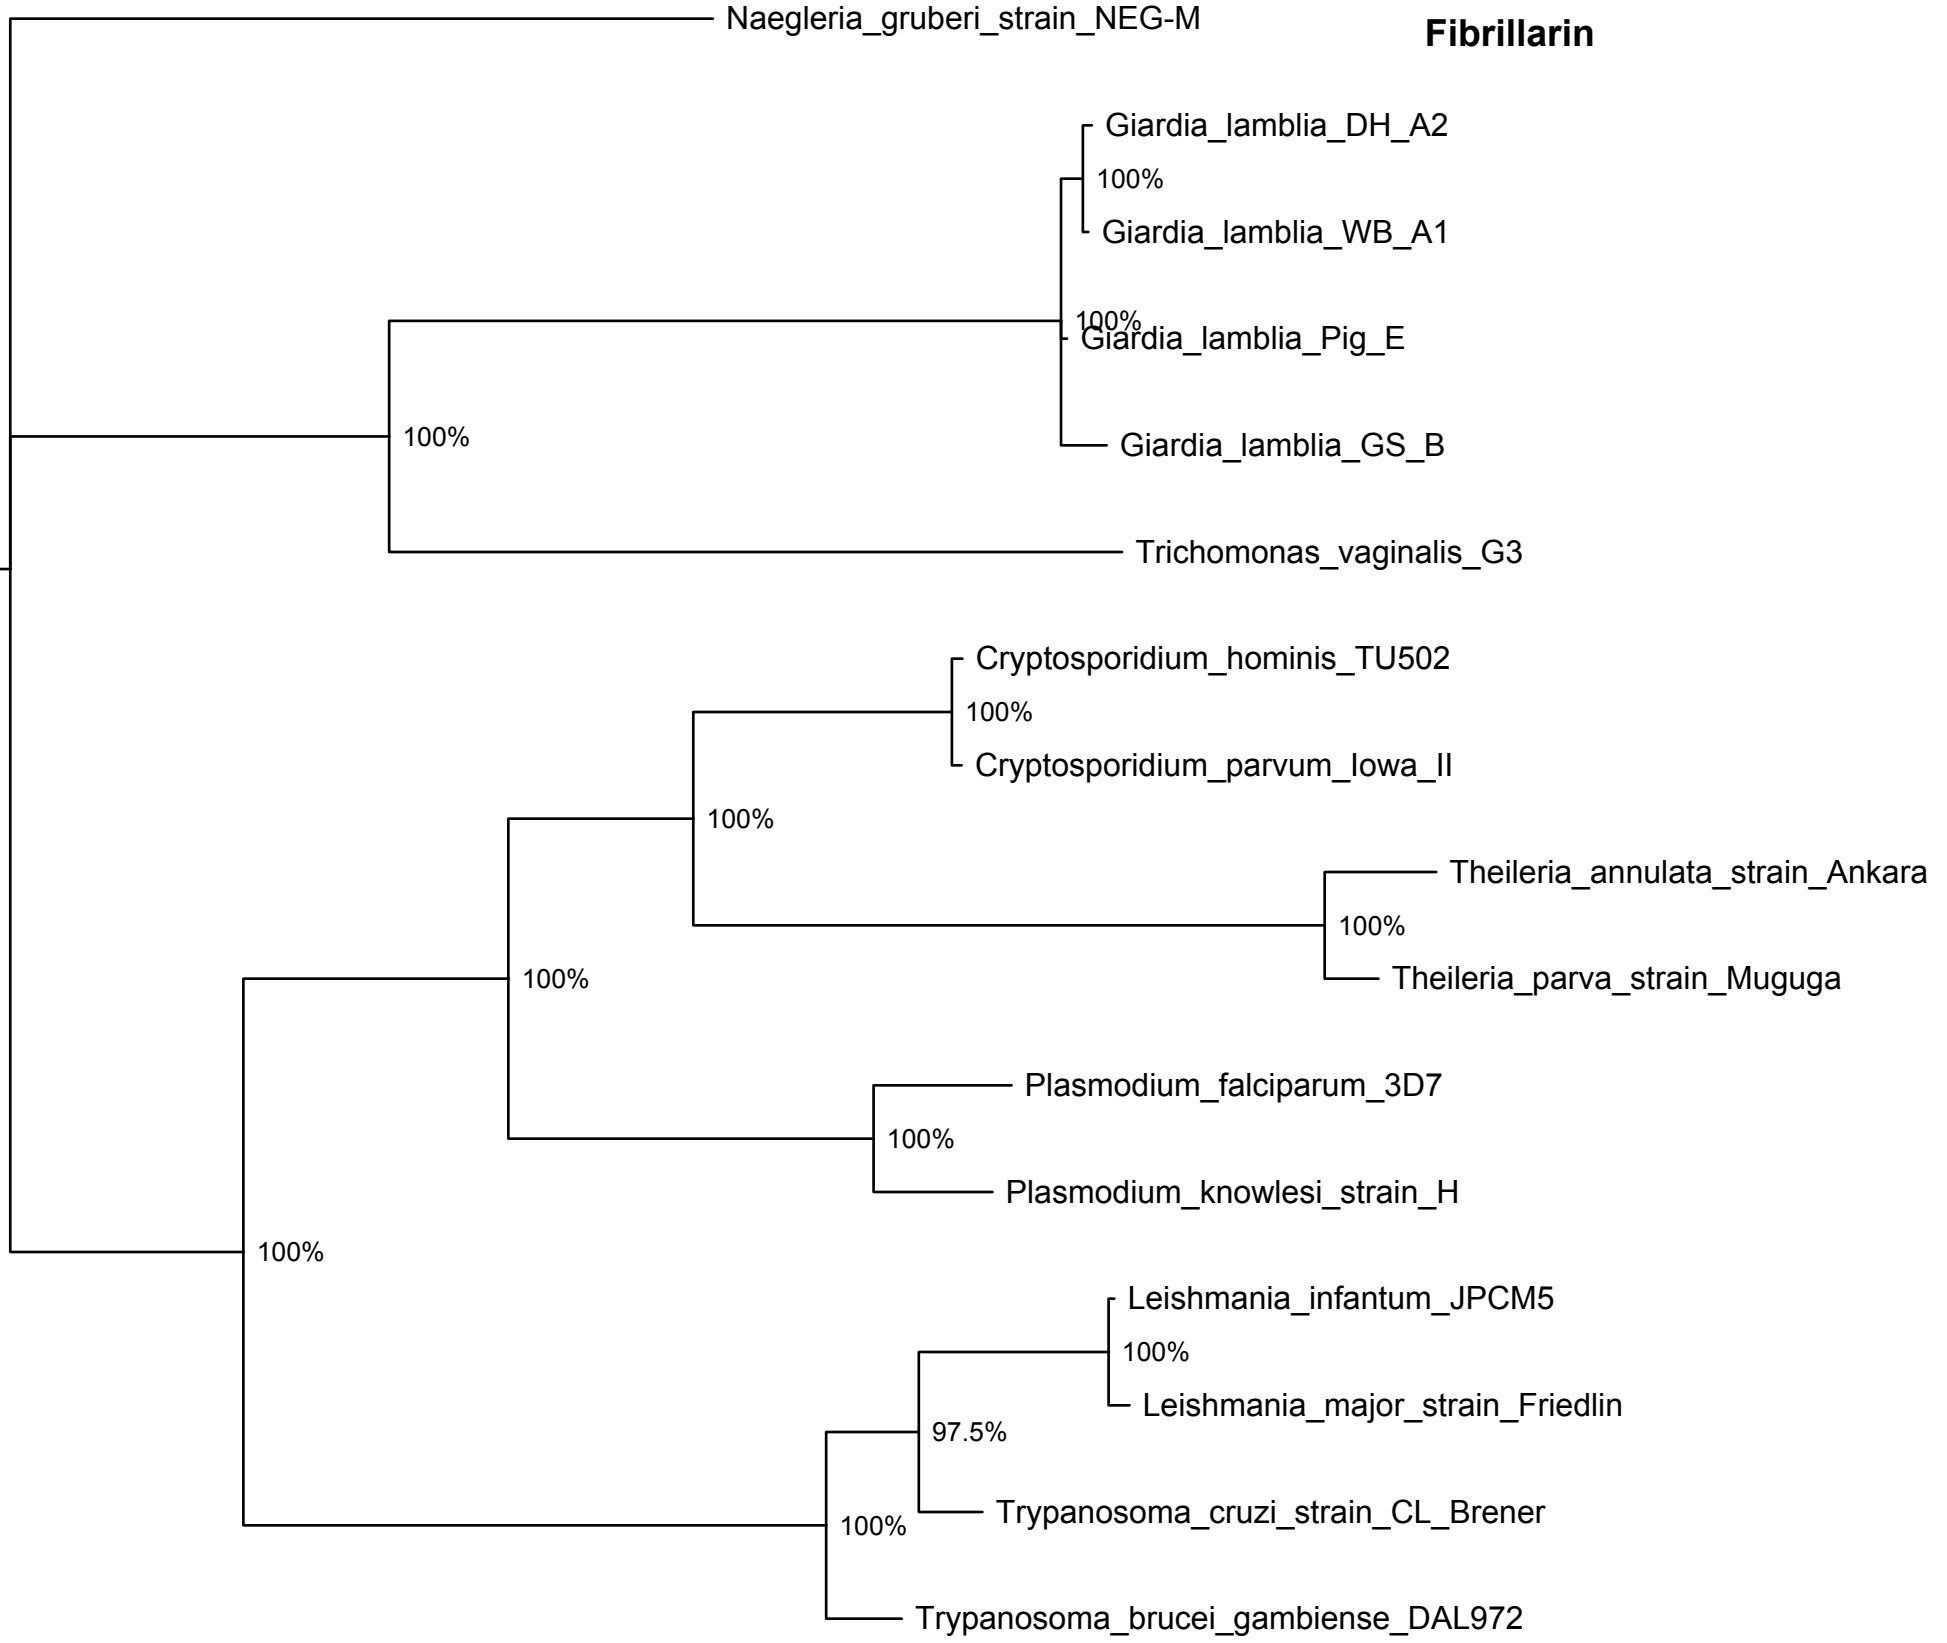

0.07

# Gluceraldehyde 3-Phosphate Dehydrogenase

Naegleria\_gruberi\_strain\_NEG-M

Leishmania\_infantum\_JPCM5

100%

Leishmania\_major\_strain\_Friedlin

100%

Trypanosoma\_brucei\_gambiense\_DAL972

100%

Trypanosoma\_cruzi\_strain\_CL\_Brener

Giardia\_lamblia\_DH\_A2

77.5%

Giardia\_lamblia\_WB\_A1

100%

Giardia\_lamblia\_Pig\_E

52.5%

Giardia\_lamblia\_GS\_B

97.5%

Theileria\_annulata\_strain\_Ankara

100%

Theileria\_parva\_strain\_Muguga

97.5%

Cryptosporidium\_hominis\_TU502

100%

Cryptosporidium\_parvum\_lowa\_II

70%

Plasmodium\_falciparum\_3D7

100%

Plasmodium\_knowlesi\_strain\_H

95%

Trichomonas\_vaginalis\_G3

0.2

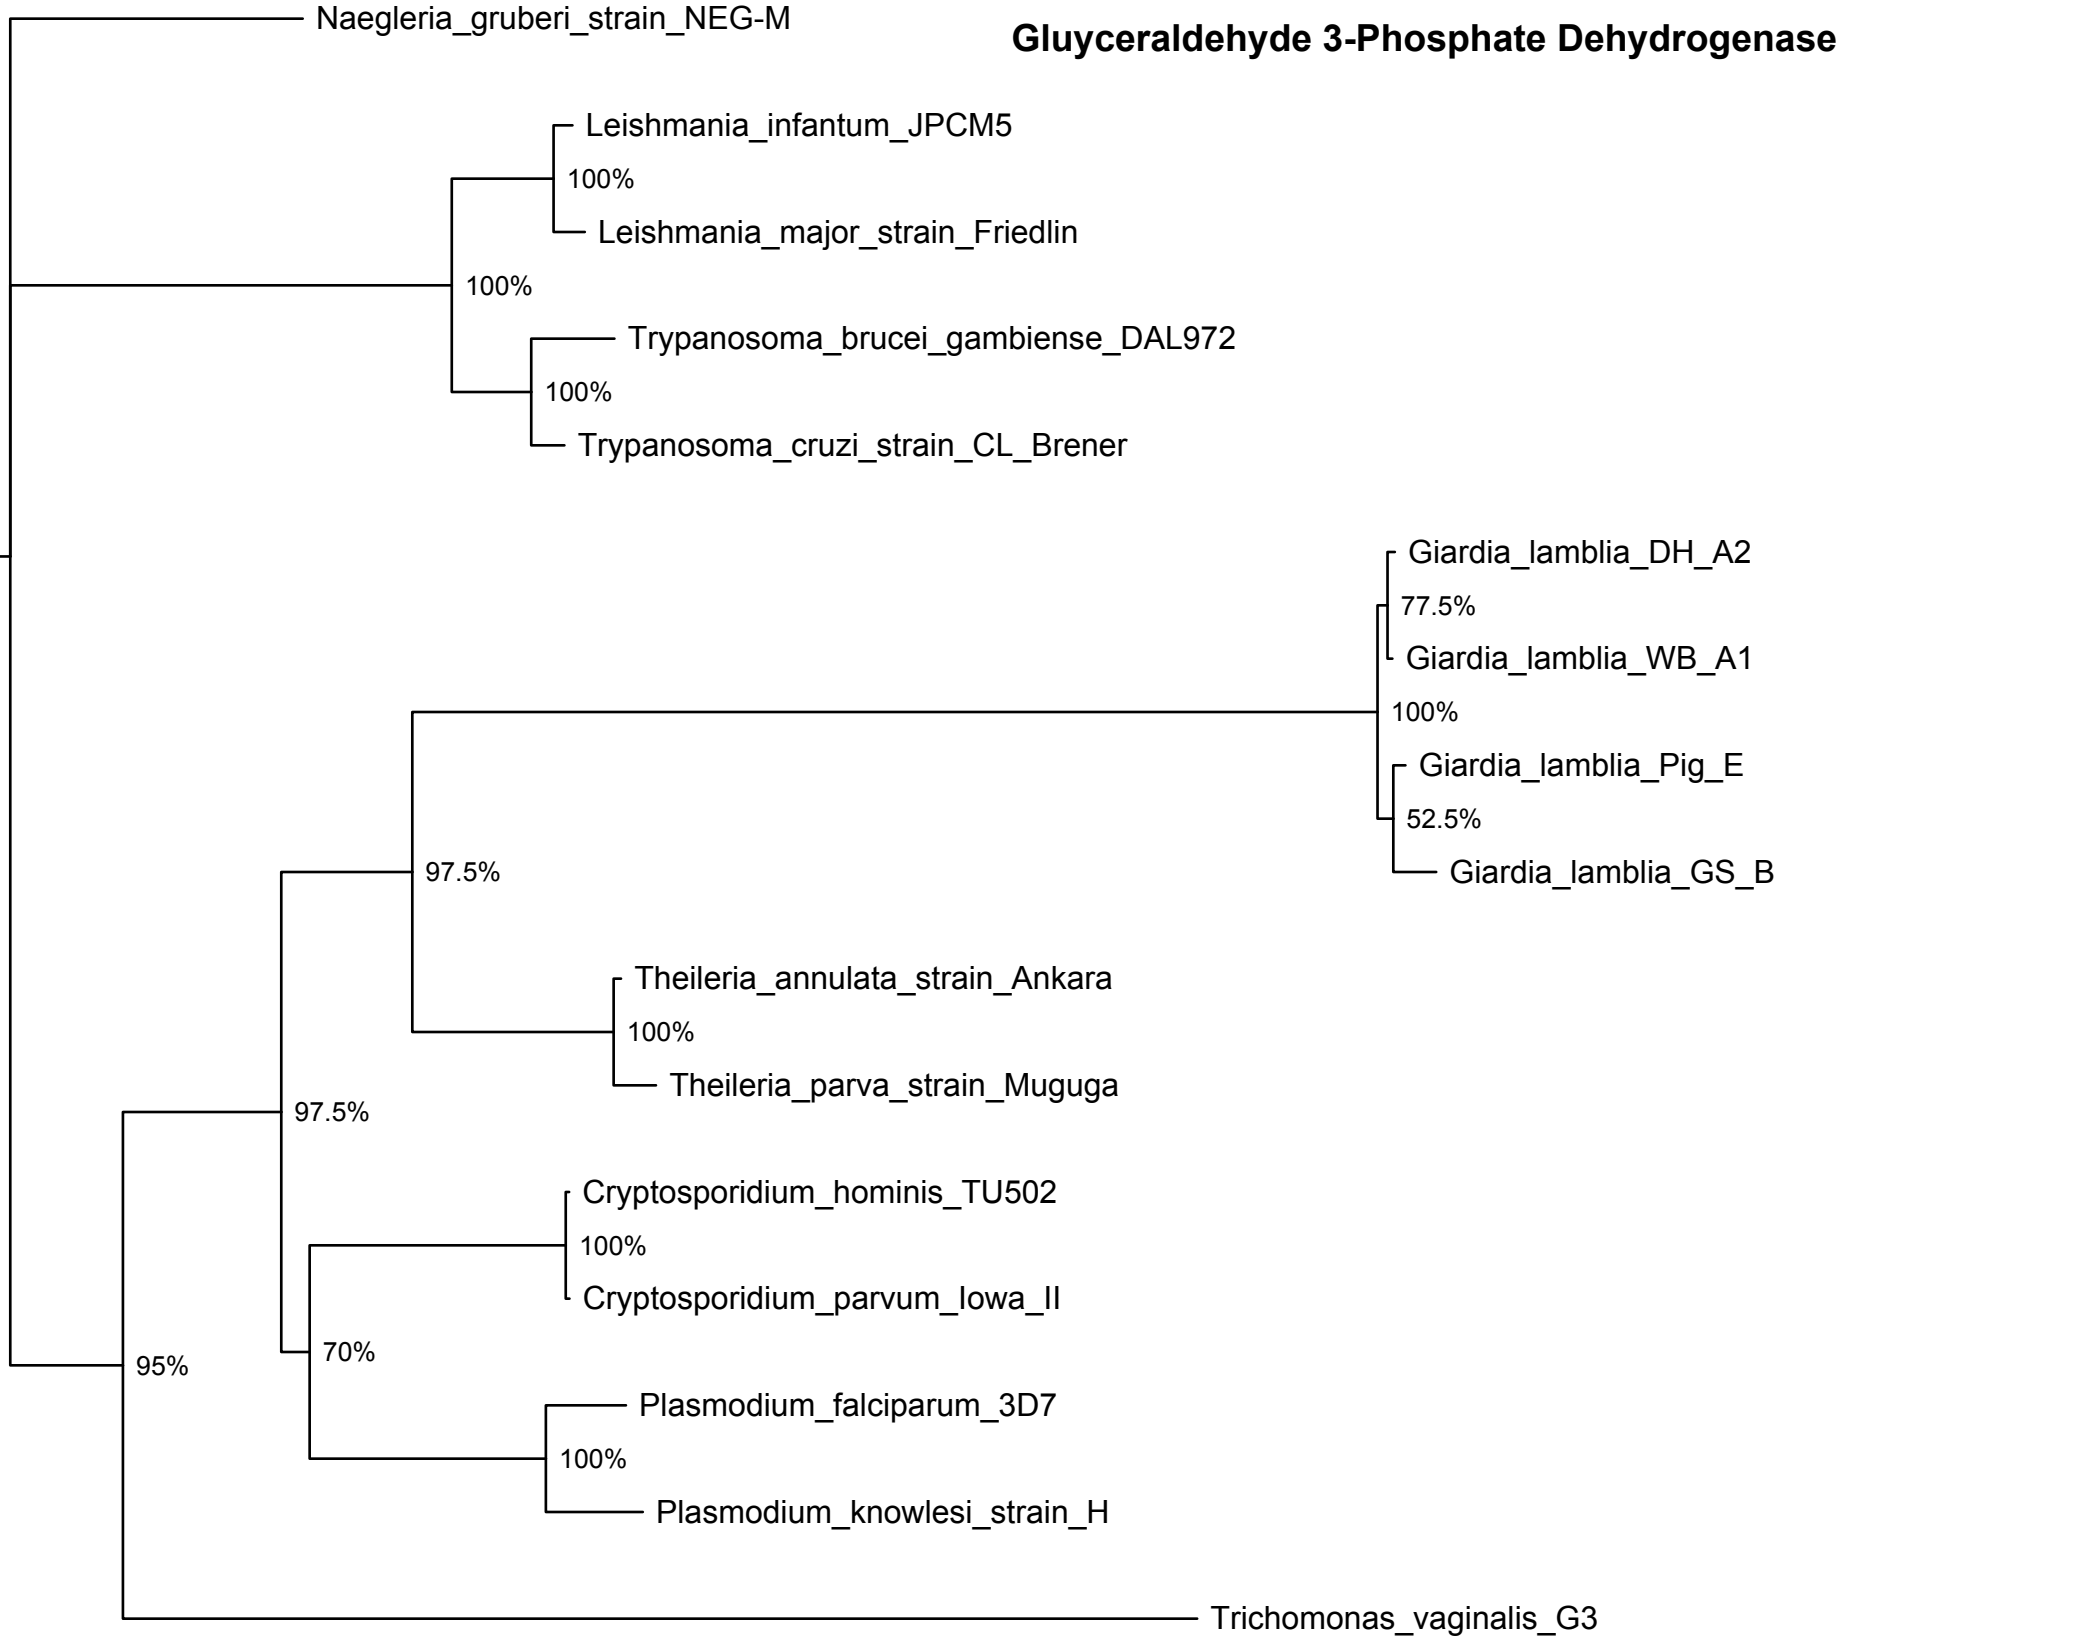

# Glucose-6-Phosphate Isomerase

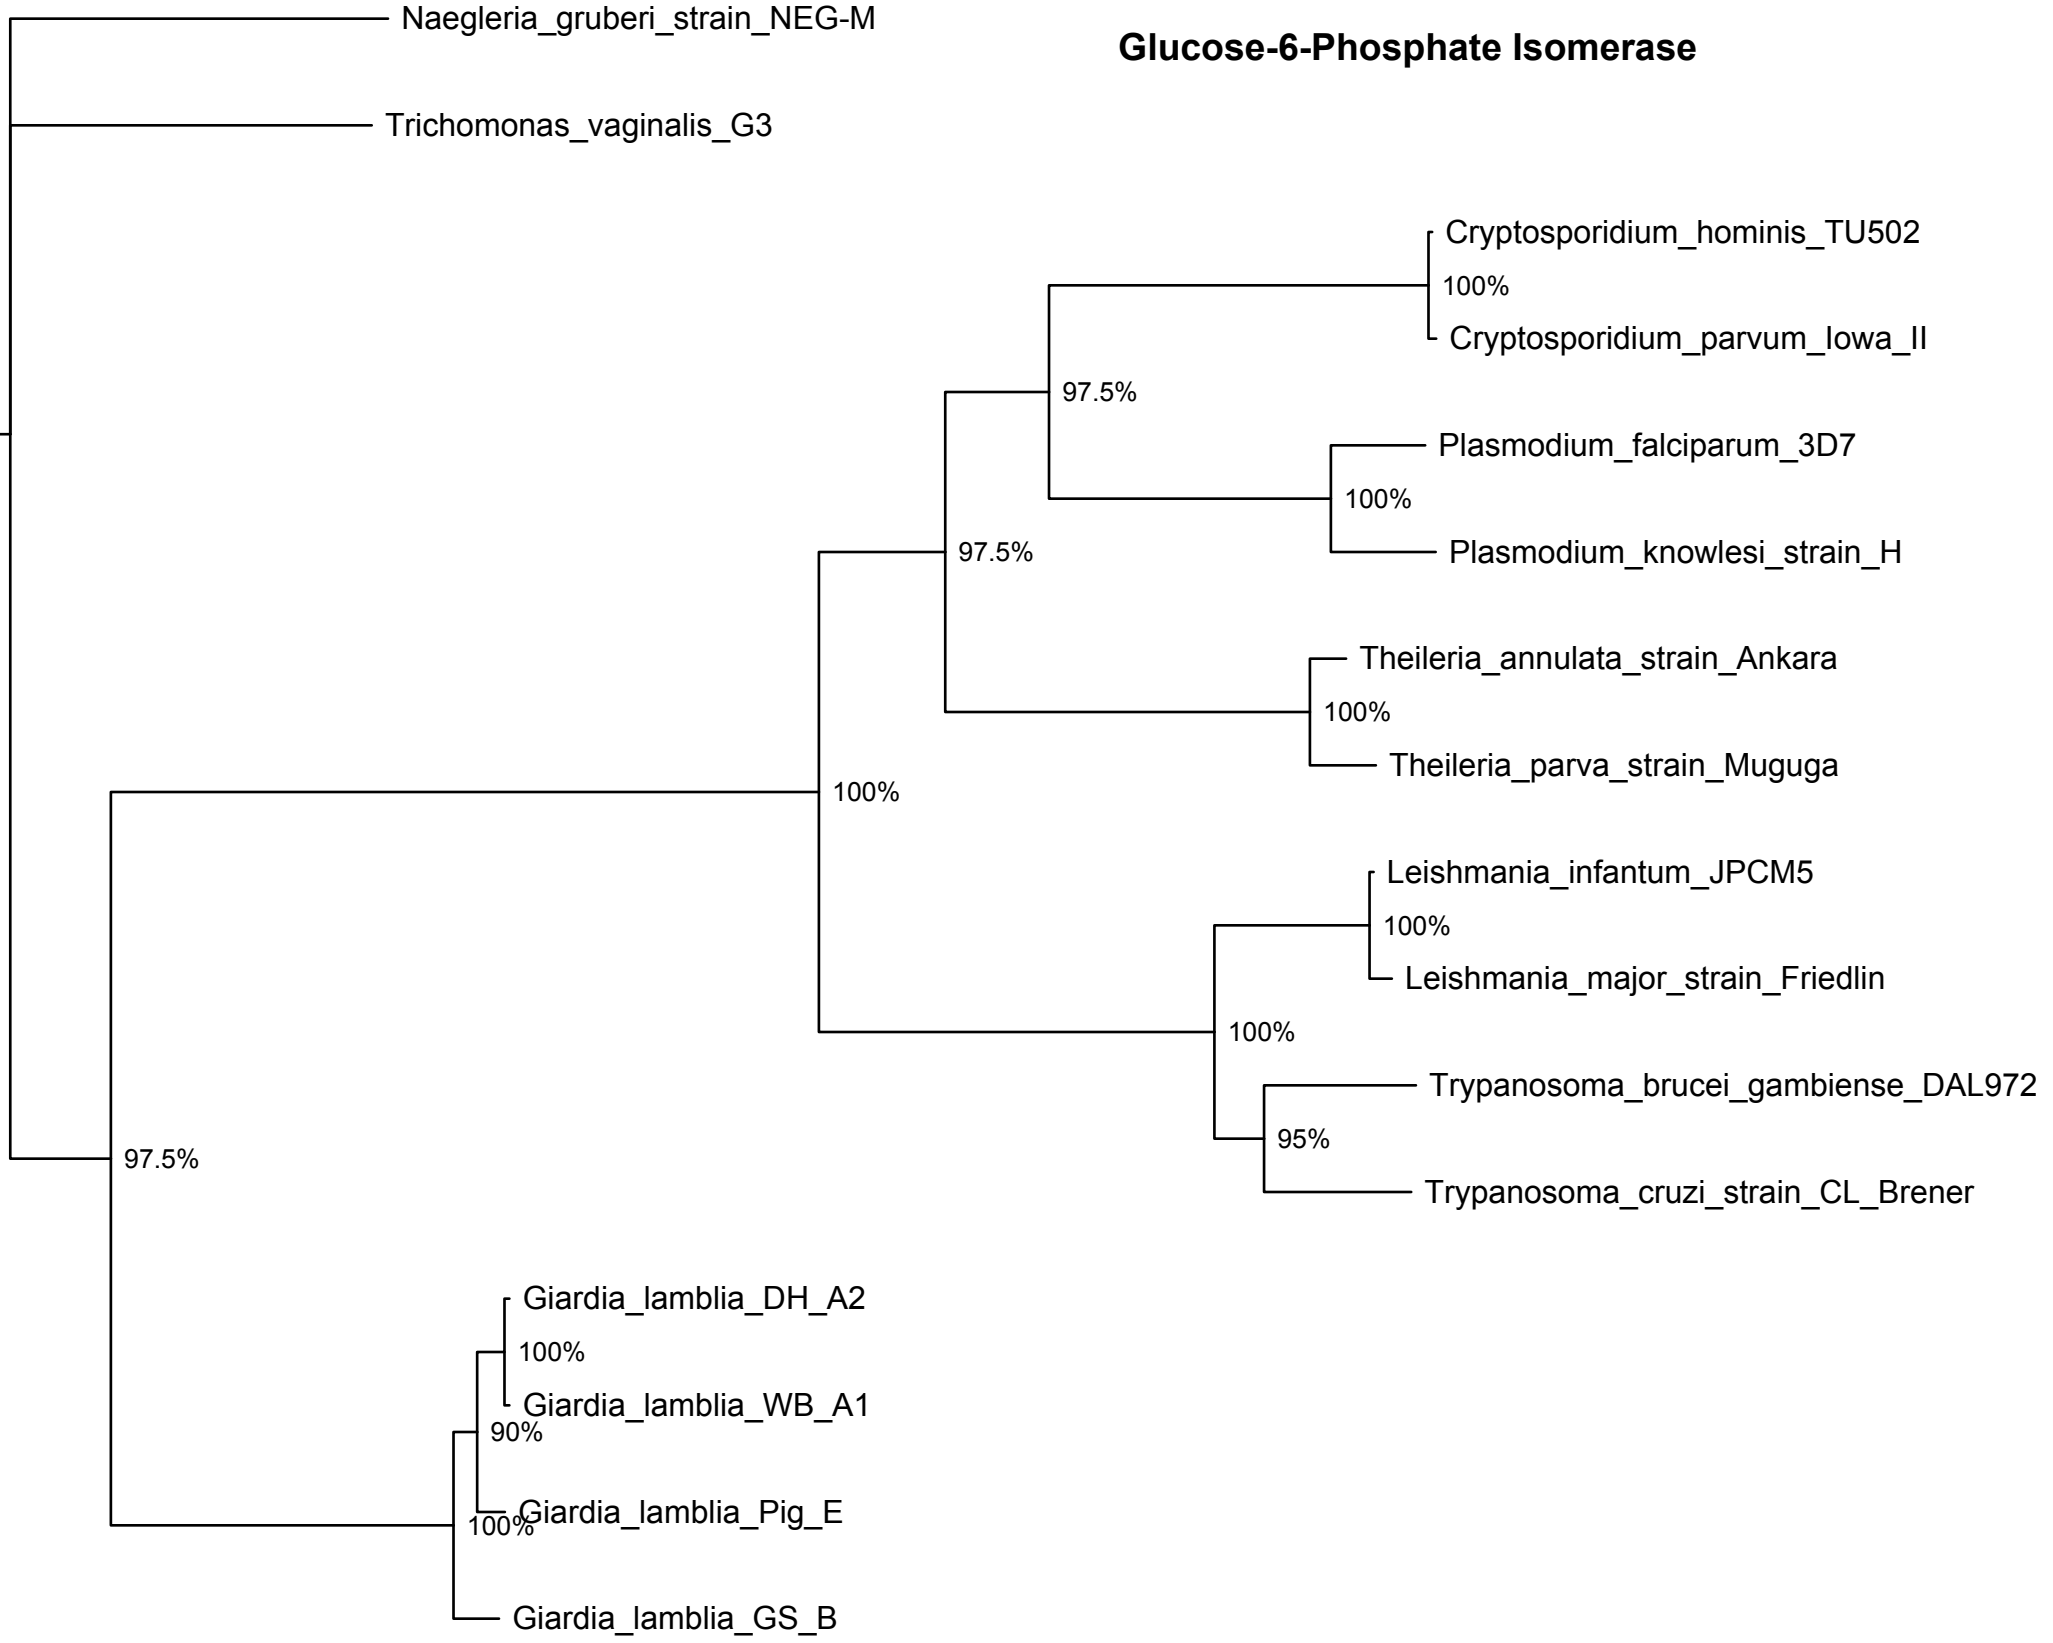

0.2

# NADP-specific Glutamate Dehydrogenase

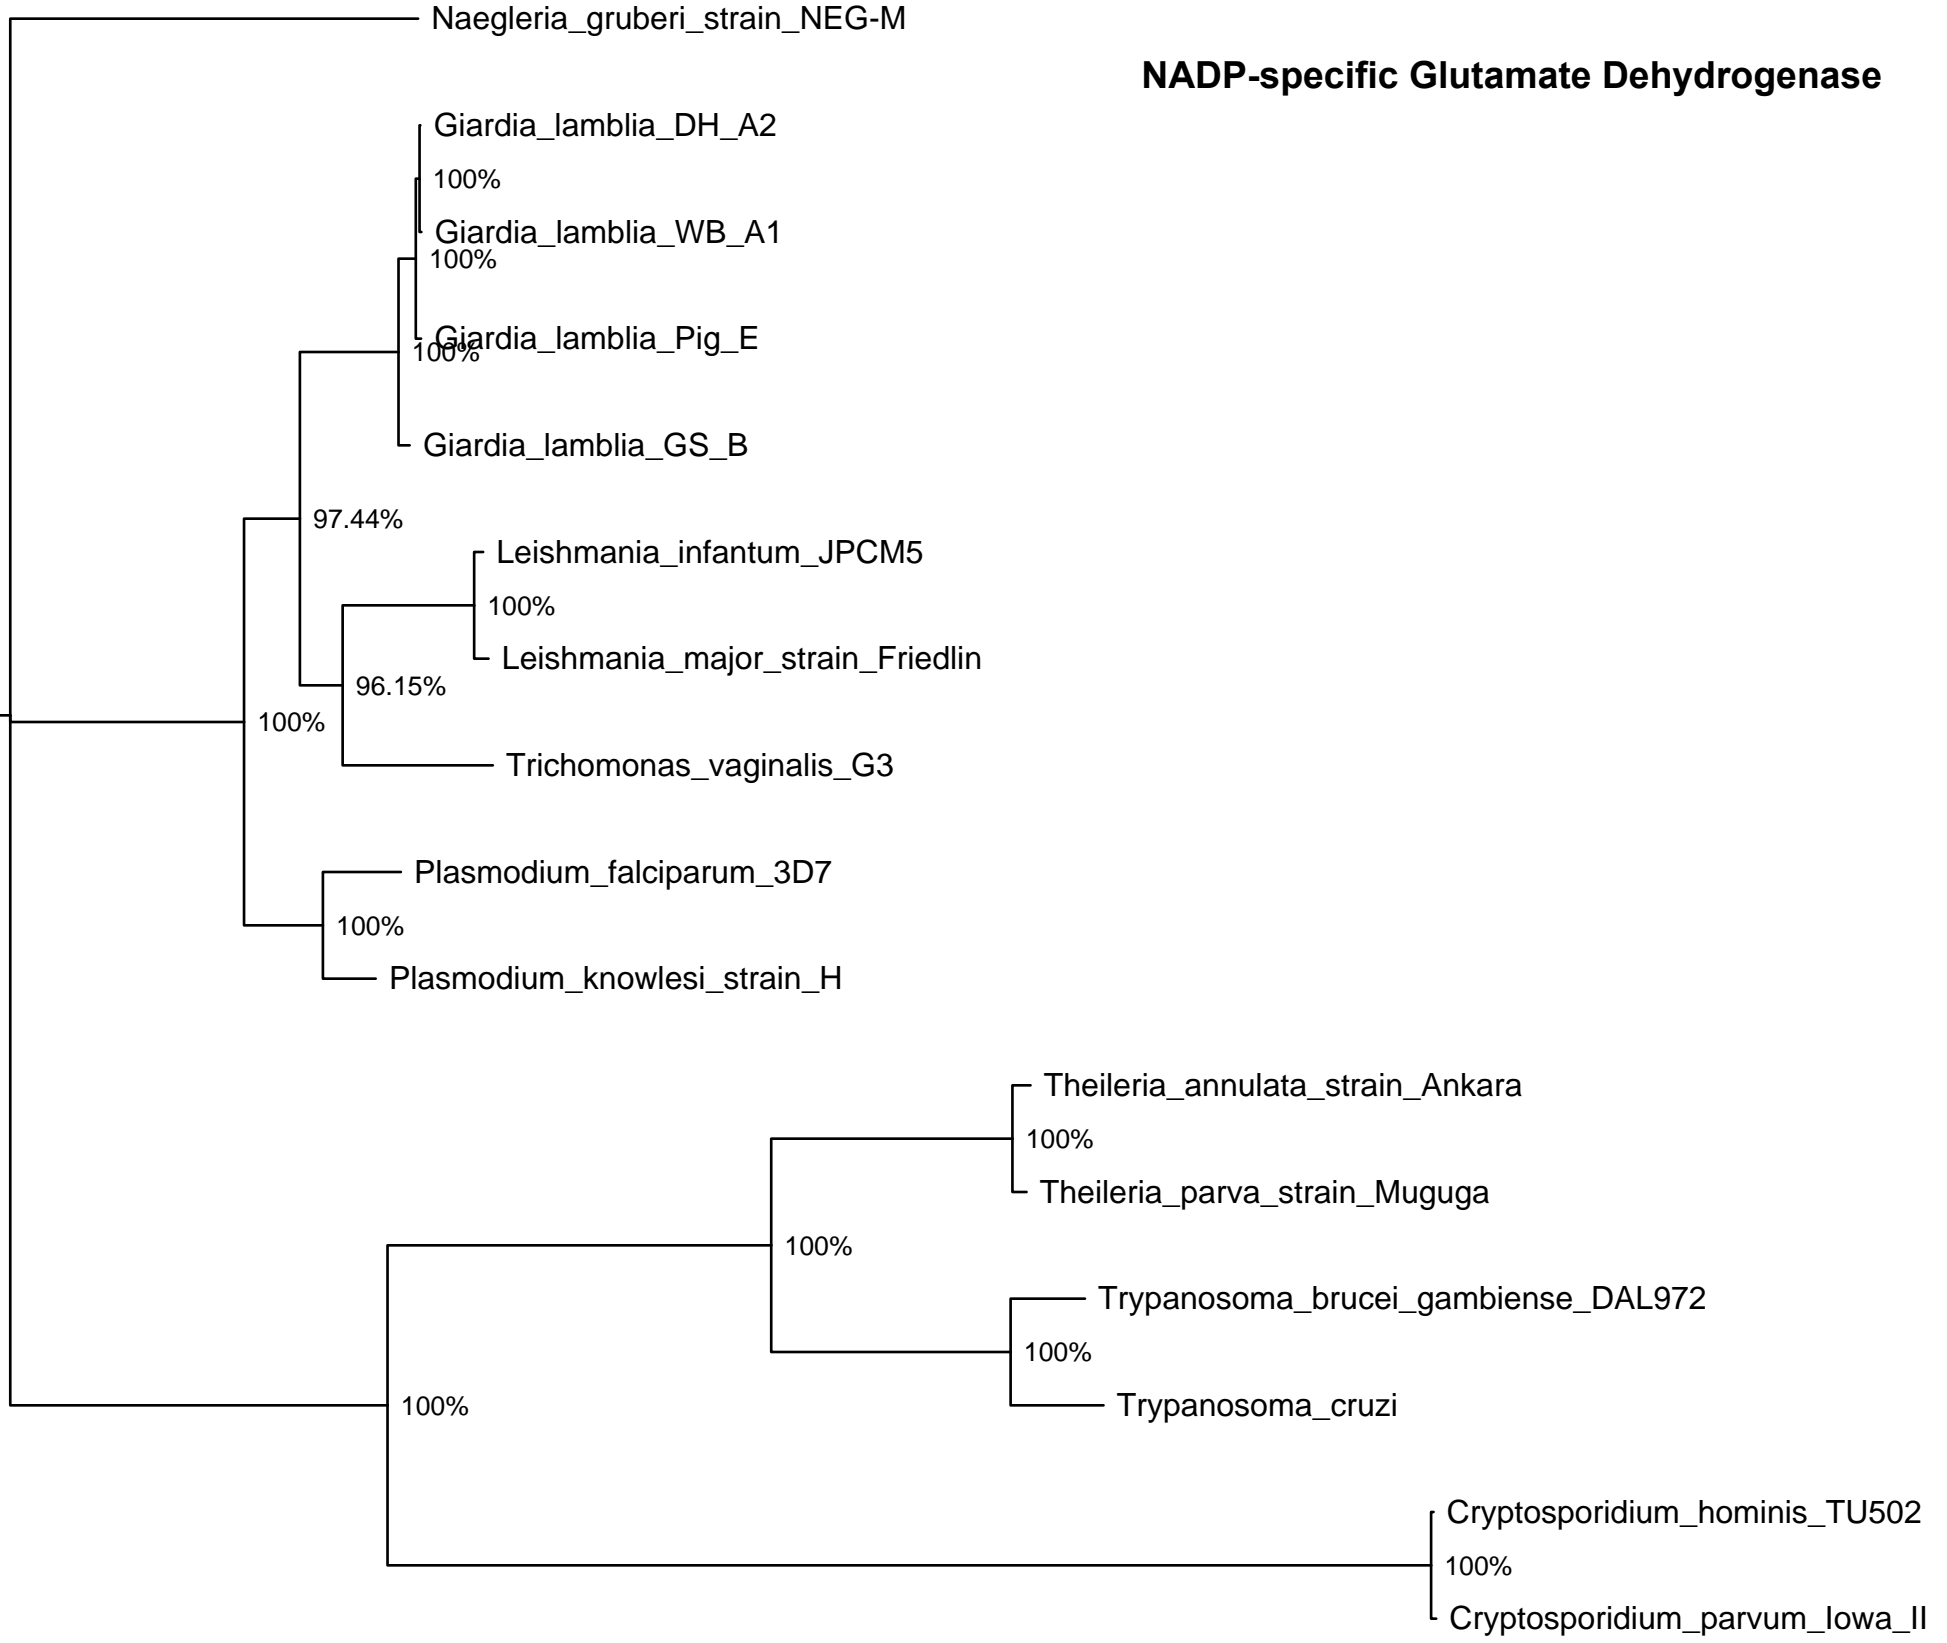

0.4



### Heat Shock Protein 70

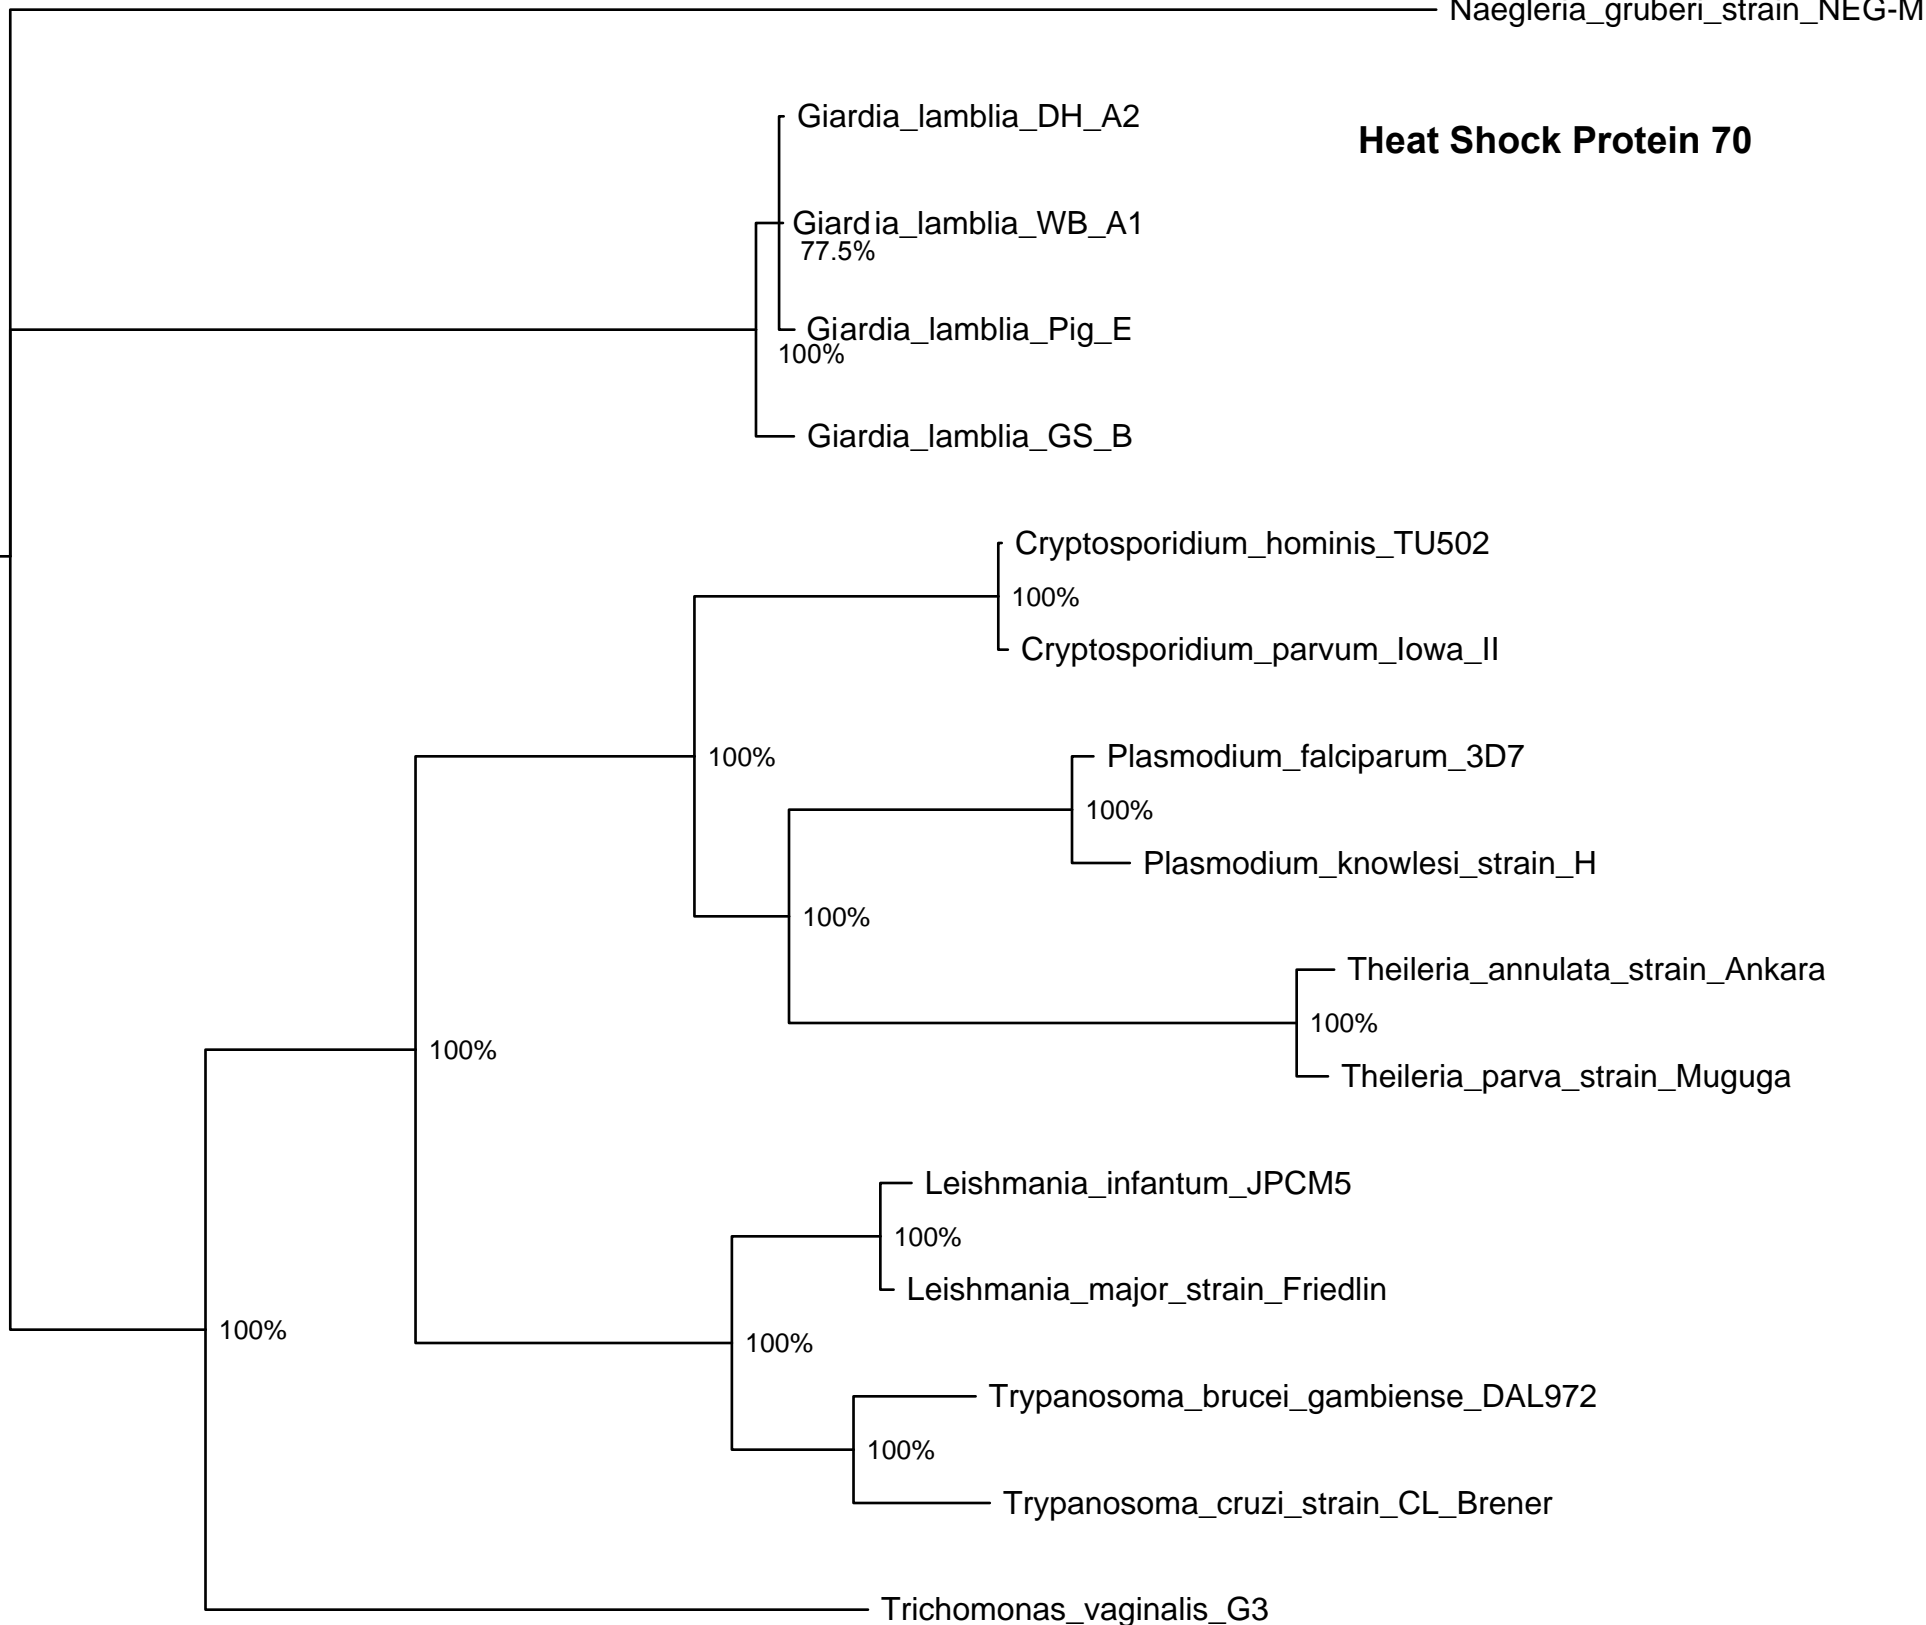

0.06

# LSU Ribosomal Protein L10P

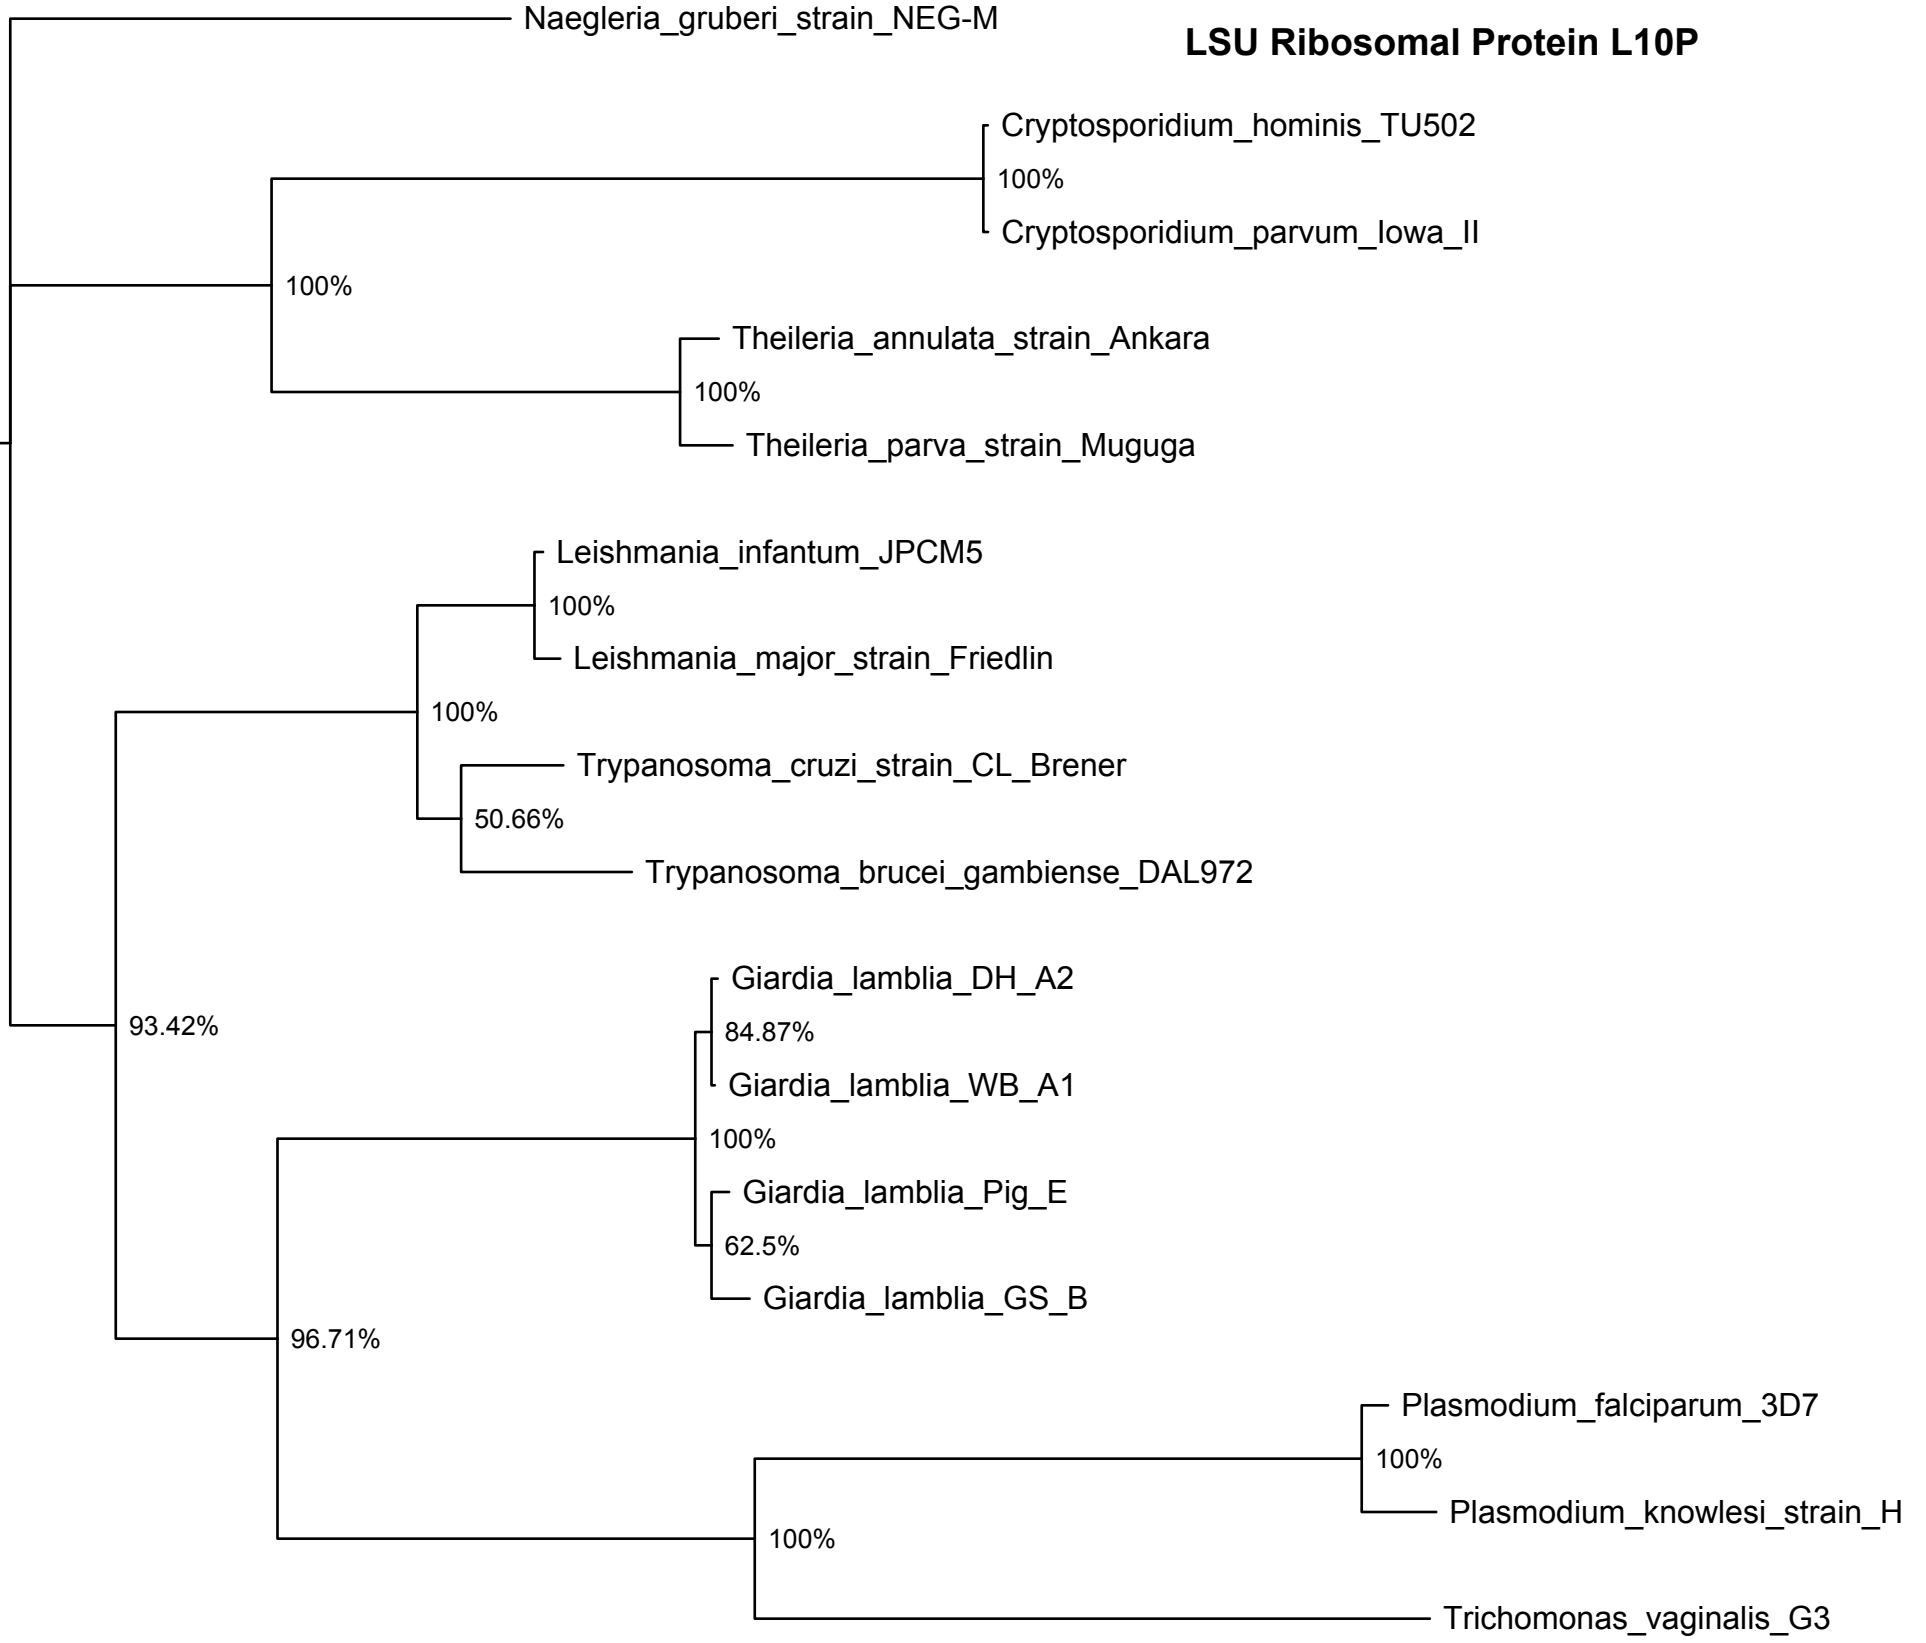

0.2

# Protein Elongation Factor 2

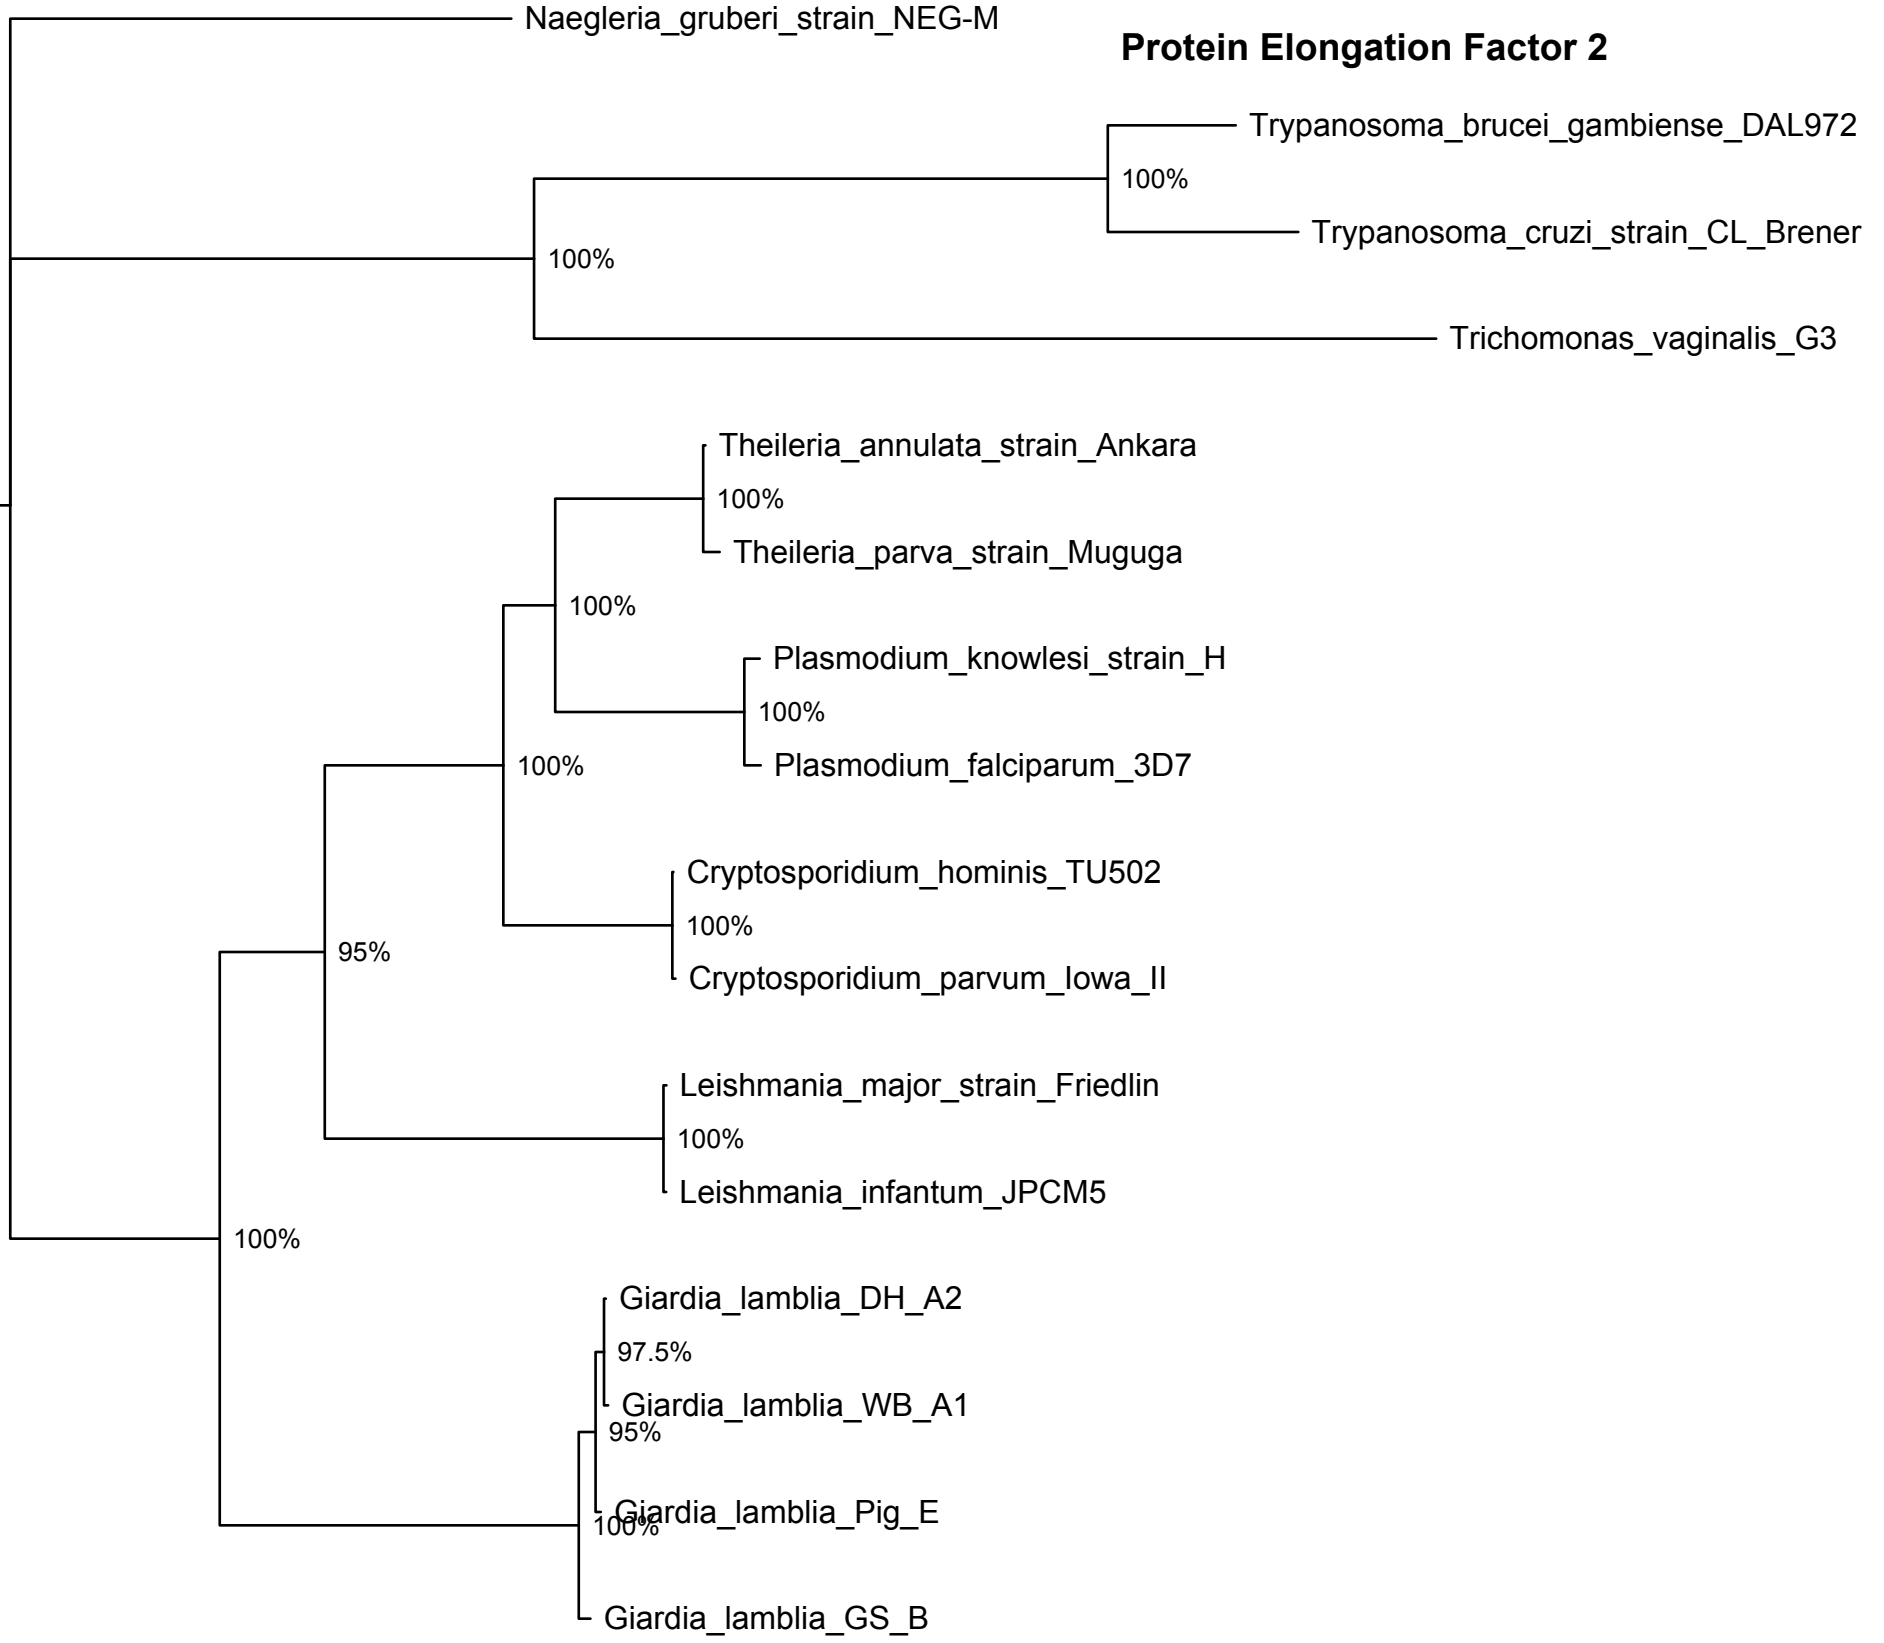

0.2

# Sec61 Alpha Subunit

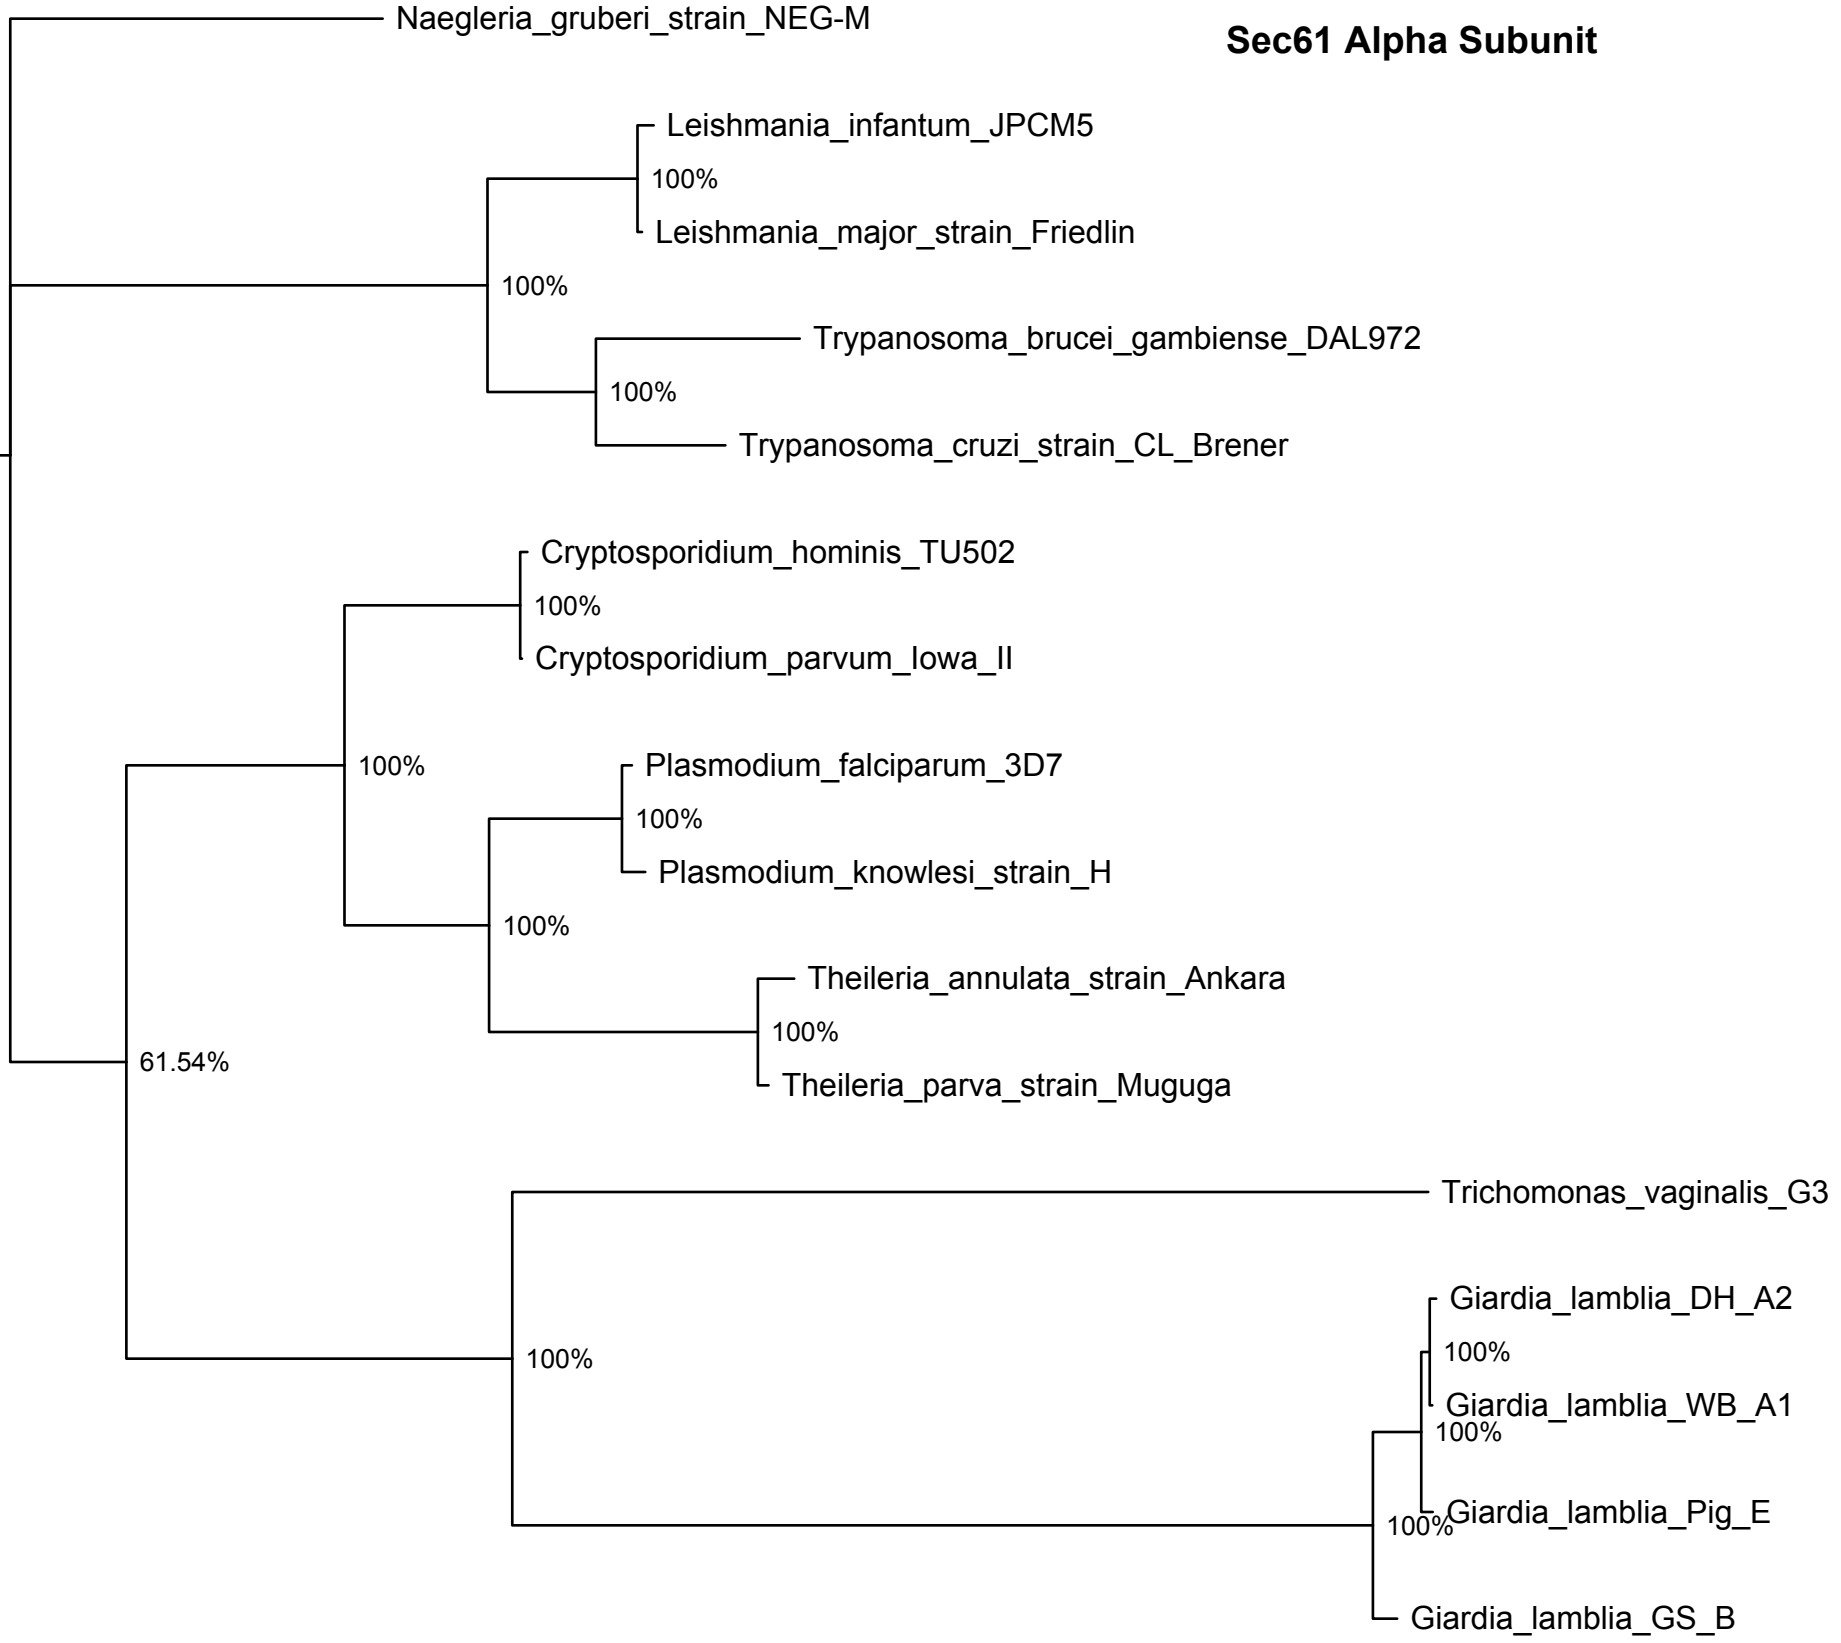

0.09

# Ribosomal Protein L14PL23e

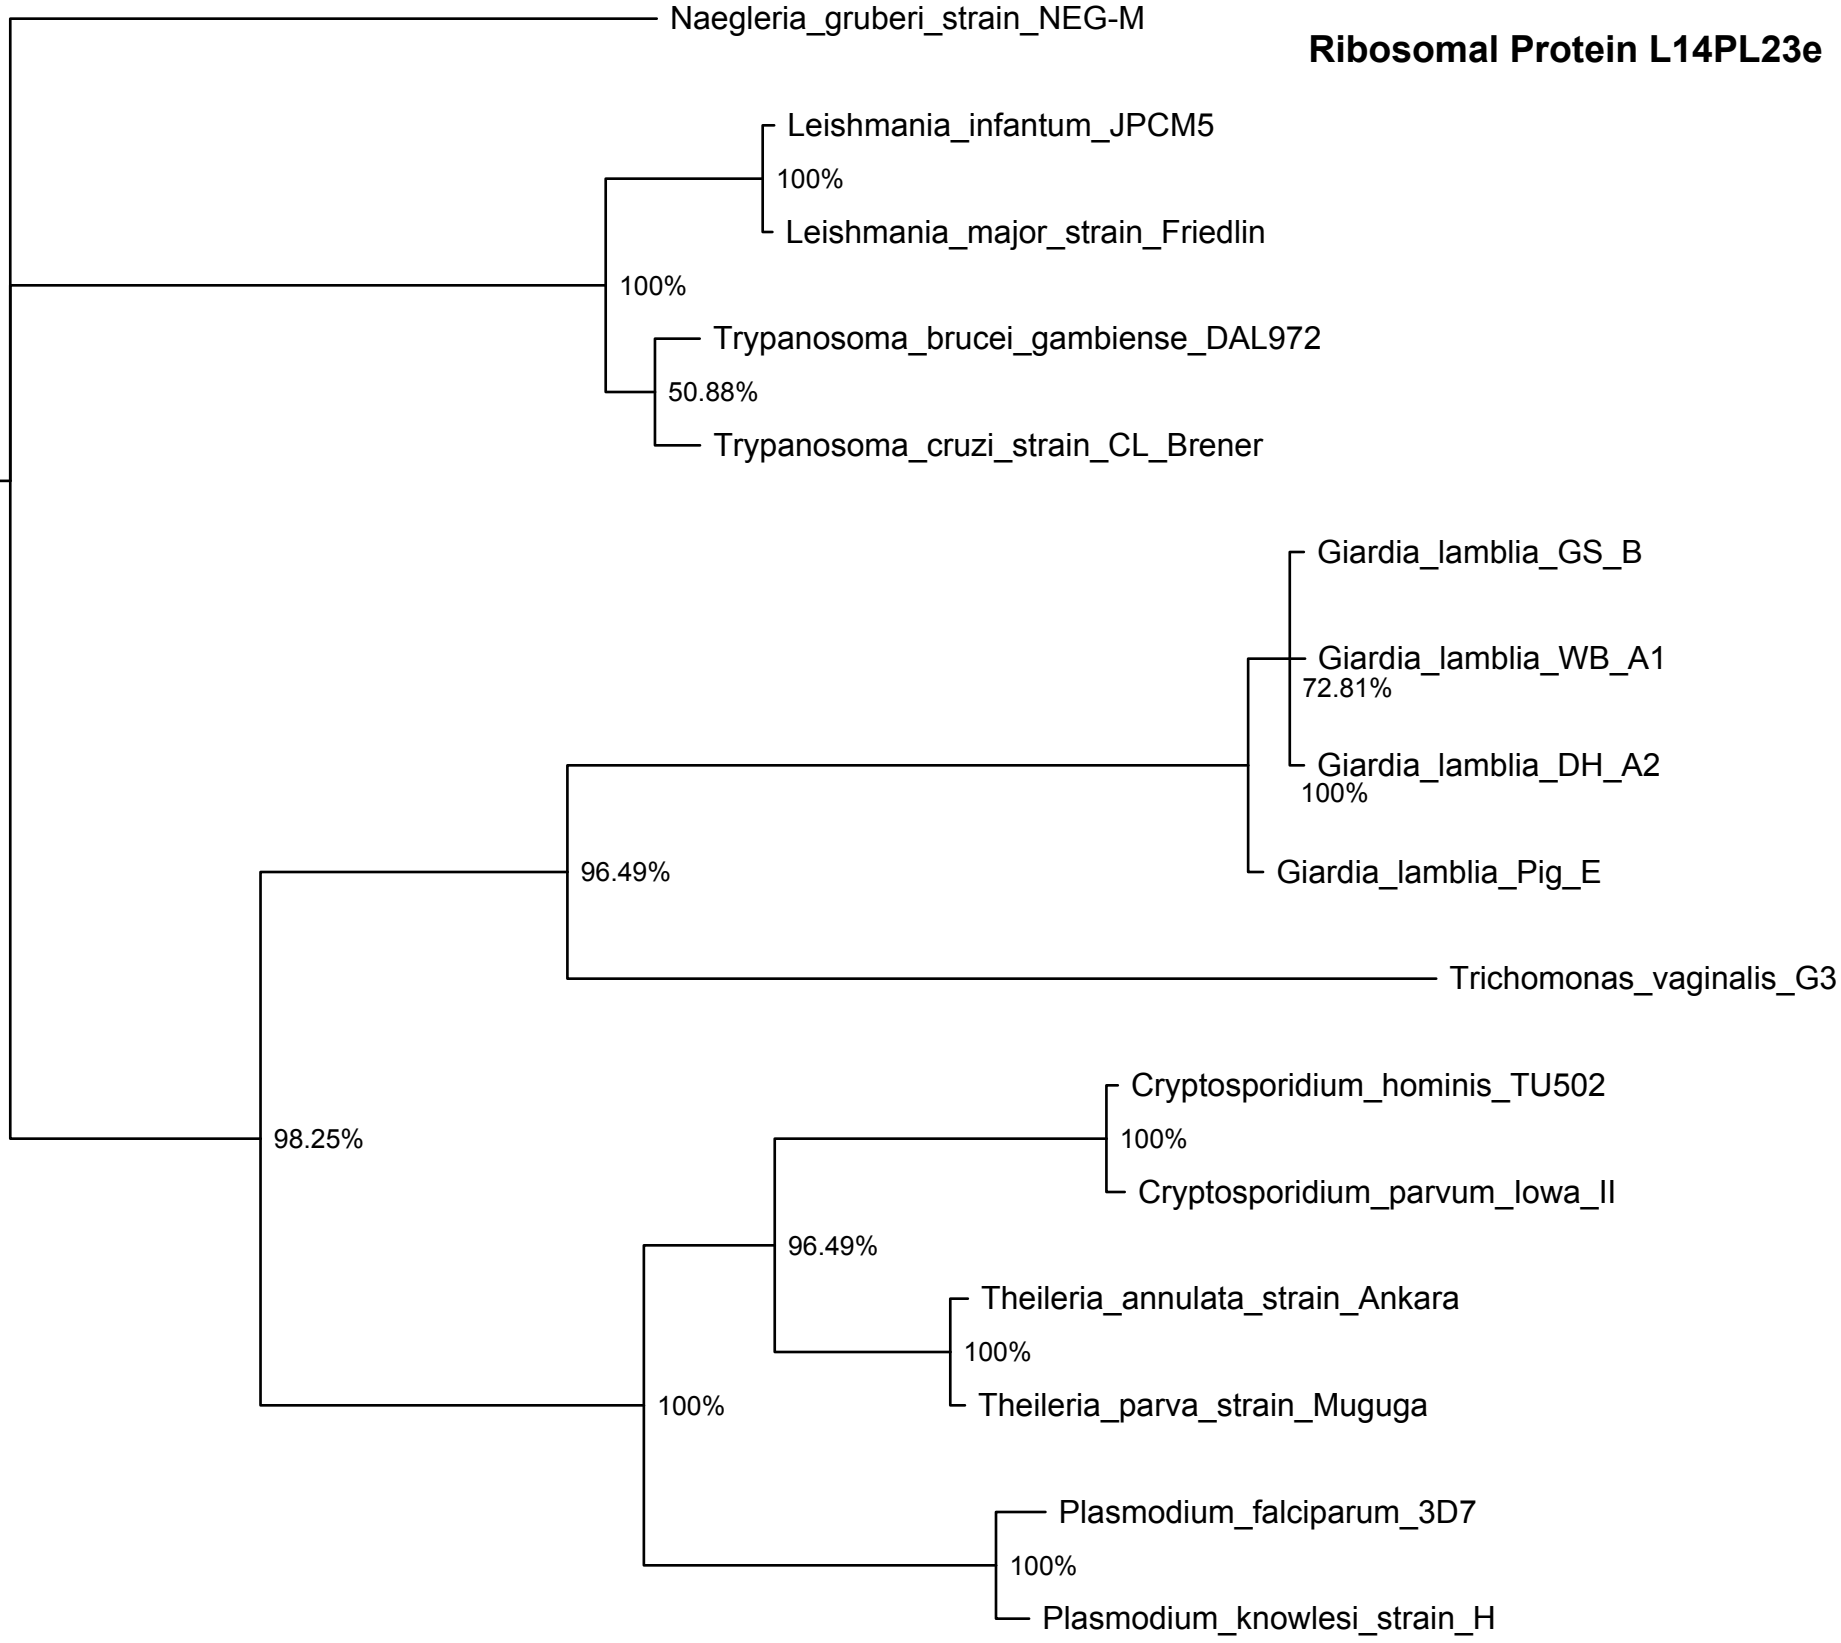

0.05

# SSU Ribosomal Protein S2P

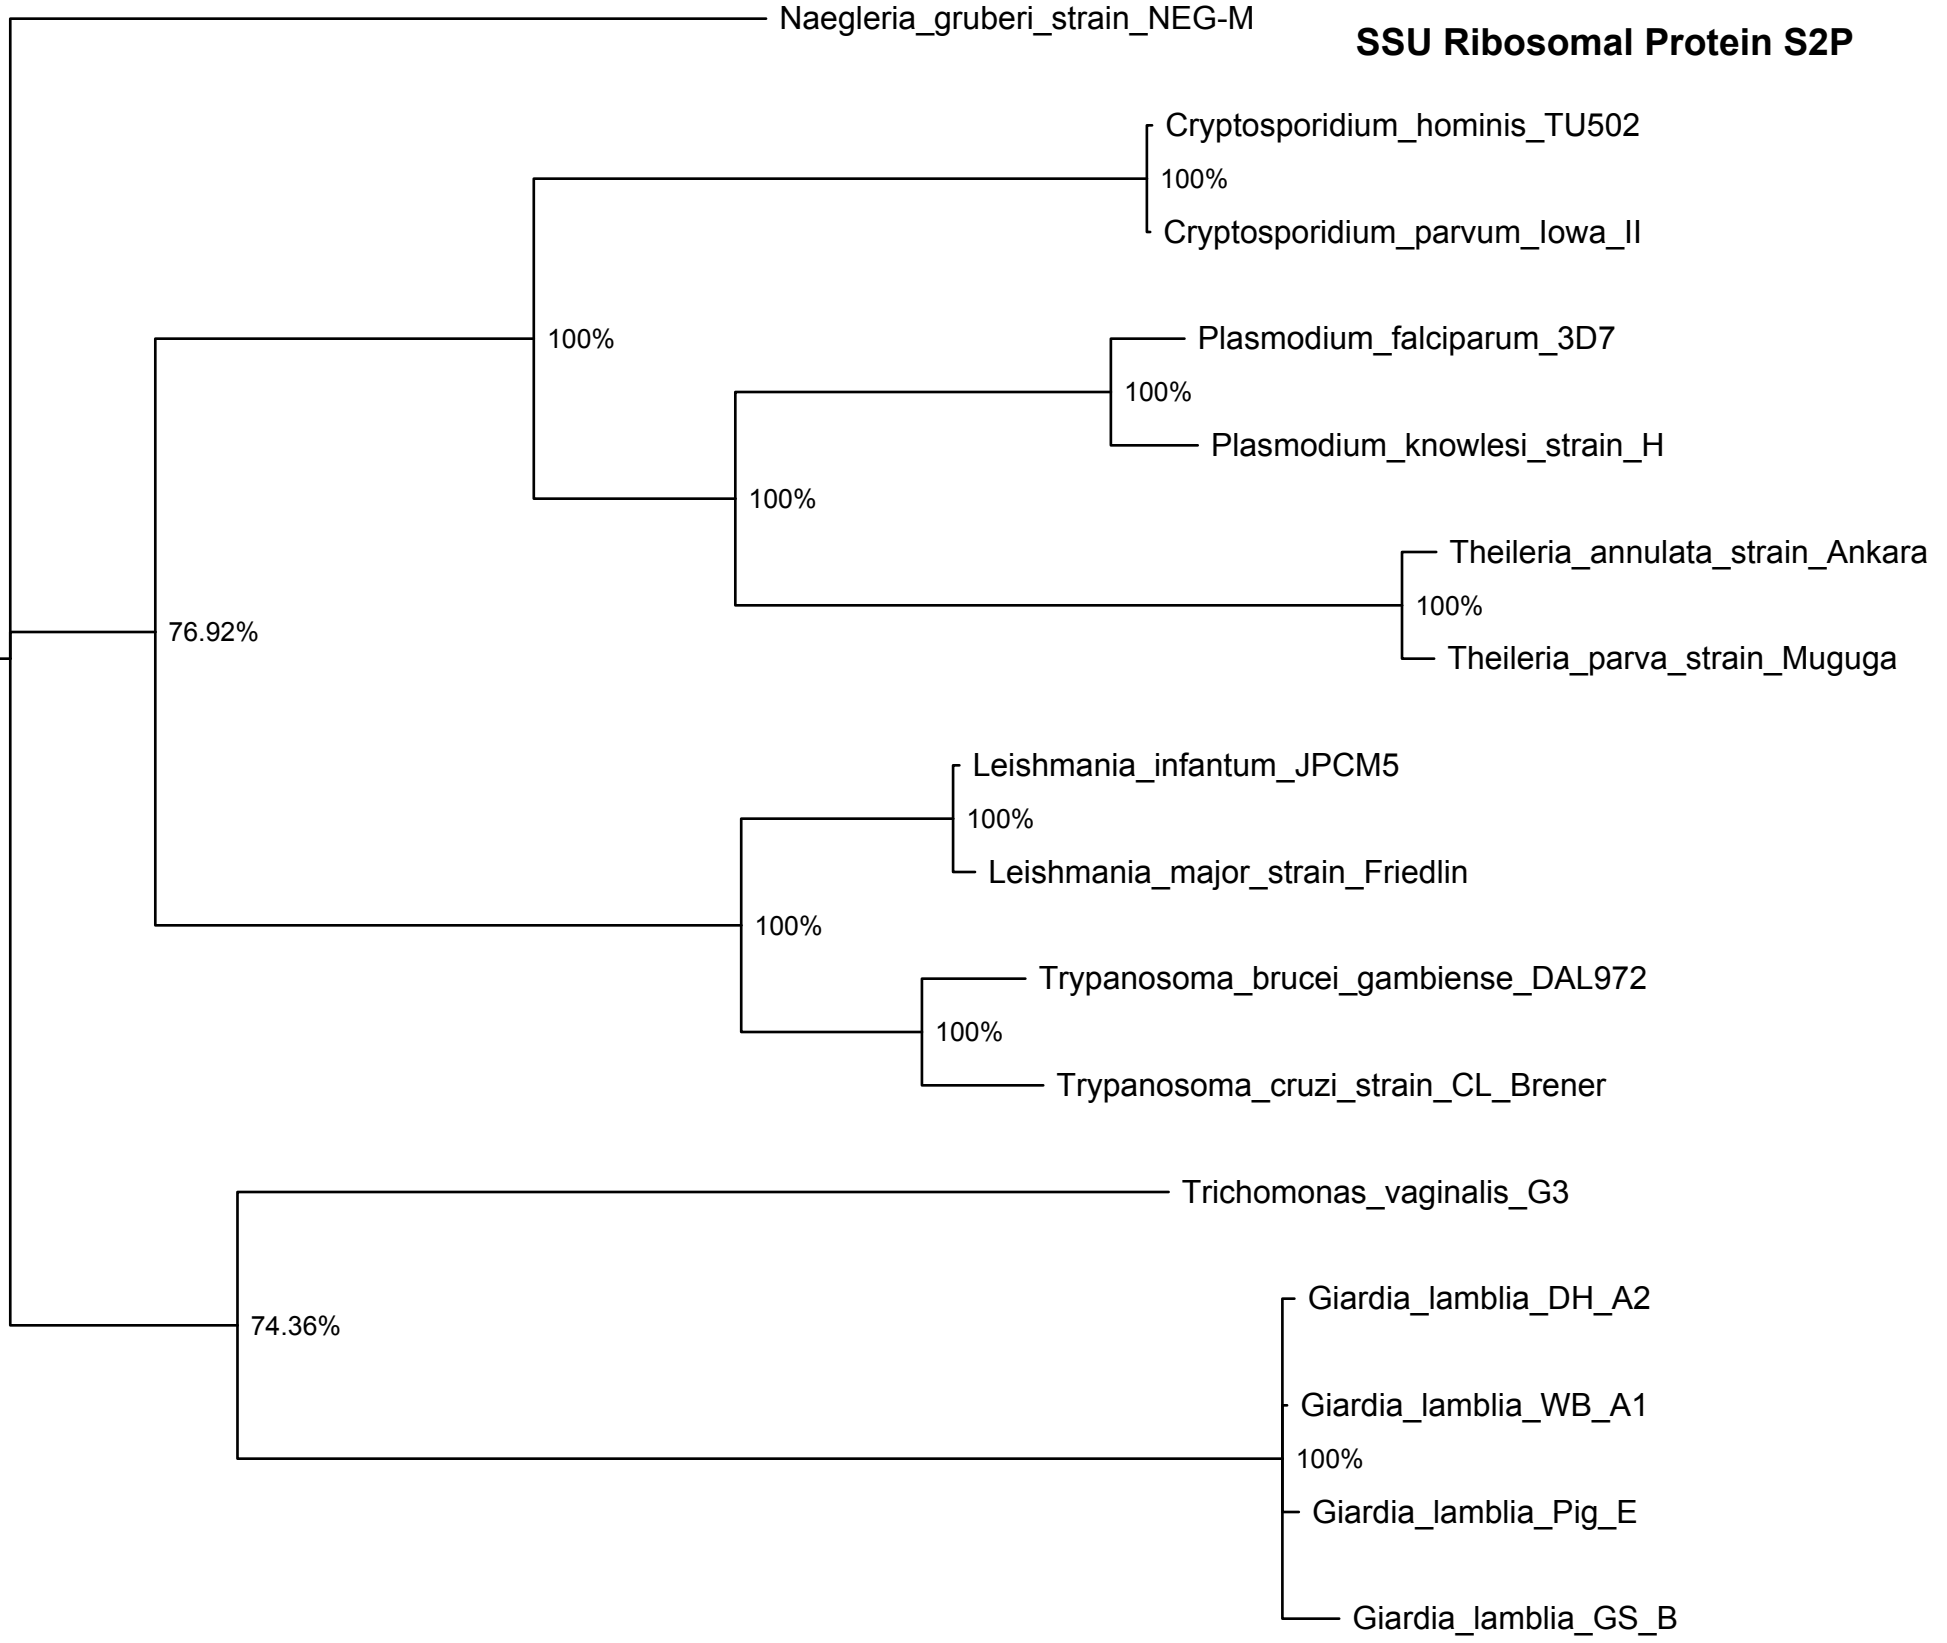

0.07

**SSU Ribosomal Protein S15**

Naegleria\_gruberi\_strain\_NEG-M

Cryptosporidium\_hominis\_TU502  
100%  
Cryptosporidium\_parvum\_lowa\_II

Leishmania\_infantum\_JPCM5  
100%  
Leishmania\_major\_strain\_Friedlin

82.46%  
100%  
Trypanosoma\_brucei\_gambiense\_DAL972  
Trypanosoma\_cruzi\_strain\_CL\_Brener

95.61%  
100%  
Plasmodium\_falciparum\_3D7  
Plasmodium\_knowlesi\_strain\_H

90.35%  
100%  
Theileria\_annulata\_strain\_Ankara  
Theileria\_parva\_strain\_Muguga

80.7%

100%

Trichomonas\_vaginalis\_G3

Giardia\_lamblia\_DH\_A2  
Giardia\_lamblia\_WB\_A1  
70.1%  
Giardia\_lamblia\_Pig\_E  
100%  
Giardia\_lamblia\_GS\_B

0.09

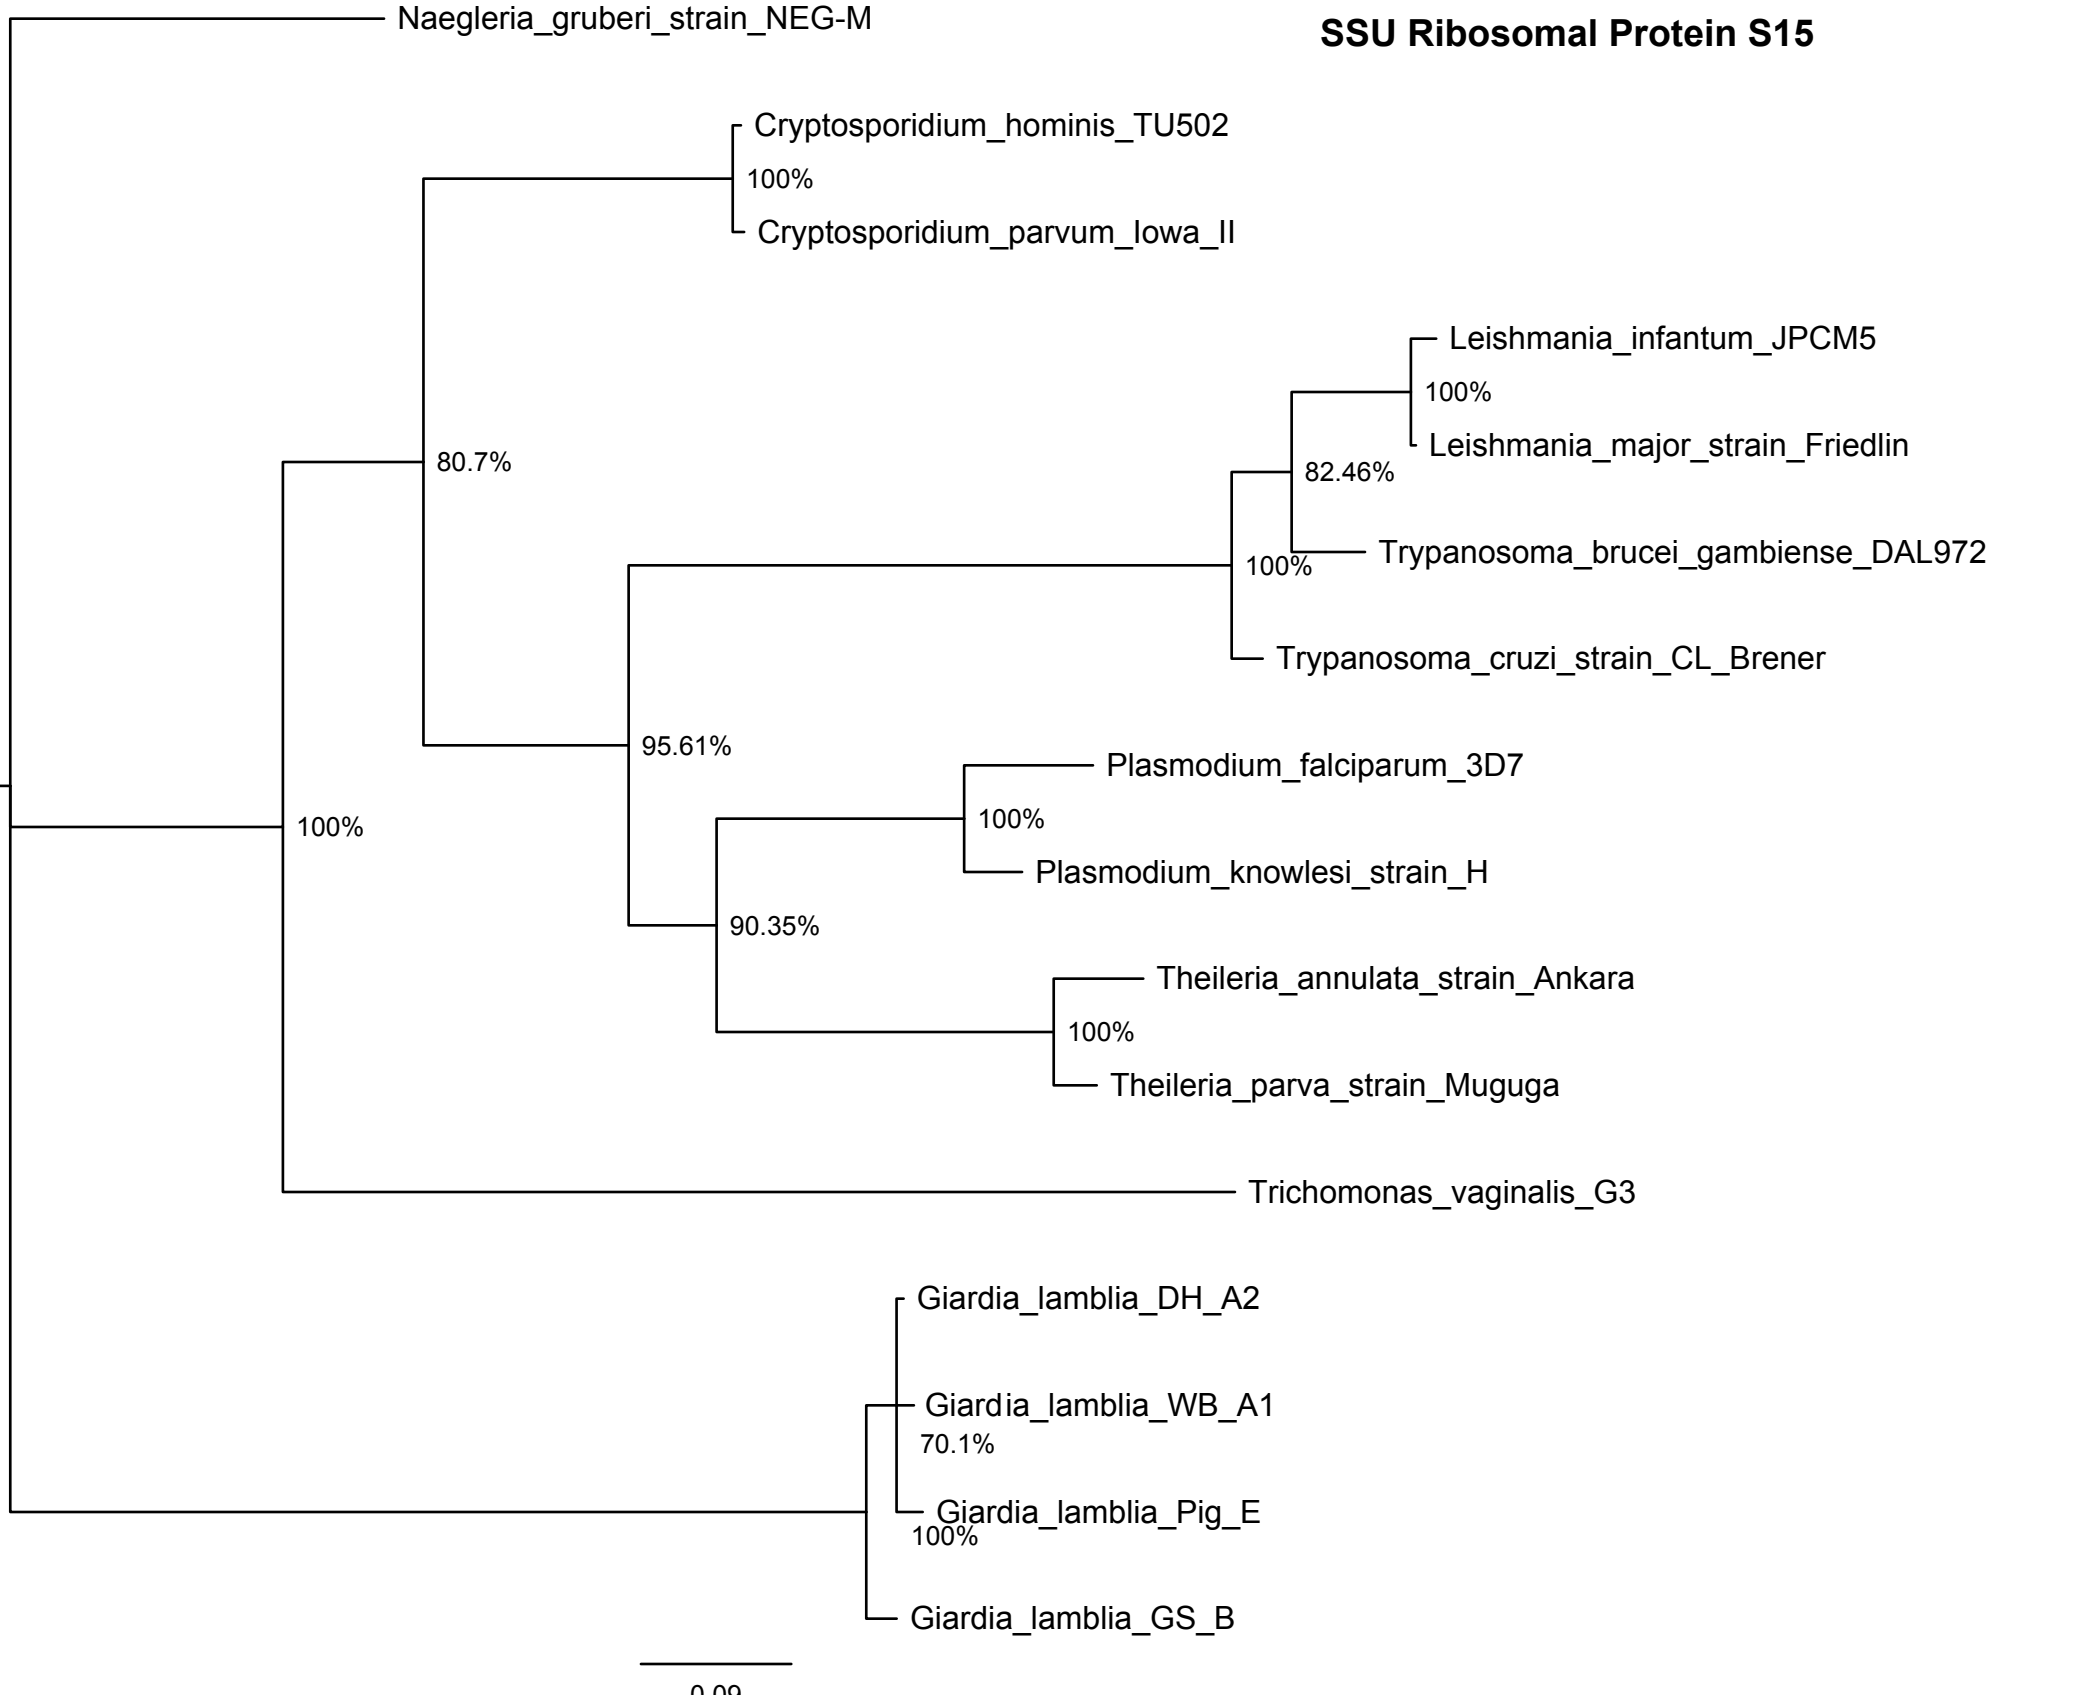

# SSU Ribosomal Protein S15P

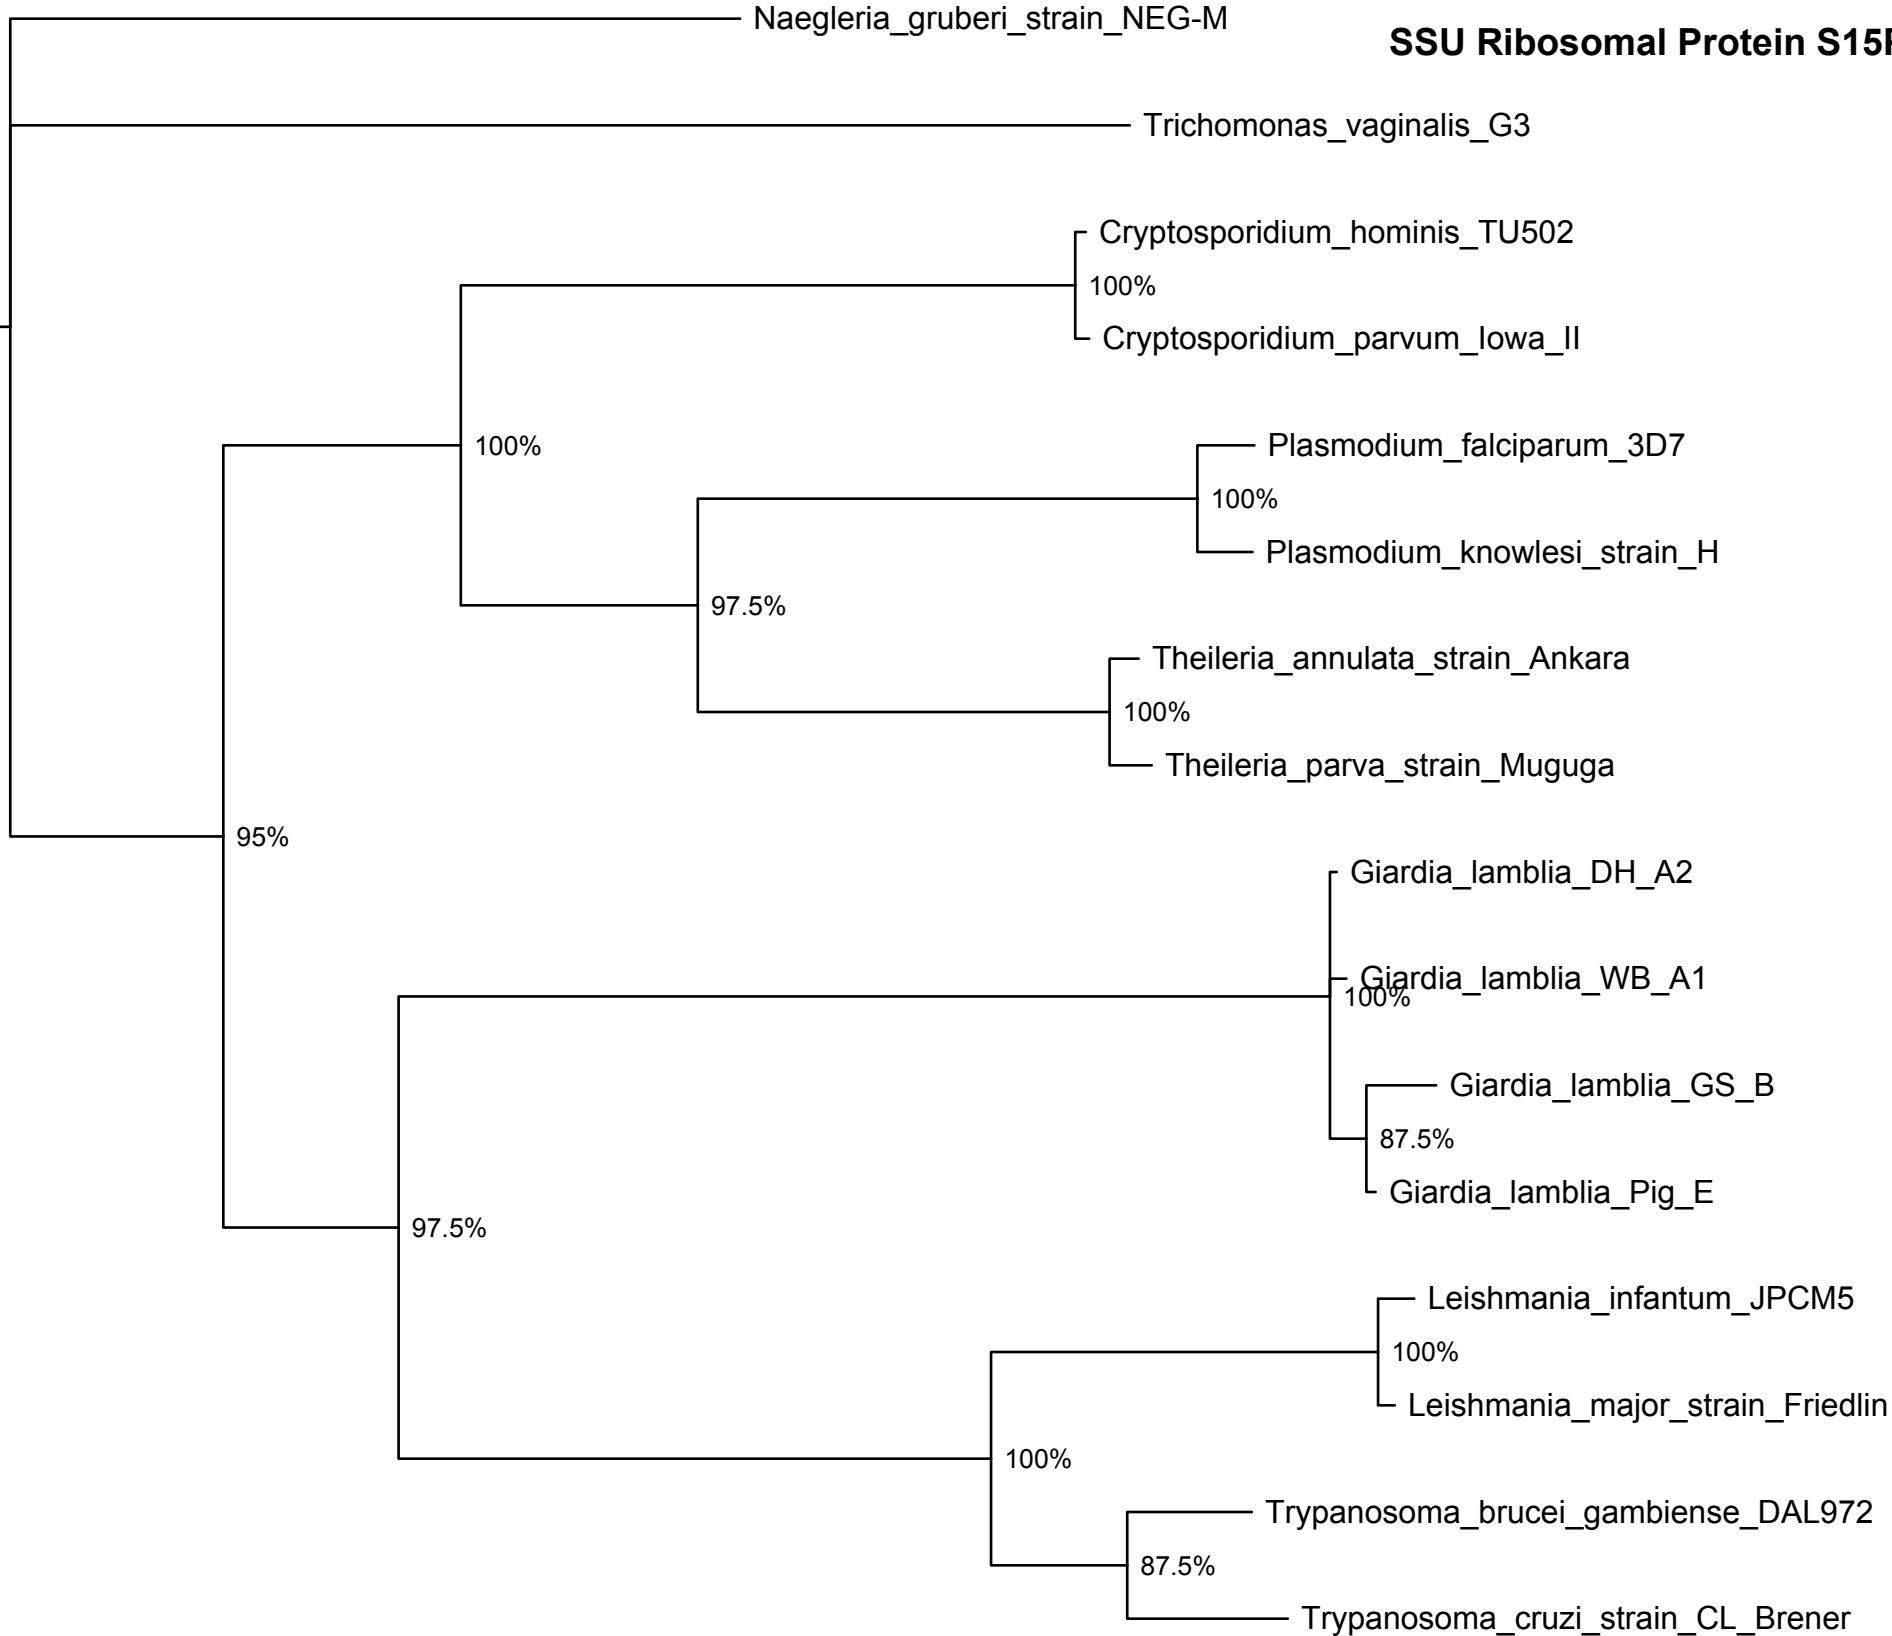

0.05



# S-Adenosylmethionine Synthetase

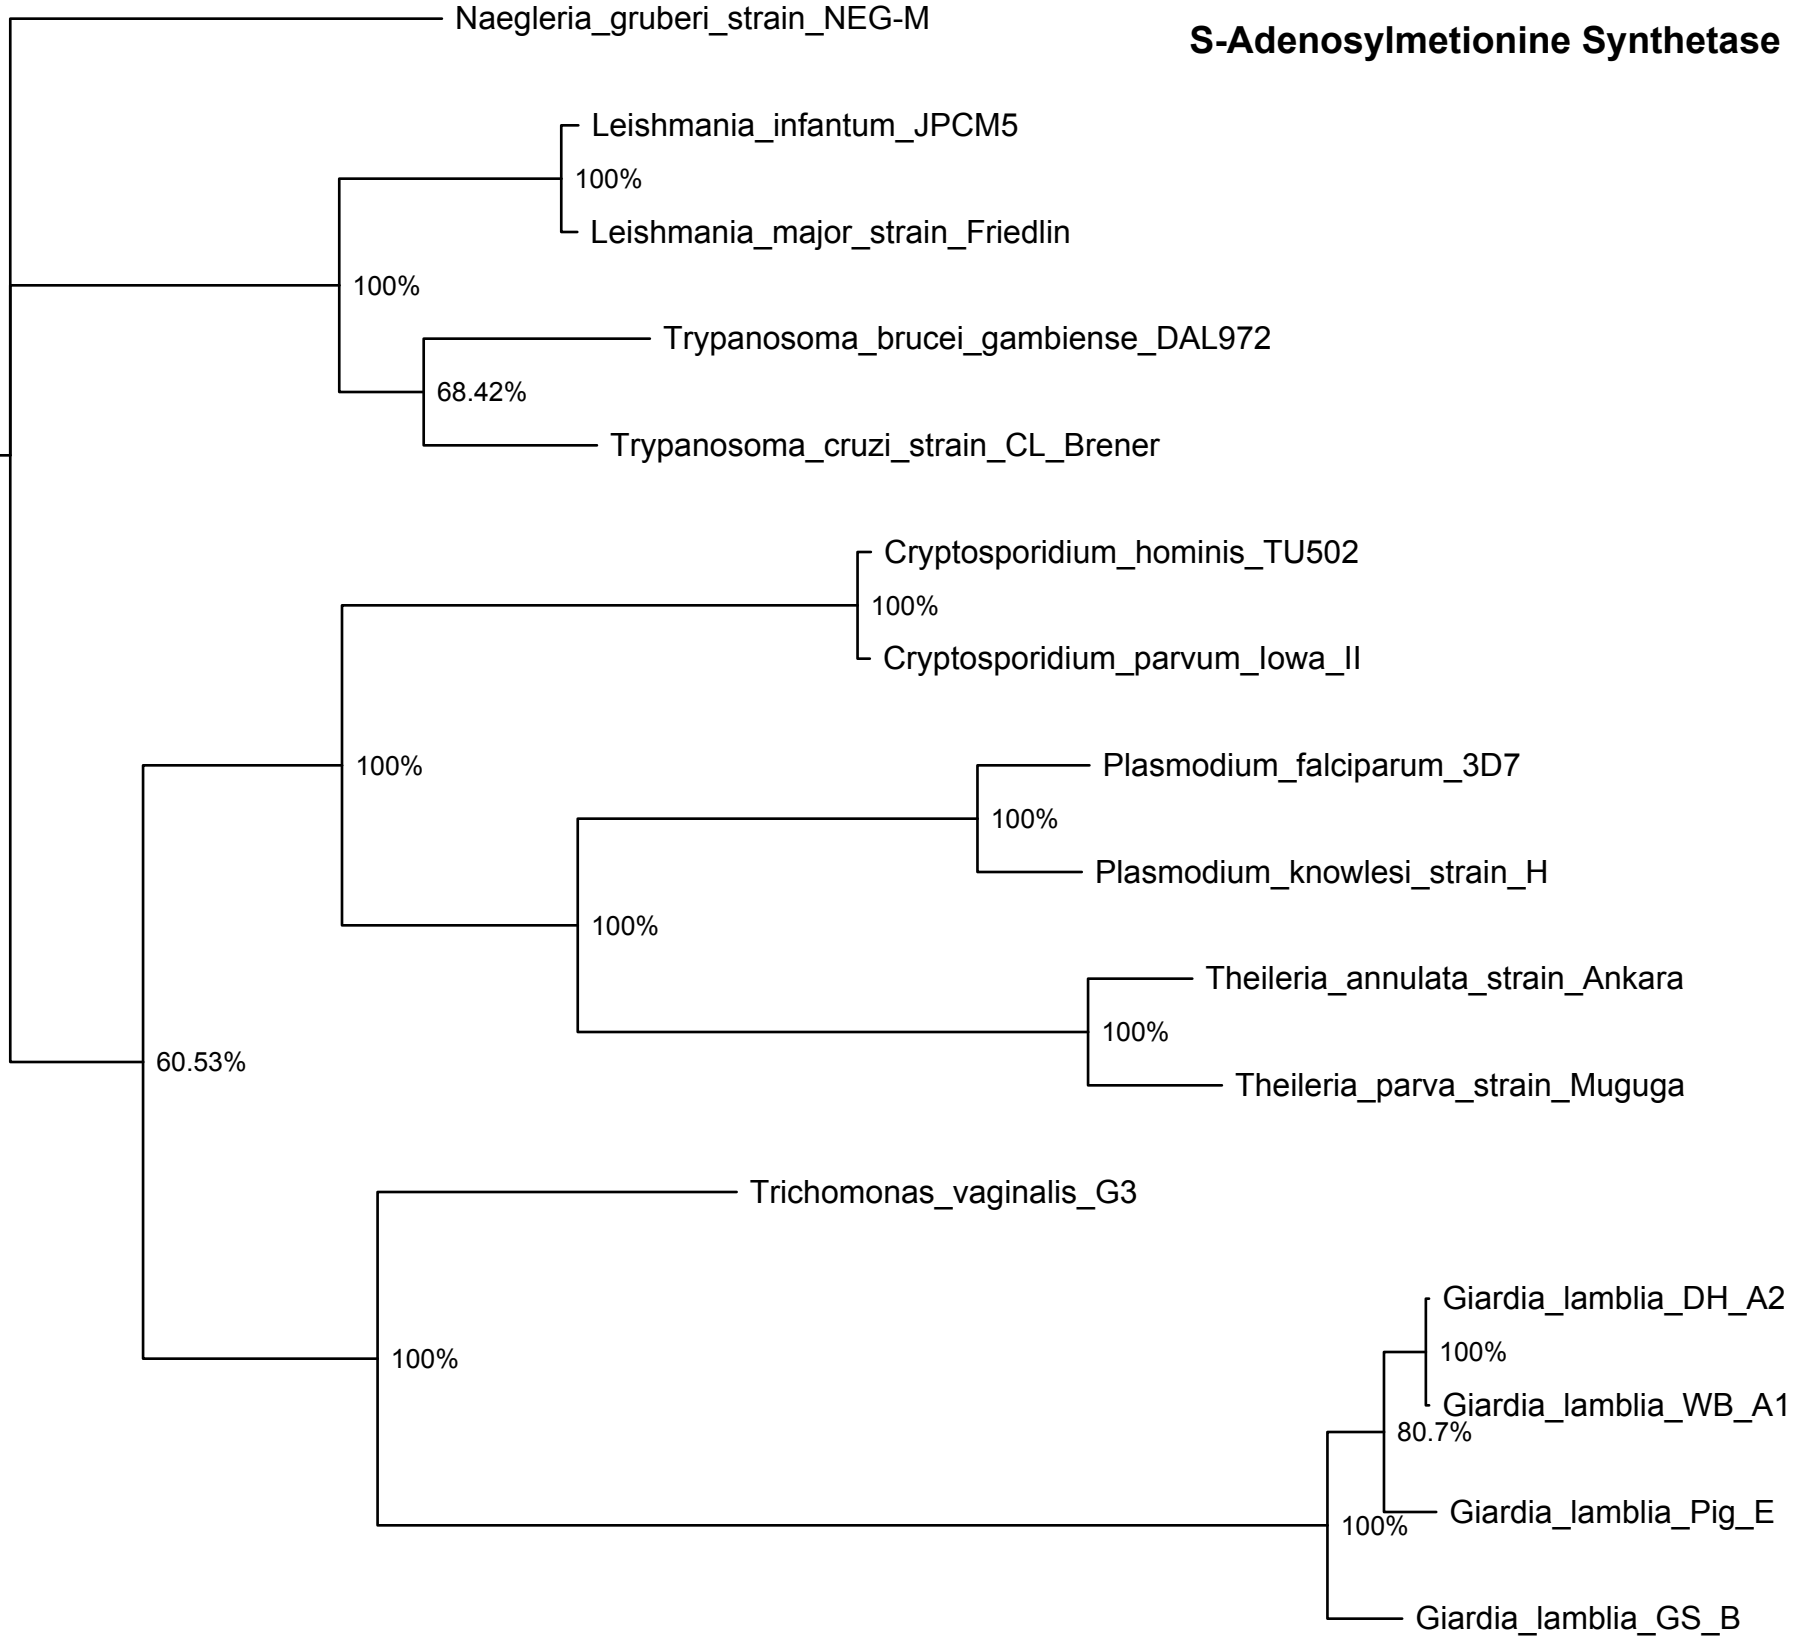

# Trios-Phosphate Isomerase

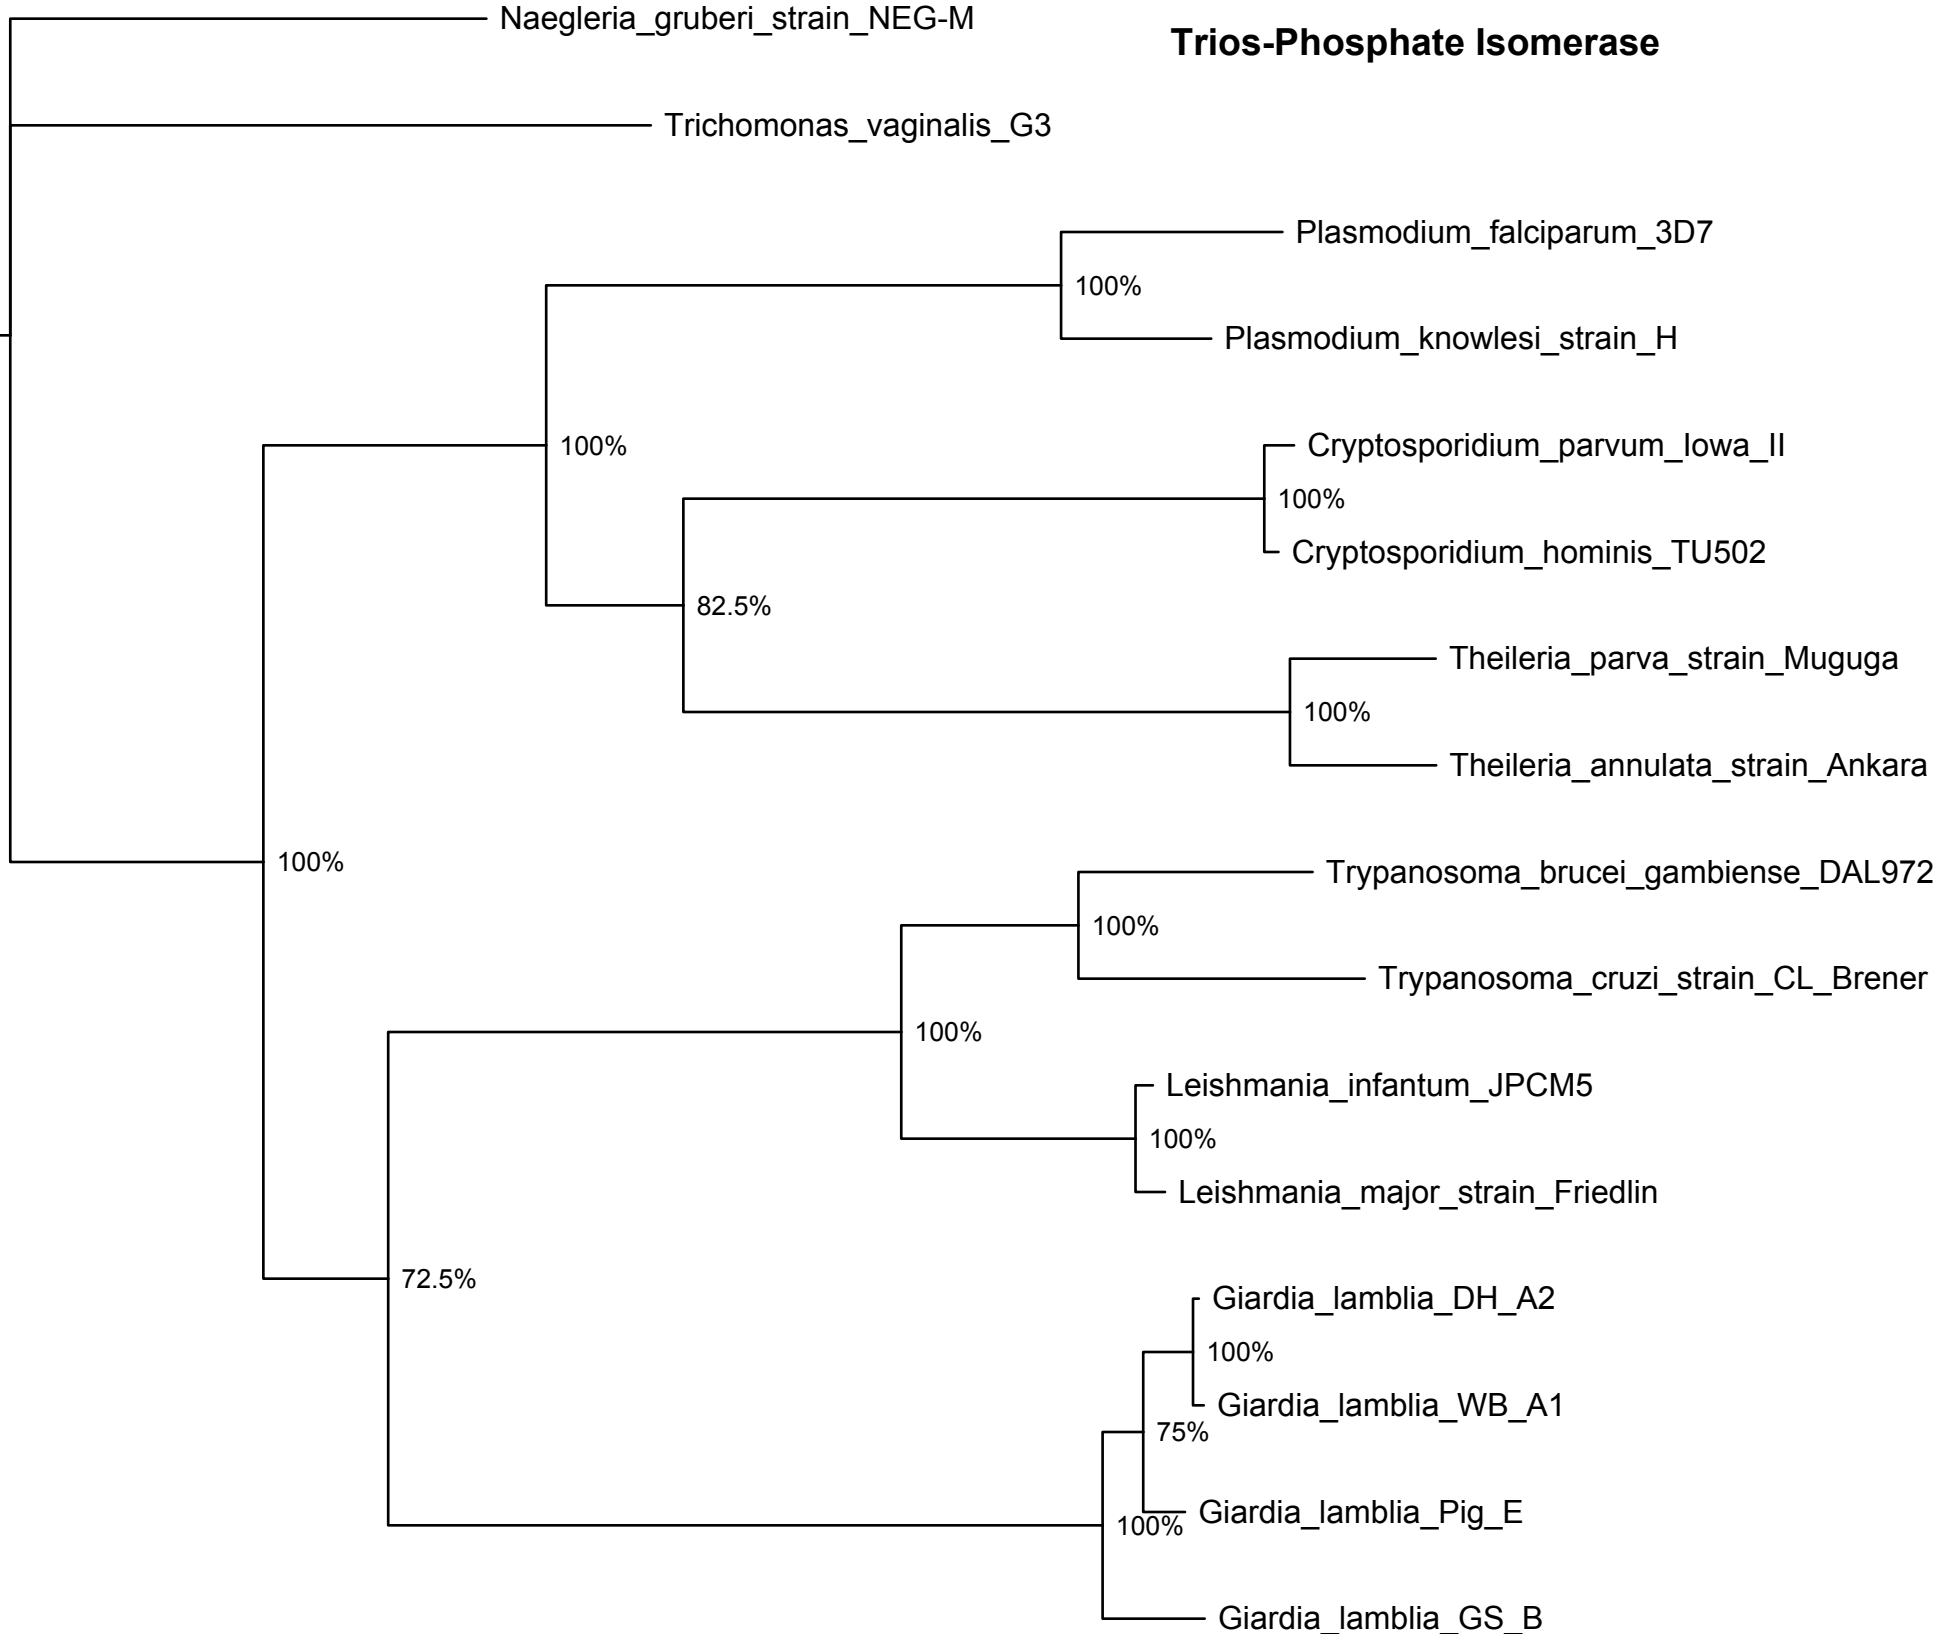

0.09

# Alpha Tubulin

Naegleria\_gruberi\_strain\_NEG-M

Leishmania\_infantum\_JPCM5

100%

Leishmania\_major\_strain\_Friedlin

100%

Trypanosoma\_brucei\_gambiense\_DAL972

100%

Trypanosoma\_cruzi\_strain\_CL\_Brener

Giardia\_lamblia\_DH\_A2

Giardia\_lamblia\_WB\_A1

100%

Giardia\_lamblia\_GS\_B

Giardia\_lamblia\_Pig\_E

100%

Trichomonas\_vaginalis\_G3

100%

Cryptosporidium\_hominis\_TU502

100%

Cryptosporidium\_parvum\_lowa\_II

100%

Plasmodium\_falciparum\_3D7

100%

Plasmodium\_knowlesi\_strain\_H

100%

Theileria\_annulata\_strain\_Ankara

100%

Theileria\_parva\_strain\_Muguga

0.02

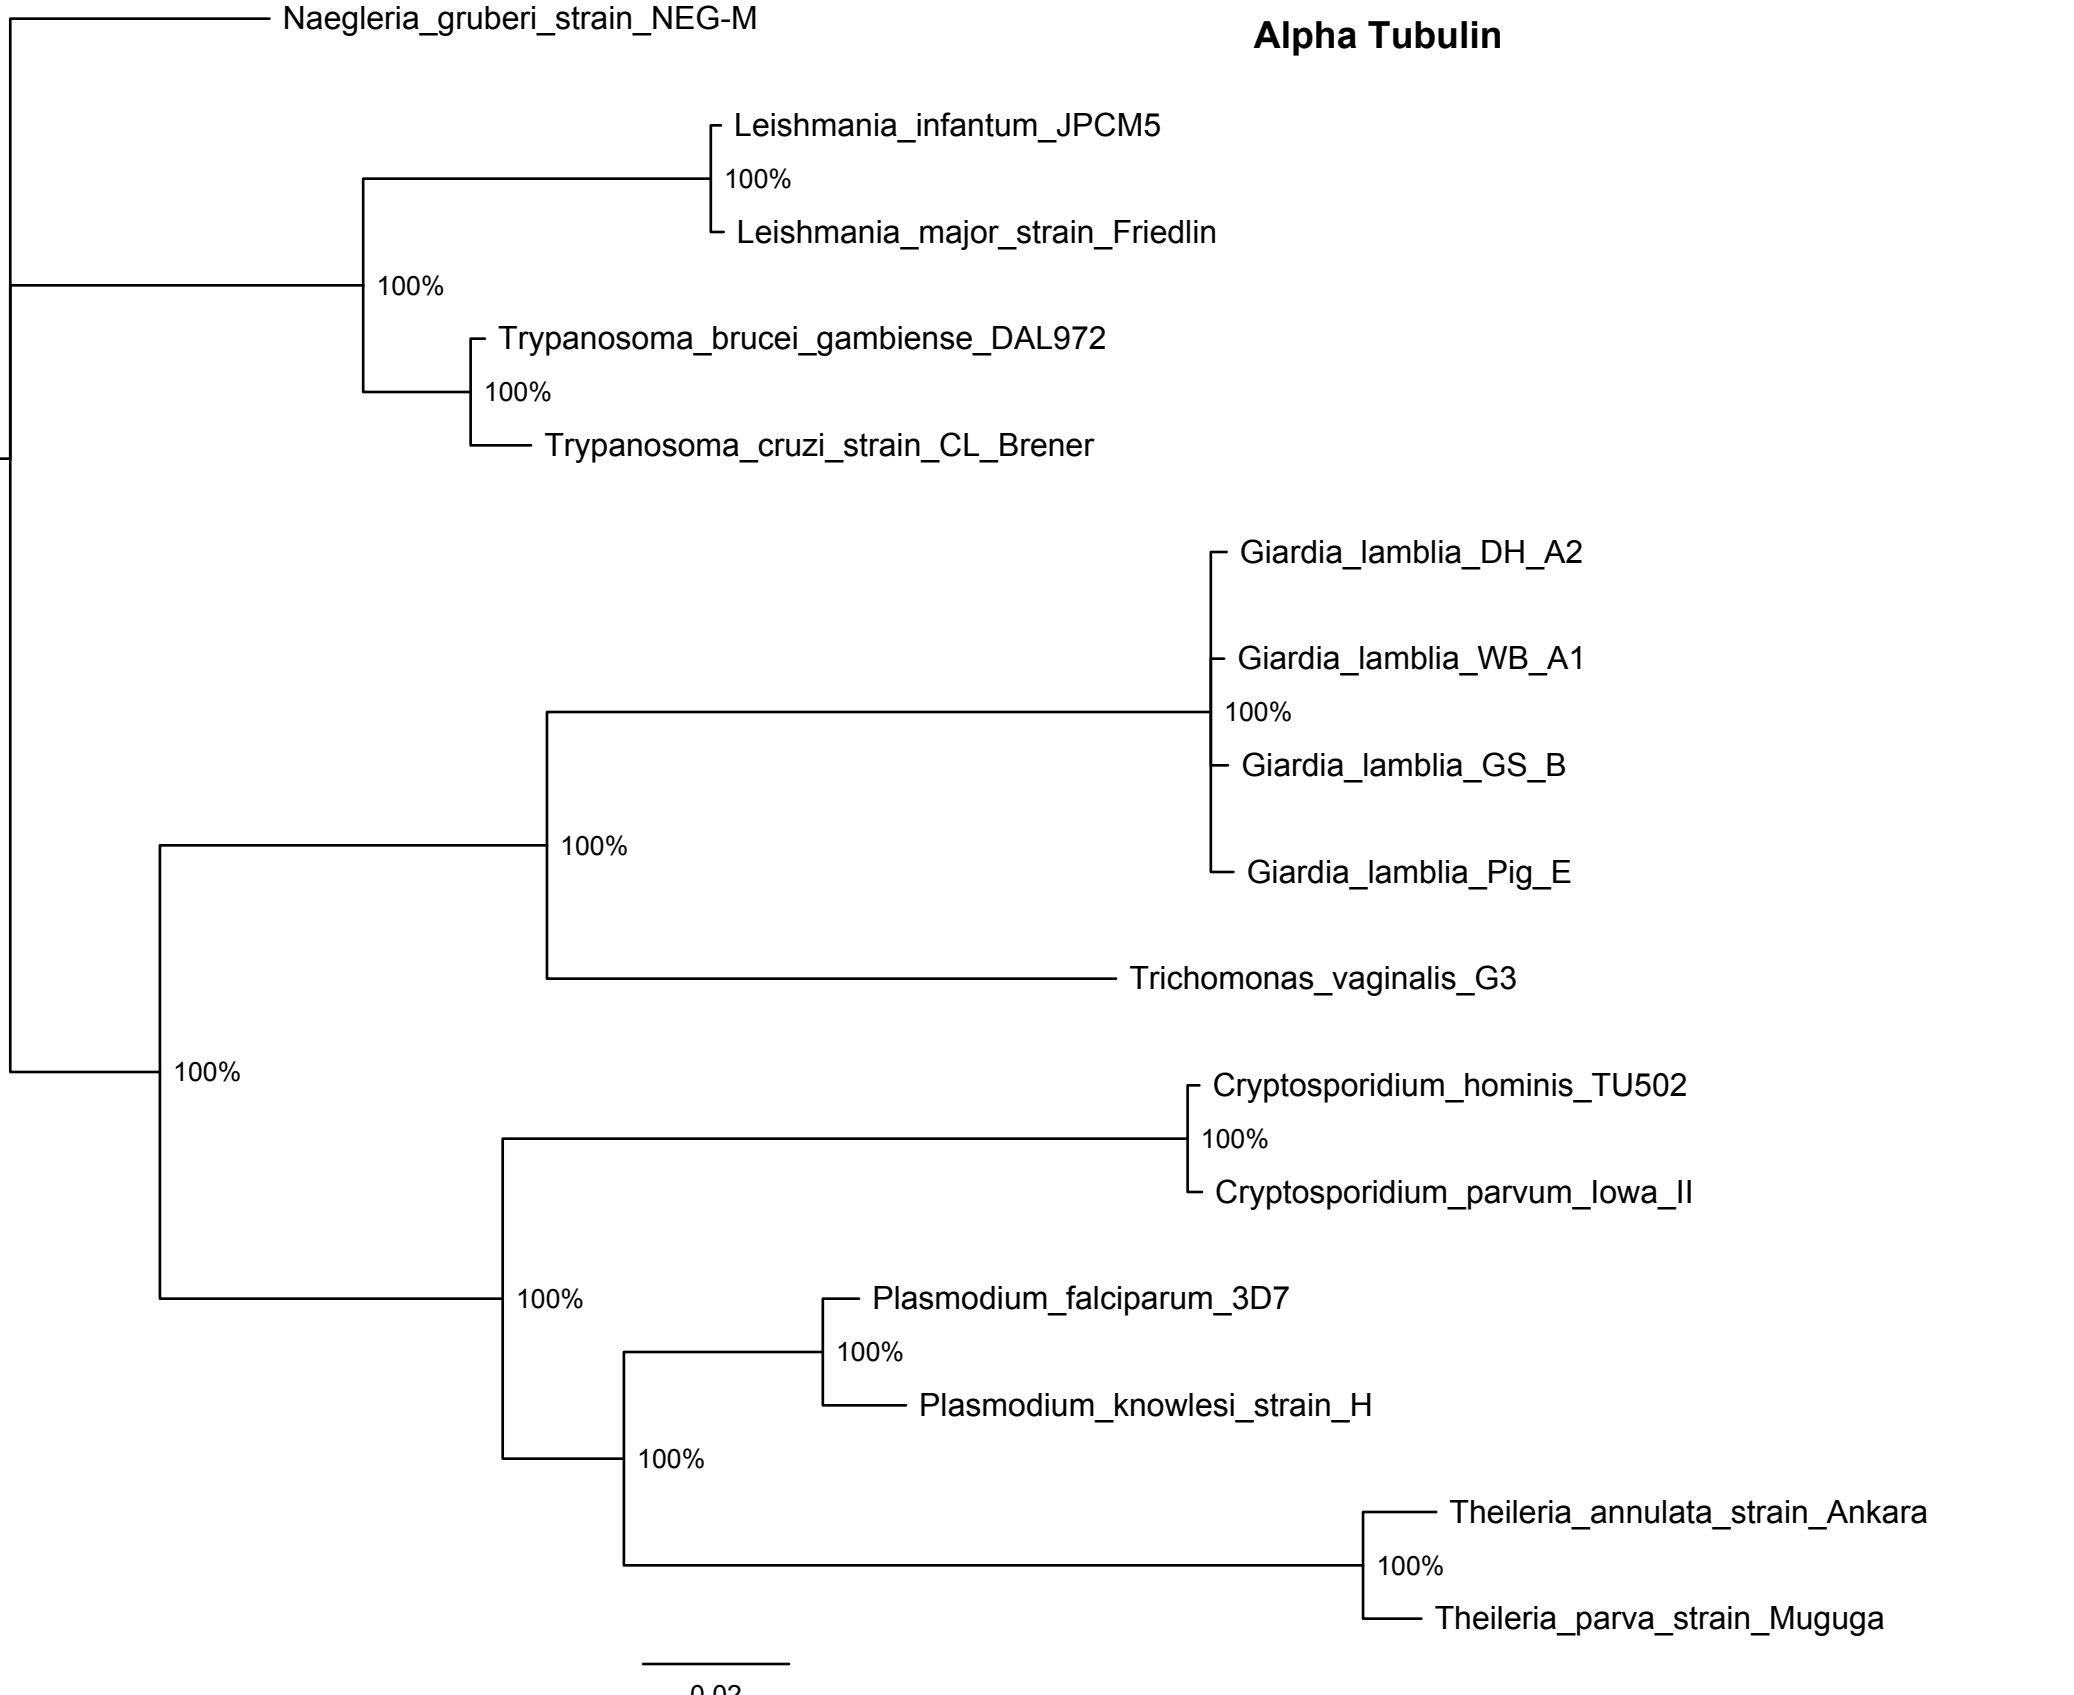

# Concatenated Genes

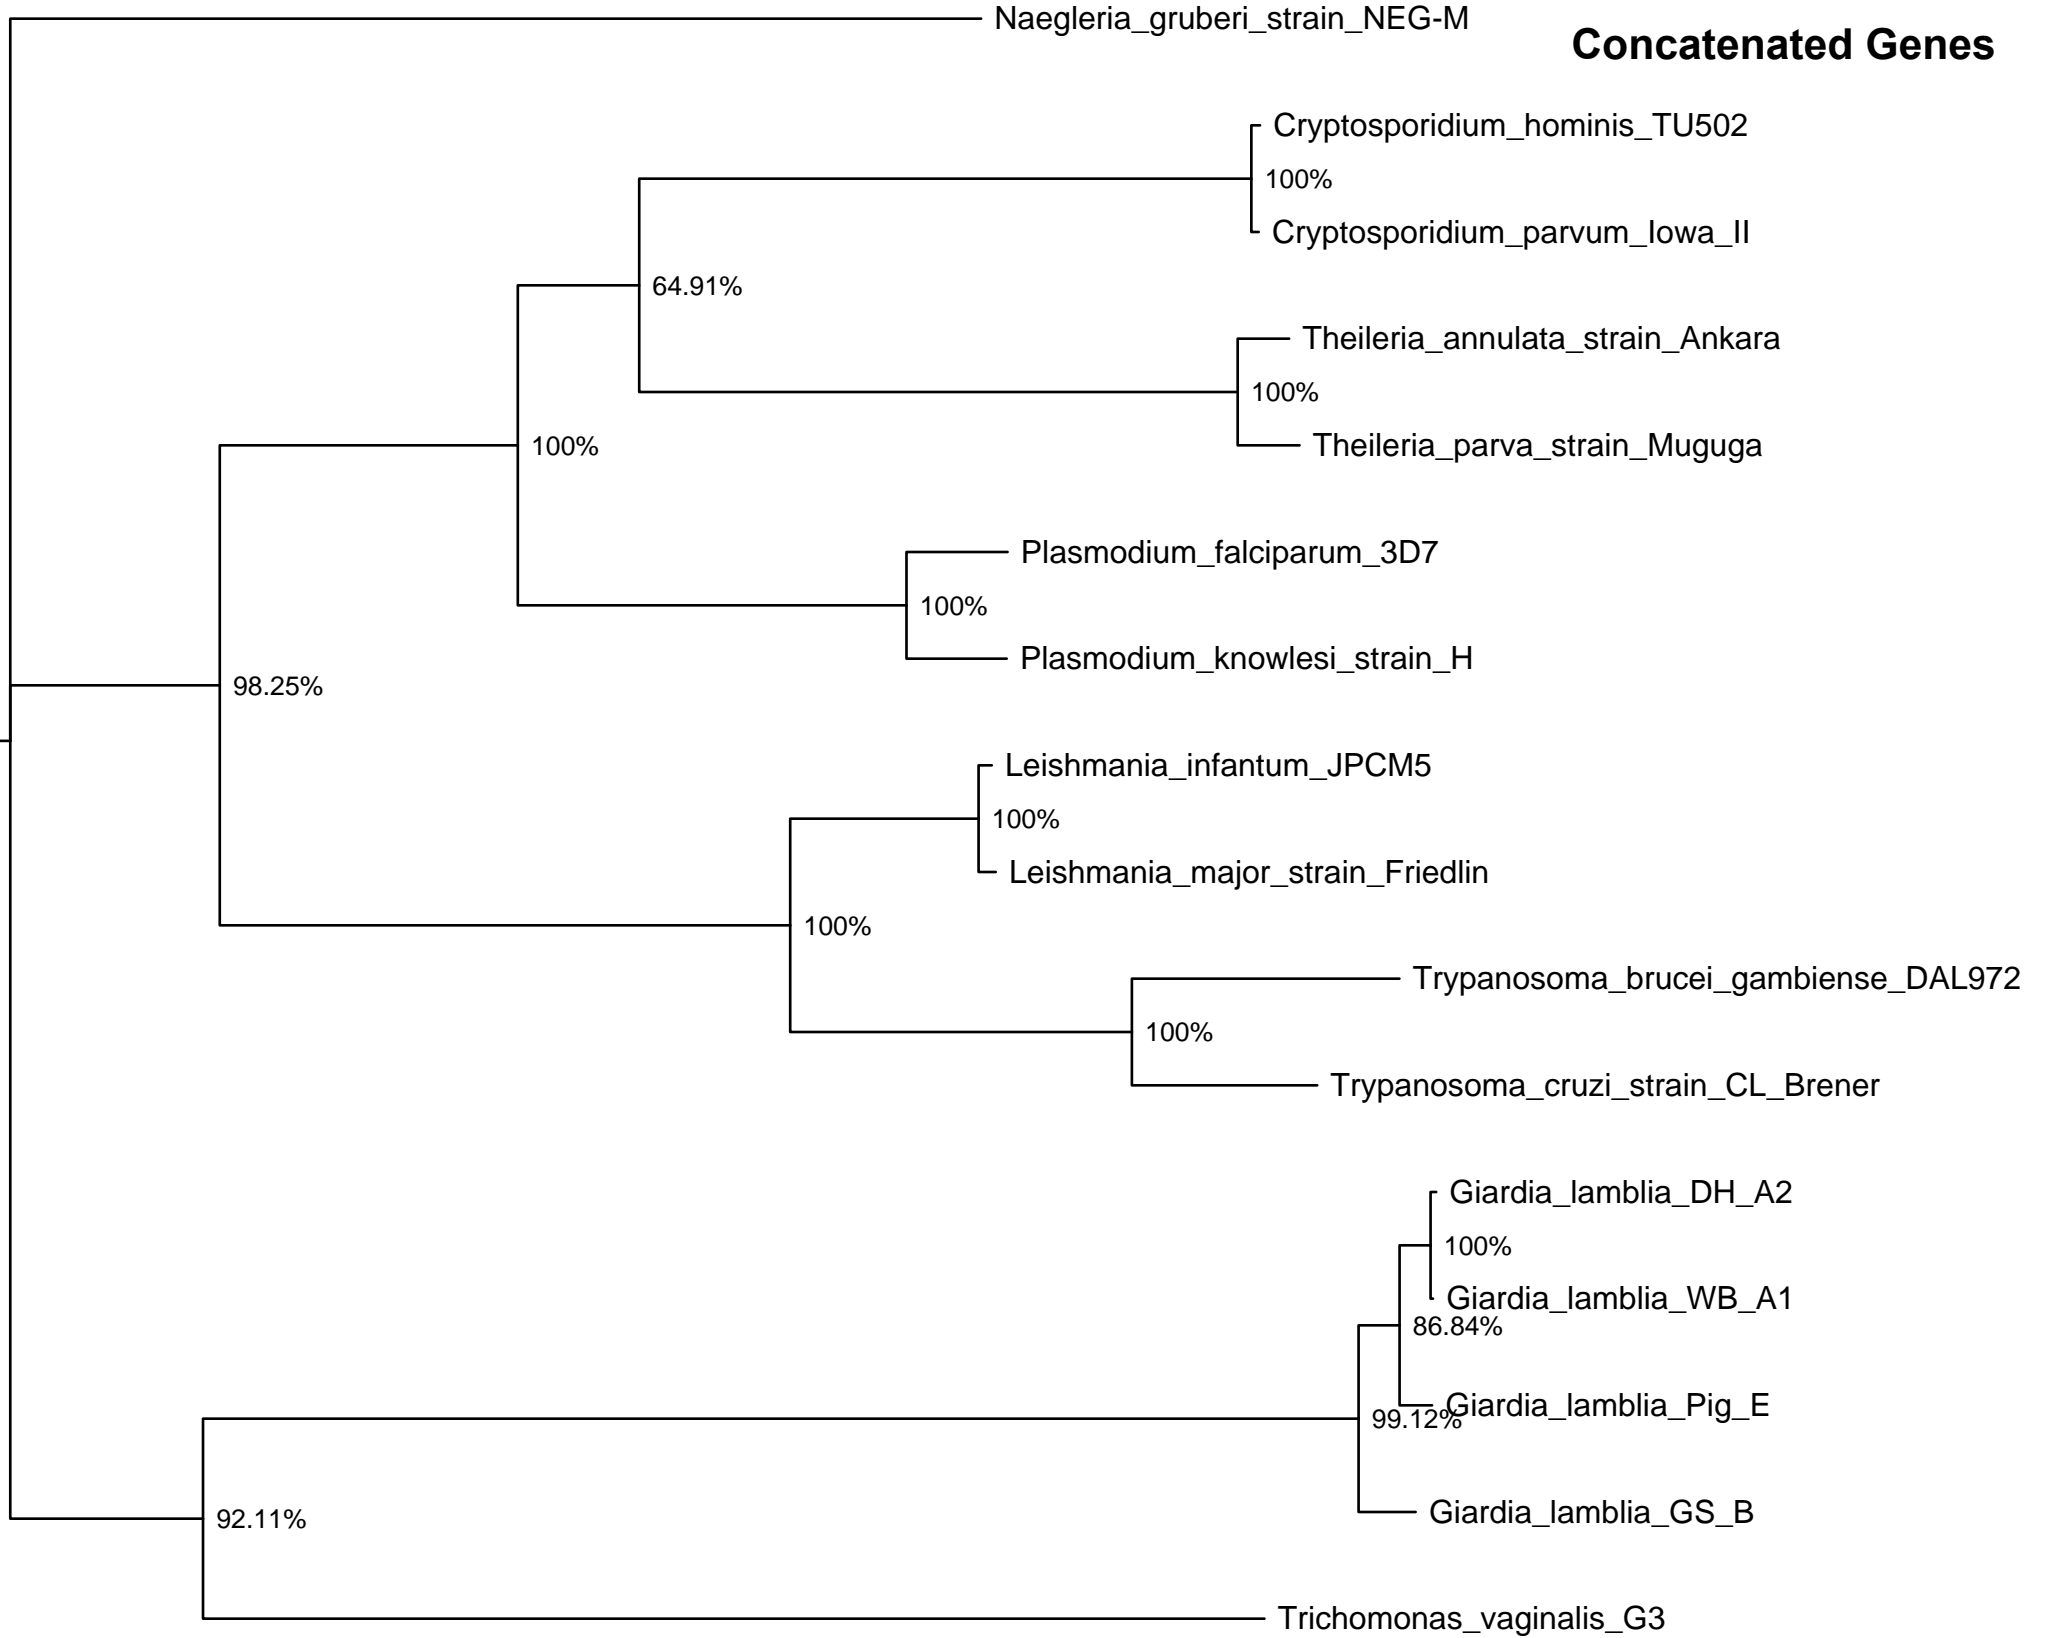

0.1
