# Supplementary material
Source: PubMed Central journal article supplement (PMC3879983)
Supplement: supp_evt197_Supplementary_File_2c.pdf [file supp_evt197_Supplementary_File_2c.pdf]

Sec61 Alpha Subunit

1 10 20 30 40 50 60
-----MAKGSRLLDLLRPAMAILPEVAKPSKTVKFQEKVLWTAVALF
-----MAKGLRFLNLIKPALCVIPEVSSPDRRVPFKERVLTWLTISLF
-----MAKGLRFLNLIKPALCVIPEVSSPDRRVPFKERVLTWLTISLF
-----MVRFLNLIKPVMFLLPEVQSPDRKLPFKEKLLWTAVALF
-----MFLLEPVQSPDRKLPFKEKLLWTAVALF
-----MGKGCFFNQLF-----TKLVLFKEMLMWTTGMSLF
-----MGKGRVNLNIKPIMPILPEVKTPTKRVLFKEMLMWTTGMSLF
-----MTKQANWMLSLKPLMLAVLPEIEKPRRMPGIKERIMWTAVALF
-----MTKQANWMLSLKPLMLAVLPEIEKPRRVPGIKERIMWTAVALF
-----MTDILMKMSPILAFLEPVATPLRVVPIRERIMWTFVALF
-----MKNYMMMAQPILALLPEVSRPQRIPPIKERIMWTAVALF
-----MGFDILKSIRPVLELMPNVPRPNKKVPIRKRLFYTFASLA
--MLQFVKSQKRKTRGRGARMVATWLVLDPWARMPLPSVEKAPKTVRFTTKGLYTFLLALI
--MLQFVKSQKRKTRGRGARMVATWLVLDPWARMPLPSVEKAPKTVRFTTKGLYTFLLALI
--MLQFVKSQKRKTRERGARMVATWLVLDPWARMPLPSVEKAPKTVRFTTKGLYTFLLALI
MTCIQFVKSQKRKRRYKAEEMVATWLVLDPWARMPLPSVEKAPKSVRFTTKGLYTFLLALI

Naegleria gruberi strain NEG-M
Cryptosporidium hominis TU502
Cryptosporidium parvum Iowa II
Plasmodium falciparum 3D7
Plasmodium knowlesi strain H
Theileria annulata strain Ankara
Theileria parva strain Muguga
Leishmania infantum JPCM5
Leishmania major strain Friedlin
Trypanosoma brucei gambiense DAL972
Trypanosoma cruzi strain CL Brener
Trichomonas vaginalis G3
Giardia lamblia DH\_A2
Giardia lamblia WB\_A1
Giardia lamblia Pig\_E
Giardia lamblia GS\_B

IYLVCCQIPVYGI RNASSSDPLYWMRVILASNRGTMELGISPVITAGLI IQLLSGARLI
VFLVCCQIPLYGVLSSKSSDPFYWVRVILASNRGTMELGISPIVTSMMVMQLLAGSKII
VFLVCCQIPLYGVLSSKSSDPFYWVRVILASNRGTMELGISPIVTSMMVMQLLAGSKII
VFLICCCQIPLYGIVTSKLSDDPFYWMRVILASNRGTMELGISPIVTSMMVMQLLAGSKII
VFLICCCQIPLYGIVTSKLSDDPFYWMRVILASNRGTMELGISPIVTSMMVMQLLAGSKII
IFLVCCQIPIYGAITNKSSDPFYWMRVILASNRGTMELGISPIVTSMMVMQLLAGSKII
IFLVCCQIPIYGAITNKSSDPFYWMRVILASNRGTMELGISPIVTSMMVMQLLAGSKII
VFLICCCQVPVYGARPGNASDPFYWMRIVLASNKGTLMELGISPIVSASLIELELAGVRIL
VFLICCCQVPVYGARPGQASDPFYWMRVVILASNKGTLMELGISPIVTSASLVMELLVGVRIL
IFLVCCQVPVYGARPGQTSDDPFYWMRVVILASNKGTLMELGISPIVTSASLIMELLSGVKII
VYLICTLVPLVYGQKTAGDDPMQHLRLTASSKYSLMEFGISPIVTSGMILQFLCSFGLI
VYLTASQVPLYGLHSSIRKDPFLWLRISIFAGQRGSLMELGIGPTITSSFFLKILISSKVL
VYLTASQVPLYGLHSSIRKDPFLWLRISIFAGQRGSLMELGIGPTITSSFFLKILISSKVL
VYLTASQVPLYGLHSSIRKDPFLWLRISIFAGQRGSLMELGIGPTITSSFFLKILISSKVL
VYLTASQVPLYGLHASIRKDPFLWLRISIFAGQRGSLMELGIGPTITSSFFLKILISSKLL

Naegleria gruberi strain NEG-M
Cryptosporidium hominis TU502
Cryptosporidium parvum Iowa II
Plasmodium falciparum 3D7
Plasmodium knowlesi strain H
Theileria annulata strain Ankara
Theileria parva strain Muguga
Leishmania infantum JPCM5
Leishmania major strain Friedlin
Trypanosoma brucei gambiense DAL972
Trypanosoma cruzi strain CL Brener
Trichomonas vaginalis G3
Giardia lamblia DH\_A2
Giardia lamblia WB\_A1
Giardia lamblia Pig\_E
Giardia lamblia GS\_B

DVDENSQEDQILLNGAQKF FGLIMTIVEAVAYVASGMYGDVDRDLGLVTALLIVLQLFVAG
DVDQSLKEDRALFQGAQKLFGLLITLGEAVAYVISGMYGDIRTIGAWNAILIIIIQLFFAG
DVDQSLKEDRALFQGAQKLFGLLITLGEAVAYVISGMYGDIRTIGAWNAILIIIIQLFFAG
DVDQSLKEDRTL FQGAQKLLGLLITLGEAIAYVISGIYGNISEIGTGHAI IIIIQLFFAG
DVDQSLKEDRTL FQGAQKLLGLLITLGEAIAYVVSIGIYGNISEIGTGHAI IIIIQLFFAG
DVDQSLKEDRDLYQAAEKLGLLVTLGEAVAYVVSIGIYGNISEIGTGHAI IIIIQLFFAG
DVDQSLKEDRDLYQAAEKLGLLVTLGEAVAYVVSIGIYGNISEIGTGHAI IIIIQLFFAG
TYDPNNERERAVFEGFQKMMGLVITAVEAVAYVSSGMYGDPSRIGVVMCGLIVLQLMVAT
TYDQNNRERERAVFEGFQKMMGLVITAVEAVAYVSSGMYGDPSRIGVVMCGLIVLQLMVAT
SYDINNKRERAVYEGVQKIVALFITIVEATAYVSSGMYGDVREIGVFMCGLIVLQLTFTAT
SYDVNDKREAVFEGIQKIALFITAVEAMAYVSSGMYGDVREIGTIMSGFIVLQMLLAT
NRNPSDEPEASALFDAAGKLLGLLITLGEAVAYVISGMYGDIRTIGAWNAILIIIIQLFFAG
PFDKNNEVESQVFNVRQNLIGFI FTFFQAVLYVLAGIYGSISQIGLFSAVAI IAQLTISS
PFDKNNEVESQVFNVRQNLIGFI FTFFQAVLYVLAGIYGSISQIGLFSAVAI IAQLTISS
PFDKNNEVESQVFNVRQNLIGFI FTFFQAVLYVLAGIYGSISQIGMFSAVAI IAQLTISS
PFDRSNEAESQAFNVRQNLIGFI FTFFQAVLYVLAGIYGSISQIGLFSAVAI IAQLTISS

Naegleria gruberi strain NEG-M
Cryptosporidium hominis TU502
Cryptosporidium parvum Iowa II
Plasmodium falciparum 3D7
Plasmodium knowlesi strain H
Theileria annulata strain Ankara
Theileria parva strain Muguga
Leishmania infantum JPCM5
Leishmania major strain Friedlin
Trypanosoma brucei gambiense DAL972
Trypanosoma cruzi strain CL Brener
Trichomonas vaginalis G3
Giardia lamblia DH\_A2
Giardia lamblia WB\_A1
Giardia lamblia Pig\_E
Giardia lamblia GS\_B

IVCLLDELLELQKGYGLGSGISLFIATNICETIIWKSFSFSPSTINTGRGTEFEGAI IALFHM
VVVILLDELLELQKGYGLGSGISLFIATNICETI VWKAFSPTTINTGRGTEFEGAVIALFHL
VVVILLDELLELQKGYGLGSGISLFIATNICETI VWKAFSPTTINTGRGTEFEGAVIALFHL
VVVILLDELLELQKGYGLGSGISLFIATNICETI MWKSFSPTTINTDKGIEFEGAIISLIYC
VVVILLDELLELQKGYGLGSGISLFIATNICETI MWKSFSPTTINTDKGIEFEGAIISLIYC
VVVILLFDEMLQKGYGLGSGISLFIATNICETI LWKAFSPTTISTDKGTEFEGALISLFCY
VVVILLFDEMLQKGYGLGSGISLFIATNICETI LWKAFSPTTISTDKGTEFEGALISLFCY
MICILLDELLELQKGYGIGSGTSLFIATNVCDTIIWKAFFSPTINTGRGAEFEGAI IAFFHL
MICILLDELLELQKGYGIGSGTSLFIATNVCDTIIWKAFFSPTINTGRGAEFEGAI IAFFHL
MYCILLDELLELQNGWGLGAGTSLFIATNICDTIIWKCFSPTINTGRGSEFEGAI IAFFHL
LICILLDELLELQKGYGLGAGTSLFIATNICDTIIWKSFSPTINTGRGAEFEGAI IAFFHL
IVVILLDELLELQNGYIGSGISLFICTNICEMIMWRLFSFNHYSMGRGTEYGLVIAFFHY
ILVQVLDEMLENGWIGSGISLFTTANVCENIIWKSFSFRRIDRGNKGEFEGAVLA AVHY
ILVQVLDEMLENGWIGSGISLFTTANVCENIIWKSFSFRRIDRGNKGEFEGAVLA AVHY
ILVQVLDEMLENGWIGSGISLFTTANVCENIIWKSFSFRRIDRGNKGEFEGAVLA AVHY
ILVQVLDEMLENGWIGSGISLFTTANVCENIIWKSFSFRRIDRGNKGEFEGAI LA AVHY

Naegleria gruberi strain NEG-M
Cryptosporidium hominis TU502
Cryptosporidium parvum Iowa II
Plasmodium falciparum 3D7
Plasmodium knowlesi strain H
Theileria annulata strain Ankara
Theileria parva strain Muguga
Leishmania infantum JPCM5
Leishmania major strain Friedlin
Trypanosoma brucei gambiense DAL972
Trypanosoma cruzi strain CL Brener
Trichomonas vaginalis G3
Giardia lamblia DH\_A2
Giardia lamblia WB\_A1
Giardia lamblia Pig\_E
Giardia lamblia GS\_B

LITRSDKVRALKEAFYRPNL PNITNLLATILVFLIVIVYFQGRVVELPLRSSRQ-SGSAGA
LFTKPKDISALREAFYRSHATNMTNLLATVFLVFLIVIVYFQGRVLDLAVKYQKV-RGQQGS
LFTKPKDISALREAFYRSHATNMTNLLATVFLVFLVFLIVIVYFQGRVLDLAVKYQKV-RGQQGS
LFTESNKSALKKAFYRTHAPNVNLLATILVFLVFLIVYIQGRVLDLAVKYQSV-RGQQGT
LFTESNKSALKKAFYRTHAPNVNLLATILVFLVFLIVYIQGRVLDLAVKYQSV-RGQQGT
FFTCKNKL SAFKEAFYRNHAPNVNLLATALIFVIVYIQGRVLDLAVKYQSM-RGQRGT
FFTCKNKL SAFKEAFYRNHAPNVNLLATALIFVIVYIQGRVLDLAVKYQSM-RGQRGT
LVSRDTKVRALKEAFYRPNLPNL TNIFSTAVVAVVVVFFQGRVPLMTKSKFN-GNDRQP
LVSRDTKVRALKEAFYRPNLPNL TNIFSTAVVAVVVVFFQGRVPLMTKSKFN-GNDRQP
LVSRDTKVRALKEAFYRPNLPNL TNIFSTAVVAVVVVFFQGRVPLMTKSKFN-GNDRQP
LVTRTDKVRALKEAFYRPNLPNL TNVFATVLLFAVVVFLQGRVPLMTKSRNA-AADRQP
LVSRSDKMRALKEAFYRPNLPNL TNIFATLVFAVVVFFQGRVPLMTKSRNA-AADRQP
LFTRNKLRALRDIVFRPQLPNLCQLFSTVIVFGACIYFDQIKINVGLETTVN-RARPEP
MFTQPNKLKAIKLAFFRDGLTNVMNIIATLVVFLVAIYIYLGQIKRNLRIQHAKAGPSVQQQ
MFTQPNKLKAIKLAFFRDGLTNVMNIIATLVVFLVAIYIYLGQIKRNLRIQHAKAGPSVQQQ
MFTQPNKLKAIKLAFFRDGLTNVMNIIATLVVFLVAIYIYLGQIKRNLRIQHAKAGPSVQQQ
MFTQPNKLKAIKLAFFRDGLTNLMNIIATLVVFLVAIYIYLGQIKRNLRIQHAKAGPSVQQQ

Naegleria gruberi strain NEG-M
Cryptosporidium hominis TU502
Cryptosporidium parvum Iowa II
Plasmodium falciparum 3D7
Plasmodium knowlesi strain H
Theileria annulata strain Ankara
Theileria parva strain Muguga
Leishmania infantum JPCM5
Leishmania major strain Friedlin
Trypanosoma brucei gambiense DAL972
Trypanosoma cruzi strain CL Brener
Trichomonas vaginalis G3
Giardia lamblia DH\_A2
Giardia lamblia WB\_A1
Giardia lamblia Pig\_E
Giardia lamblia GS\_B

YPIRLFYTSNMP IILQ TALVSNLYFFSQLLYRRFKS-NMLVNILGQWQELDVG----GQS
FPIKLFYTSNIP IILQ TALVSNLYFFSQLLYRRFKS-NMLVNILGQWQELDVG----GQS
FPIKLFYTSNIP IILQ TALVSNLYFFSQLLYRRFKS-NMLVNILGQWQELDVG----GQS
YPIKLFYTSNIP IILQ TALVSNLYFFSQILYKRKFN-SILVNLLGQWQEVESSE----GTS
YPIKLFYTSNIP IILQ TALVSNLYFFSQILYKRKFN-SILVNLLGQWQEVESSE----GTS
YPIKLFYTSNIP IILQ TALVSNLYFFSQILYKRKFN-NLFANLLGQWQETD-H----GTS
YPIKLFYTSNIP IILQ TALVSNLYFFSQILYKRKFN-NLFANLLGQWQETD-H----GTS
YMIKLFYTSNMP IILQ TS SVVSNISFFSQILSRRFGNRNFLINLLGRWEERGYNGGGNGQL
YMIKLFYTSNMP IILQ TS SVVSNISFFSQILSRRFGNRNFLINLLGRWEERGYNGGGNGQL
YIIKLFYTSNMP IILQ TS SVVSNINFFSQILSRRFGQFNFLINLLGRWESRAYS--QSQQM
YMIKLFYTSNMP IILQ TS SVVSNINFFSQILSRRFGQHNFLINLLGRWESRAYS--QSQQM
FEIKLFYCSNTPLIIQSTILSQLAGFSRTIYFHWPESLATAQIFGVWRSHNGMS--YDYS
YPIRLLYASSTPMMIISTLTSNVFMISQAIWRRFGN-SIFTALLGTWAEVESRP---GQA
YPIRLLYASSTPMMIISTLTSNVFMISQAIWRRFGN-SIFTALLGTWAEVESRP---GQA
YPIRLLYASSTPMMIISTLTSNVFMISQAIWRRFGN-SIFTALLGTWAEVESRP---GQA
YPIRLLYASSTPMMIISTLTSNVFMISQAIWRRFGN-SIFTALLGTWAEVESRP---GQA

Naegleria gruberi strain NEG-M
Cryptosporidium hominis TU502
Cryptosporidium parvum Iowa II
Plasmodium falciparum 3D7
Plasmodium knowlesi strain H
Theileria annulata strain Ankara
Theileria parva strain Muguga
Leishmania infantum JPCM5
Leishmania major strain Friedlin
Trypanosoma brucei gambiense DAL972
Trypanosoma cruzi strain CL Brener
Trichomonas vaginalis G3
Giardia lamblia DH\_A2
Giardia lamblia WB\_A1
Giardia lamblia Pig\_E
Giardia lamblia GS\_B

VPVGGIYYISPPGNL NEMLVDP IHAIIYIAFMLGSCALFSRIWINVSGSSPKDVARQLK
IPVGGIAYYISPPNSLVDVSDPIHTFFYISFVLISCALFSKWTWIEVSGSSAKDVAKQLR
IPVGGIAYYISPPNSLVDVSDPIHTFFYISFVLISCALFSKWTWIEVSGSSAKDVAKQLR
IPIGGIAYYISPPNSFADITNDP FHTLVYISFVLVACAFFSKTWIEVSGSSAKDVAKQLR
IPIGGIAYYISPPNSFADITNDP FHTLVYISFVLVACAFFSKTWIEVSGSSAKDVAKQLR
IPIGGIAYYISPPNSFADITNDP FHTLVYISFVLVACAFFSKTWIEVSGSSAKDVAKQLR
VPIGGIAYYLSPPSTFKDIINDPLHTLLYITFVLVSCAVFSKWTWIEISGSSARDVAKQLR
VPIGGIAYYLSPPSTFKDIINDPLHTLLYITFVLVSCAVFSKWTWIEISGSSARDVAKQLR
VPIGGIAYYLVPPATFYDLLADPIHAIFVYVFLVTSKAVFSRLWITISHTAPRDVAKQLA
FPVGGIAYYLVPPATFYDLLADPIHAIFVYVFLVTSKAVFSRLWITISHTAPRDVAKQLA
YPVGGIAYYLVPPATFYDMINDPVHAVLYIVFVILFSCATFSKLVVAISHTGPRDVAKRLV
FPVGGIAYYLVPPATFYDLLADPIHAIFVYVFLVTSKAVFSRLWITISHTGPRDVAKRLV
TPVSGIYYLVPPATFYDMINDPVHAVLYIVFVILFSCATFSKLVVAISHTGPRDVAKRLV
FPTGGLAWILASPYSLRSALFHPVHTLHVAITLVALSGLISRVMVEFSGEGAKEVAEMLE
FPTGGLAWILASPYSLRSALFHPVHTLHVAITLVALSGLISRVMVEFSGEGAKEVAEMLE
FPTGGLAWILASPYSLRSALFHPVHTLHVAITLVALSGLISRVMVEFSGEGAKEVAEMLE
FPTGGLAWILASPYSLRSALFHPVHTLHVAITLVALSGLISRVMVEFSGEGAKEVAEMLE

Naegleria gruberi strain NEG-M
Cryptosporidium hominis TU502
Cryptosporidium parvum Iowa II
Plasmodium falciparum 3D7
Plasmodium knowlesi strain H
Theileria annulata strain Ankara
Theileria parva strain Muguga
Leishmania infantum JPCM5
Leishmania major strain Friedlin
Trypanosoma brucei gambiense DAL972
Trypanosoma cruzi strain CL Brener
Trichomonas vaginalis G3
Giardia lamblia DH\_A2
Giardia lamblia WB\_A1
Giardia lamblia Pig\_E
Giardia lamblia GS\_B

EQQLNIAGHRDPPKEMINTLNKYIPTAAAVGGMCI GALTIVADFLGAI GSGTGILLAVGI
DQQMIMKGYRDS--SLVQVLNRYIPTAAAFGGMCIGALTIIADFLGAI GSGTGILLAVTI
DQQMIMKGYRDS--SLVQVLNRYIPTAAAFGGMCIGALTIIADFLGAI GSGTGILLAVTI
DQQIGMRGRDTPS LTRVFNRYIPTAAAFGGMCIGALTIIADFLGAI GSGTGILLAVTI
DQQIGMRGRDTPS LTRVFNRYIPTAAAFGGMCIGALTIIADFLGAI GSGTGILLAVTI
DQRIGMVGHRDTPS LTKVFSRYVPTAAAFGGMCIGALTIIADFLGAI GSGTGILLAVTI
DQRIGMVGHRDTPS LTKVFSRYVPTAAAFGGMCIGALTIIADFLGAI GSGTGILLAVTI
SQGRWLVAQARESEDDMTRLLEKYIPVAASFGLCVGALTIFADFLGAI GSGTGILLAVTI
SQGRWLVAQARESEDDMTRLLEKYIPVAASFGLCVGALTIFADFLGAI GSGTGILLAVTI
SEGRWLAQARESEDDMARLLEKYIPVAASFGLCVGALTIFADFLGAI GSGTGILLAVTI
AEGRWLAQARESEDDMARLLEKYIPVAASFGLCVGALTIFADFLGAI GSGTGILLAVTI
KQHLTLKGHREDQKREKTLKRYIPTAAALGGILVALLSFVADFLSAFGSGTGILLAVSI
TNGWCMPGYMTKG-ALQRELNRYIPTAALAGGLILGFVGF CADIFGAI GSGTGILLAATT
TNGWCMPGYMTKG-ALQRELNRYIPTAALAGGLILGFVGF CADIFGAI GSGTGILLAATT
TNGWCMPGYMTKG-ALQRELNRYIPTAALAGGLILGFVGF CADIFGAI GSGTGILLAATT
TNGWCMPGYMTKG-ALQRELNRYIPTAALAGGLILGFVGF CADIFGAI GSGTGILLAATT

Naegleria gruberi strain NEG-M
Cryptosporidium hominis TU502
Cryptosporidium parvum Iowa II
Plasmodium falciparum 3D7
Plasmodium knowlesi strain H
Theileria annulata strain Ankara
Theileria parva strain Muguga
Leishmania infantum JPCM5
Leishmania major strain Friedlin
Trypanosoma brucei gambiense DAL972
Trypanosoma cruzi strain CL Brener
Trichomonas vaginalis G3
Giardia lamblia DH\_A2
Giardia lamblia WB\_A1
Giardia lamblia Pig\_E
Giardia lamblia GS\_B

IYQYFEMFAKQ QDELDIPFLSGQ-----
IFQYYEMFAKERESGNIVF-----
IFQYYEMFAKERESGNIVF-----
IYQFYEMLVKEQEKAASLF-----
IYQFYEMLVKEQEKAASLF-----
IYQYFEILVKEQERSGSLLYG-----
IYQYFEILVKEQERSGSLLYG-----
INQYFEILQEQEQDLYGFLKQKVA---
INQYFEILQEQEQDLYGFLKQKVA---
INQYDILREEGEDLYGNFIKRKVA---
INQYFEILQEQEQDLYGFLKQKVA---
INQFTAE LSKEMAGDGLIGILKNAAGAR
LVKMYEEFAKEGIQLSM-----
LVKMYEEFAKEGIQLSM-----
LVKMYEEFAKEGIQLSM-----
LVKMYEEFAKEGIQLSM-----

# Ribosomal Protein L14p/L23e

1 10 20 30 40 50 60

| | | | | | |

Naegleria gruberi strain NEG-M -----MASKRATGGLGNKFRISTALPTAAVMNCADNSGAKNLYVIAVNQTQGRLNRLP  
Giardia lamblia GS\_B -----MASKRGRSG-GIGNKFRISCGLPVGAVINCADNSGAKSLNMIAVKNWKGHLNRF  
Giardia lamblia WB\_A1 -----MASKRGRSG-GIGNKFRISCGLPVGAVINCADNSGAKSLNMIAVKNWKGHLNRF  
Giardia lamblia DH\_A2 -----MASKRGRSG-GIGNKFRISCGLPVGAVINCADNSGAKSLNMIAVKNWKGHLNRF  
Giardia lamblia Pig\_E -----MASKRGRSG-GIGNKFRISCGLPVGAVINCADNSGAKSLNMIAVKNWKGHLNRF  
Trichomonas vaginalis G3 -----MSKRGRG-TGQGTGFAMTAGLPVGAVINCCDNSGAKNMFIIISVRGHKGRNLRLP  
Cryptosporidium hominis TU502 -----MKRGRGA-AGGAKMRITLGLNVGALINCCDNSGGKNLYIIAVKGTGSCLNRLP  
Cryptosporidium parvum Iowa II YSLYLEKMKRGRGA-AGGAKMRITLGLNVGALINCCDNSGGKNLYIIAVKGTGSCLNRLP  
Theileria annulata strain Ankara -----MKRGRGG-SGGNKL RVTLGLPVGALINCCDNSGGKNLYIIAVKGTGACLNRLP  
Theileria parva strain Muguga -----MKRGRGG-SGGNKL RVTLGLPVGALINCCDNSGGKNLYIIAVKGTGACLNRLP  
Plasmodium falciparum 3D7 -----MKRGRAG-TLKNKMRITLSLPVGALINCCDNSGGKNLYIIAVQGFSGCLNRLP  
Plasmodium knowlesi strain H -----MKRGRAG-TLKNKMRITLSLPVGALINCCDNSGGKNLYIIAVQGFSGCLNRLP  
Leishmania infantum JPCM5 -----MGKDQAN-VKGC FRVSVLALPVGAVVNCADNTGAKNLYVISVKGYHGRLNRLP  
Leishmania major strain Friedlin -----MGKDQAN-VKGC FRVSVLALPVGAVVNCADNTGAKNLYVISVKGYHGRLNRLP  
Trypanosoma brucei gambiense DAL972 -----MGKDKAN-VKGC FRVSLALPVGAVVNCADNTGAKNLYIISVKGYHGRLNRLP  
Trypanosoma cruzi strain CL Brener -----MGKDKAN-VKGC FRVSLALPVGAVVNCADNTGAKNLYIISVKGYHGRLNRLP

Naegleria gruberi strain NEG-M AAGVGDMMATVKK-GKPELRKKVMPAVVIRQRKPWRRRDGTFFIYFEDNAGVIVNKGEM  
Giardia lamblia GS\_B KASVGDMLITVGRDGGKPELRKRVTPAVVVRQRKVVRRKDGWVIYFQDNAGVIINPKGEL  
Giardia lamblia WB\_A1 KASVGDMLITVGRDGGKPELRKRVTPAVVVRQRKVVRRKDGWVIYFQDNAGVIINPKGEL  
Giardia lamblia DH\_A2 KASVGDMLITVGRDGGKPELRKRVTPAVVVRQRKVVRRKDGWVIYFQDNAGVIINPKGEL  
Giardia lamblia Pig\_E KASVGDMLITVGRDGGKPELRKRVTPAVVVRQRKIWRRKDGWVIYFQDNAGVIINPKGEL  
Trichomonas vaginalis G3 AASVSDLIVVTCKK-GKPALRKKVSMGVVVRQRAIWRKDGVVIGFQDNAGVIINDKGEM  
Cryptosporidium hominis TU502 SASIGDMLLATVKK-GKPELRKKVWPAVIVRQRKAFRRPEGTFLYFEDNAGVIVNPKGEM  
Cryptosporidium parvum Iowa II SASIGDMLLATVKK-GKPELRKKVWPAVIVRQRKAFRRPEGTFLYFEDNAGVIVNPKGEM  
Theileria annulata strain Ankara SASVGDMLLATVKK-GRPDLRKKVLPAVIVRQRKAWRRREGYFIYFEDNAGVIVNPKGEM  
Theileria parva strain Muguga SASVGDMLLATVKK-GRPDLRKKVLPAVIVRQRKAWRRREGYFIYFEDNAGVIVNPKGEM  
Plasmodium falciparum 3D7 AASLDGMLLATVKK-GKPDRLRKKVLNAIICRQSKAWRRHEGYIYFEDNAGVIVNPKGEM  
Plasmodium knowlesi strain H AASLDGMLLATVKK-GKPDRLRKKVLNAIITRQSKAWRRHEGYFIYFEDNAGVIVNPKGEM  
Leishmania infantum JPCM5 SAALGDMVMCSVKK-GKPELRKKVLNAVIIRQRKSWRRKDGTVIYFEDNAGVIVNPKGEM  
Leishmania major strain Friedlin SAALGDMVMCSVKK-GKPELRKKVLNAVIIRQRKSWRRKDGTVIYFEDNAGVIVNPKGEM  
Trypanosoma brucei gambiense DAL972 AAALGDMVMASVKK-GKPELRKRVLNAVIIRQRKSWRRKDGTVIYFEDNAGVIVNPKGEM  
Trypanosoma cruzi strain CL Brener AAALGDIVMASVKK-GKPELRKRVLNAVIIRQRKSWRRKDGTVIYFEDNAGVIVNPKGEM

Naegleria gruberi strain NEG-M KGSVAVAGPVAKECADMWPRIASSASCVV  
Giardia lamblia GS\_B KGSSITGPVAKEAADRWPKISTTAECVH  
Giardia lamblia WB\_A1 KGSSITGPVAKEAADRWPKISTTAECVH  
Giardia lamblia DH\_A2 KGSSITGPVAKEAADRWPKISTTAECVH  
Giardia lamblia Pig\_E KGSSITGPVAKEAADRWPKISTTAECVH  
Trichomonas vaginalis G3 KGSAITGPVAKEAAELWPKVASVAPAVF  
Cryptosporidium hominis TU502 KGSAITGPVGKECAELWPKVSAAPSIV  
Cryptosporidium parvum Iowa II KGSAITGPVGKECAELWPKVSAAPSIV  
Theileria annulata strain Ankara KGSAINGPVAKECAELWPKISAAAPSIV  
Theileria parva strain Muguga KGSAINGPVAKECAELWPKISAAAPSIV  
Plasmodium falciparum 3D7 KGSAITGPVARECAELWPKLSSAASAIV  
Plasmodium knowlesi strain H KGSAITGPVARECAELWPKLSSAASAIV  
Leishmania infantum JPCM5 KGSGIAGPVAKESADLWPKISTHAPAIV  
Leishmania major strain Friedlin KGSGIAGPVAKESADLWPKISTHAPAIV  
Trypanosoma brucei gambiense DAL972 KGSGIAGPVAKESADLWPKISTHAPAIV  
Trypanosoma cruzi strain CL Brener KGSGIAGPVAKESADLWPKISSHAPAIV

# SSU Ribosomal Protein\_S2P

1 10 20 30 40 50 60

| | | | | | |

Naegleria gruberi strain NEG-M -MSLTKNAKSNILDLTPTDVQQLACECHKGTKNLETDQMKYVHGRSQKDGTHVINVAKT  
Cryptosporidium hominis TU502 -----MPPAETRKLDIAKMI VCKTHIGTKNVEDKMLS YVYKRT-HEGIFLINLAKT  
Cryptosporidium parvum Iowa II ----LYSNMPPAETRKLDIAKMI VCKTHIGTKNVEDKMLS YVYKRT-HEGIFLINLAKT  
Plasmodium falciparum 3D7 ----MS-NKKGQSPKEESI AKMLICKVHIGTKNLENKMKRYVYTRA-KDGVHIINLAKT  
Plasmodium knowlesi strain H ----MSTNKKVQSPKEESI AKMLICKVHIGTKNLENKMKRYVYTRA-KDGVHILNLAKT  
Theileria annulata strain Ankara ----MAAPTS KLTPEDSIRMM LTA KVHIGTKNVENKMRKYVYSRT-QEGVHLINLAHT  
Theileria parva strain Muguga ----MAAPTS KLTPEDSIRMM LTA KVHIGTKNVENKMRKYVYSRT-QEGVHLINLAHT  
Leishmania infantum JPCM5 --MTAVESGSKVLRMKESDAQKLLAMRCHIGTRNQSSAMKKYIYGR T-AEGSHIIDLHMM  
Leishmania major strain Friedlin --MSAVESGSKVLRMKESDAQKLLAMRCHIGTRNQSSAMKKYIYGR T-AEGSHIIDVHMM  
Trypanosoma brucei gambiense DAL972 --MTSVSSGAKVLRMKESDVQKLLAMHCHLGTKNSSSAMKKYIHGR T-SDGTNIIDIHMT  
Trypanosoma cruzi strain CL Brener --MTSVESGAKVLRMKEGDVQKLVAMHCHLGTKNRSNAMKKYIHSRT-KEGTNIIDLHMT  
Trichomonas vaginalis G3 -----MSTAAAADREAVIKMMLAAKVYLGSTNLSFGMKPYVFTCR-KDGTHTVINLAMT  
Giardia lamblia DH\_A2 MSTEKTSQASKEYQLKEADVKKMLVATTHLGV RNIDRRMQFYIFDRQ-KDGT FVFNLQKV  
Giardia lamblia WB\_A1 MSTEKTSQASKEYQLKEADVKKMLVATTHLGV RNIDRRMQFYIFDRQ-KDGT FVFNLQKV  
Giardia lamblia Pig\_E MSTEKTSQASKEYQLKEADVKKMLVATTHLGV RNIDRRMQFYIFDRQ-KDGT FVFNLQKV  
Giardia lamblia GS\_B MSTEKTSQASKEYQLKEADVKKMLVATTHLGV RNIDRRMQFYIFDRQ-KDGT FVFNLQKV

Naegleria gruberi strain NEG-M HEKLLLAARVLVTIENPKDICAISSKQYGHRAVLKFGSYTGANYLAGKFTPGTFTNQVQA  
Cryptosporidium hominis TU502 WEKIQIAARIIATIDNLDVVVVSQRPYGSRALPKFAQHTGAHAMVGRFTPGTLTNQITQ  
Cryptosporidium parvum Iowa II WEKIQIAARIIATIDNLDVVVVSQRPYGSRALPKFAQHTGAHAMVGRFTPGTLTNQITQ  
Plasmodium falciparum 3D7 YEKLQLAARIIVAINSPADVVVVSARPFGRSAVLKFAQYTGQAIAGRWTPGMLTNQIIQ  
Plasmodium knowlesi strain H YEKLQLAARIIVAINNPADVVVVSARPFGRSAVLKFAQYTGQAIAGRWTPGMLTNQIIQ  
Theileria annulata strain Ankara LEKLKVAARAI VTVSNPEE VVVVSARPYGSRAVLKFSHYVGSHP IAGR WIPGTLTNQITQ  
Theileria parva strain Muguga LEKLKVAARAI VTVSNPEE VVVVSARPYGSRAVLKFSHYVGSHP IAGR WIPGTLTNQITQ  
Leishmania infantum JPCM5 WEKLILAAARVIAAVENPKDVCVCSRLYGT RAIYKFSQHVGTSFHGGRFIPGTFTNQIQK  
Leishmania major strain Friedlin WEKLILAAARVIAAVENPKDVCVCSRLYGT RAIYKFSQHVGTSFHGGRFIPGTFTNQIQK  
Trypanosoma brucei gambiense DAL972 WEKLILAAARVIAAVENPDVTVCSTRLFGQRAIFKFSQLVGT SFLGGRFIPGTFTNQIQK  
Trypanosoma cruzi strain CL Brener WEKLILAAARVIAAVENPDVTVCSTRLFGQRAIFKFSQLVGT SFLGGRFIPGTFTNQIQK  
Trichomonas vaginalis G3 YEKIKLAARMIYAVEEPKDVLAISTKSGTRAVHKFAEFLGANYVEQRFTPGLFTNYSIK  
Giardia lamblia DH\_A2 WAKIVFAARILVTIDDPAEI AVVANRPDAQRSILKFKCYTHATAFPGRFIPGNFTNRMNP  
Giardia lamblia WB\_A1 WAKIVFAARILVTIDDPAEI AVVANRPDAQR AILKFKCYTHATAFPGRFIPGNFTNRMNP  
Giardia lamblia Pig\_E WAKIVFAARILVTIDDPAEI AVVANRPDAQR AILKFKCYTHATAFPGRFIPGNFTNRMNP  
Giardia lamblia GS\_B WAKIVFAARILVTIDDPAEI AVVANRPDAQR AILKFKCYTHATAFPGRFIPGNFTNRMNP

Naegleria gruberi strain NEG-M KFMEPRVLIVSDPRSDYQAIKEASKANIPVIAFADTDSPLKFVDIAIPVNNKNKNSIALM  
Cryptosporidium hominis TU502 KFMEPRLLIVTDP RVDSQAVIESSYANIPVIALC DTDSP LQYVDVAIPCNNKGKESIALM  
Cryptosporidium parvum Iowa II KFMEPRLLIVTDP RVDSQAVIESSYANIPVIALC DTDSP LQYVDVAIPCNNKGKESIALM  
Plasmodium falciparum 3D7 KFTEPRLLIVTDPRTDAQSVKESAYANIPVIALCSDS PLEHVDIAIPCNNKGKESIALM  
Plasmodium knowlesi strain H KFTEPRLLIVTDPRTDAQSVKESAYANIPVIALCSDS PLEHVDIAIPCNNKGKESIALM  
Theileria annulata strain Ankara KFIEPRLLVATDPRTDAQSLKESYVSLPVIALC DTDSP LNYVDIAIPCNNKGKESIALM  
Theileria parva strain Muguga KFIEPRLLVATDPRTDAQSLRESSYVSLPVIALC DTDSP LNYVDIAIPCNNKGKESIALM  
Leishmania infantum JPCM5 KFVQPRVLLVTDPRTDHQAI REASLVNIPVIALC DTDAPLEYVDIAIPCNNRGIKSIGMM  
Leishmania major strain Friedlin KFVQPRVLLVTDPRTDHQAI REASLVNIPVIALC DTDAPLEYVDIAIPCNNRGIKSIGMM  
Trypanosoma brucei gambiense DAL972 KFMQPRVLLVTDPRTDHQALREASLVNIPVIAFC DTDAPLEFVDIAIPCNNRGRHSISMM  
Trypanosoma cruzi strain CL Brener KFMQPRVLLVTDPRTDHQALREASLVNIPVIAFC DTDAPLEFVDIAIPCNNRGRYSISMM  
Trichomonas vaginalis G3 NFCEPRLMIVCDPNTDSQAVHEAAYANIPCIALC DTD AHLDYVDCVIPCNTKNKNSMGLV  
Giardia lamblia DH\_A2 NYCEPRLLLVNDPVVDRQAILEASYVNIPTISLCNS DANLKFIDVAIPCNNKTPMSIGLI  
Giardia lamblia WB\_A1 NYCEPRLLLVNDPVVDRQAILEASYVNIPTISLCNS DANLKFIDVAIPCNNKTPMSIGLI  
Giardia lamblia Pig\_E NYCEPRLLLVNDPVVDRQAILEASYVNIPTISLCNS DANLKFIDVAIPCNNKTPMSIGLI  
Giardia lamblia GS\_B NYCEPRLLLVNDPVVDRQAILEASYVNIPTISLCNS DANLKFIDVAIPCNNKTPMSIGLI

Naegleria gruberi strain NEG-M YWMLAREVLR LKGVVSRKKEWDVKPDLFLHRDLDE-----KKEEREAKESQ--ETKVQAV  
Cryptosporidium hominis TU502 YLLAREVNFLR GKTDK---WDMVDVFFWRDPEEYENSAIGADMELNDGMGVDIEGA AV  
Cryptosporidium parvum Iowa II YLLAREVNFLR GKTDK---WDMVDVFFWRDPEEYENSAIGADMELNDGMGVDIEGA AV  
Plasmodium falciparum 3D7 YWLLAQEVL YLKGVI PRSEPWNVMVDMFLWRDPEQFELKNLANEENTPTAP--HLIENQY  
Plasmodium knowlesi strain H YWLLAQEVL YLKGTL PRSKPWNVMVDMFLWRDPEQFELKNLAI EETAPAAP--HLTENQF  
Theileria annulata strain Ankara YWLLAREVLYLRDQLKRWMPWDVLDVTF FWRDPEQFEQK-PEETVNTHEED--LMASRPN  
Theileria parva strain Muguga YWLLAREVLYLRDQLKRWMPWDVLDVTF FWRDPEQFEQK-PEETVNTHEED--LLTSRPT  
Leishmania infantum JPCM5 YWLLAREVLR LRGTI VRSVPWEEKVDLFFYRDPN-----EAAEKA-----AAAAAA  
Leishmania major strain Friedlin YWLLAREVLR LRGTI VRSVPWEEKVDLFFYRDPN-----EAAEKA-----AAAAAA  
Trypanosoma brucei gambiense DAL972 YWLLAREVLR LRGTI PRSVPWEVKVDLFFYRDP E-----EALKQEE-----ATAAAE  
Trypanosoma cruzi strain CL Brener YWLLAREVLR LRGTI PRSVPWDVKVDLFFYRDP E-----EALKHEE-----VNQAAA  
Trichomonas vaginalis G3 MWLLTREVLR LRGALTRTQEWVLPDLFFYRDAAD--EAKIAEAL EAGEETVSEEGAI I  
Giardia lamblia DH\_A2 YWLLAREVLR LKGSISRTEEWDVKPDLFVALPEEIP-----DEEESD-----FYD  
Giardia lamblia WB\_A1 YWLLAREVLR LKGSISRTEEWDVKPDLFVALPEEIP-----DEEESD-----FYD  
Giardia lamblia Pig\_E YWLLAREVLR LKGSISRTEEWDVKPDLFVALPEEIP-----DEEESD-----FYD  
Giardia lamblia GS\_B YWLLAREVLR LKGSILRTEEWDVKPDLFVALPEEIP-----AEEESD-----FYD

Naegleria gruberi strain NEG-M VAAETTEEAEEYE--GEGGQTAEWGMDQ-----  
Cryptosporidium hominis TU502 DSAAAAANEWGGVSGNWGGSAAD EWRNAP-----  
Cryptosporidium parvum Iowa II DSAAAAANEWGGVSGNWGGSAAD EWRNAP-----  
Plasmodium falciparum 3D7 AA EAPYDEWTKKE-EWNDNTNEDWKNPIA-AEEW-----  
Plasmodium knowlesi strain H ATEAPYEEWKNKE-EWNDNANE EWNPIA-AEEW-----  
Theileria annulata strain Ankara VPLHPLPDWSTVD-PSHANS-SDWKVMAAGHEEWG SFVDTRAQWQ  
Theileria parva strain Muguga VPLHPLPDWSTVD-PAHANS-SDWKVMAAGHEEWG SFVDTRAQWQ  
Leishmania infantum JPCM5 PAAEAEEGFGWVE----RNDN AWEA-----  
Leishmania major strain Friedlin PAAEAEEGFGWVE----RNDN AWEA-----  
Trypanosoma brucei gambiense DAL972 VHEEADEGYGWVE----RDN--TWEQ-----  
Trypanosoma cruzi strain CL Brener PVAEVDEGFGWVE----RDNN-AWEQ-----  
Trichomonas vaginalis G3 NAAVPKAEIKAGATNEEWENKQEWDA-----  
Giardia lamblia DH\_A2 DDEEEDEEF SAGN----GNLFDEY-----  
Giardia lamblia WB\_A1 DDEEEDEEF SAGN----GNLFDEY-----  
Giardia lamblia Pig\_E DDEEEDEEF SAGN----GNLFDEY-----  
Giardia lamblia GS\_B DDDEEDEFSTGN----GNLFDE-----

## SSU Ribosomal Protein S15

1 10 20 30 40 50 60

| | | | | | |  
-----MAMENDELKNLFTSALRRRIGK-G  
-----MADTEQKKRTFRTYSYRGVLDKLLTMKLDEVVELLPARKRRKIARGC  
-----TSTREKKMADTEQKKRTFRTYSYRGVLDKLLTMKLDEVVELLPARKRRKIARGC  
----MASNITAERYEQLKKERTFHKFTYRGGLEIDPLLALSEEEFRALVHARARRNMNRH-  
----MASNITAERYEQLKKERTFHKFTYRGGLEIDPLLALSEEEFKALVHARARRNMNRH-  
----MASNITQERYDQLKKERTFHKFTYRGGLEIDPLLALTEEEFKALVHARARRRMNRH-  
----MTSNITQERYEQLKKERTFHKFTYRGGLEIDPLLALSEEEFKTLVHARARRHMNRH-  
-----MEDANKPKK-RTFRTFQYRGVLDKLLDLSQDELIKL FKARQRRKFQRG-  
-----MEDANKPKK-RTFRTFHRYRGVELDKLLDLSQEELVKLFRARQRRKFKRG-  
-----MDGANRDDRILKK-RTFRTFKYRGYELEKLLLEMPIEKLELLPARQRRRFSRG-  
-----MVEEQGVQILKK-RTFRTFKYRGYELEKLLLEMPIDKLELLPARQRRRFSRG-  
-----MADQVKTRRRGLAQPFRGVEVEKLATMKITDILPKLNARCRRRIGKHG  
-----MTDQVKTRRRGLAQPFRGVEVEKLATMKITDILPKLNARCRRRIGKHG  
-----MADQVKTRRRGLVQPNFRGVEVEKLATMKITDILPKLNARCRRRIGKHG  
MDSYISFLEGTADQTKTRRRGLAQPFRGVEVEKLVTKITDILPKLNARCRRRIGKHG  
-----MSASGKFAQRNYTYRGKTLDDL RAMELKDFVELLPTKRRRFISRS-

ISKKYKTLIEKAQKKRD--TAPYGEKPDVAVKTHLRDMIILPSMIGCVIGVYQGKDYVSVE  
LNRRTAAFIAKLRKSKA--ECPMGEKPVAVRTHLRNMVILPEMVGSVAGVYNGKTYVTVE  
LNRRTAAFIAKLRKSKA--ECPMGEKPVAVRTHLRNMVILPEMVGSVAGVYNGKTYVTVE  
VDRRPPVLLKRLREAKK--HVKVGEKPKAVKTHLRDVVITPEMVGSVVAIYNGHQFNAVE  
ADRRPPVLLKRLREAKK--HVKVGEKPKAVKTHLRDVVITPEMVGSVVAIYNGHQFNAVE  
ADRRAPVLLKRLREAKK--NVKAGEKPKAVKTHLRDVVITPEMVGSVVGIYNGRQFNAVE  
ANRRAPVLLKRLREAKK--DVKAGEKPRAVKTHLRDVVITPEMVGSVVGIYNGRQFNAVE  
ISKKAKSLLKKIRKSKK--NCEPGEKPNPVPHLRNMTIIPEMVGSIVAVHNGKQYTNVE  
ISKKEKSLLKLRKAKK--ECEVGEKPRAIPTHLRNMTIIPEMVGSIVAVHNGKQYNNVE  
VKRQSLTLLNKLRAAKK--DLPYGQKPEPVKTHLRNMVVIPEMIGSIVGVHNGKQYINVE  
VKRQSLTLLKLRRAAKK--DLPYGQKPEPVKTHLRNMVVIPEMIGSIVGVHNGKQYINVE  
LSMKHLRFVNKLRLRRA--AQPS-QKPKIVRTHLRDMIIFPEMIGMTVSVYNGRQFIPVE  
LSMKHLRFVNKLRLRRA--AQPS-QKPKIVRTHLRDMIIFPEMIGMTVSVYNGRQFIPVE  
LSMKHLRFVNKLRLRRT--AQPS-QKPKIVRTHLRDMIIFPEMIGMTVSVYNGRQFIPVE  
LSMKHLRFVNKLRLRRA--AQPS-QKPKIVRTHLRDMIIFPEMIGMTVSVYNGRQFIPVE  
FDLKHVHLIEKLLKARQAVEGQAGVRPPVVKTHLRHVMVILPEFVDNVIGIYDGHVFFEVQ

IKPEMVGMLSDFSITYKPVKHKPGIGATSSSKFVPLK  
IKPEMIGMYLGEFSITYKPVHKGPGVGSTSSSRFIPLK  
IKPEMIGMYLGEFSITYKPVHKGPGVGSTSSSRFIPLK  
IKGEMIGHYLGEFSMSYRPVLHGRPGVATHSSRFIPIK  
IKGEMIGHYLGEFSMSYRPVLHGRPGVATHSSRFIPIK  
IKGEMIGHYLGEFSITYKPVHGRPGVATHSSRFIPLK  
IKGEMIGHYLGEFSITYKPVHGRPGVATHSSRFIPLK  
IKPEMIGYYLGEFSITYKPTRHKGPGIGATHSSRFIPLK  
IKPEMIGYYLGEFSITYKPTRHKGPGIGATHSSRFIPLK  
IKPEMIGYYLGEFSITYKPVHKGPGIGATHSSRFIPLK  
IKPEMIGYYLGEFSITYKPVHKGPGIGATHSSRFIPLK  
IKPPMVGRALREYSMSYKIVSHGKVGIGATRSSKFVPLR  
IKPPMVGRALREYSMSYKIVSHGKVGIGATRSSKFVPLR  
IKPPMVGRALREYSMSYKIVSHGKVGIGATRSSKFVPLR  
IKPPMVGRALREYSMSYKIVSHGKVGIGATRSSKFVPLR  
IKPEMIGHVLADFAPSKKVVKHSKAGVGATRSSSATS

Naegleria gruberi strain NEG-M  
Cryptosporidium hominis TU502  
Cryptosporidium parvum Iowa II  
Leishmania infantum JPCM5  
Leishmania major strain Friedlin  
Trypanosoma brucei gambiense DAL972  
Trypanosoma cruzi strain CL Brener  
Plasmodium falciparum 3D7  
Plasmodium knowlesi strain H  
Theileria annulata strain Ankara  
Theileria parva strain Muguga  
Giardia lamblia DH\_A2  
Giardia lamblia WB\_A1  
Giardia lamblia Pig\_E  
Giardia lamblia GS\_B  
Trichomonas vaginalis G3

Naegleria gruberi strain NEG-M  
Cryptosporidium hominis TU502  
Cryptosporidium parvum Iowa II  
Leishmania infantum JPCM5  
Leishmania major strain Friedlin  
Trypanosoma brucei gambiense DAL972  
Trypanosoma cruzi strain CL Brener  
Plasmodium falciparum 3D7  
Plasmodium knowlesi strain H  
Theileria annulata strain Ankara  
Theileria parva strain Muguga  
Giardia lamblia DH\_A2  
Giardia lamblia WB\_A1  
Giardia lamblia Pig\_E  
Giardia lamblia GS\_B  
Trichomonas vaginalis G3

Naegleria gruberi strain NEG-M  
Cryptosporidium hominis TU502  
Cryptosporidium parvum Iowa II  
Leishmania infantum JPCM5  
Leishmania major strain Friedlin  
Trypanosoma brucei gambiense DAL972  
Trypanosoma cruzi strain CL Brener  
Plasmodium falciparum 3D7  
Plasmodium knowlesi strain H  
Theileria annulata strain Ankara  
Theileria parva strain Muguga  
Giardia lamblia DH\_A2  
Giardia lamblia WB\_A1  
Giardia lamblia Pig\_E  
Giardia lamblia GS\_B  
Trichomonas vaginalis G3



# SSU Ribosomal Protein S15P

1 10 20 30 40 50 60

| | | | | | |

Naegleria gruberi strain NEG-M ---MGRMHGAGNGKSQSVIPYRRSPPTWLKVTAEEVEDKIVKLARKGYTPSQIGAILRDS  
Cryptosporidium hominis TU502 ---MGRVYGRGKGISSSAKPYRRRPPTWIKLKPSEAEDLITKLARKGLTPSQIGVTLRDS  
Cryptosporidium parvum Iowa II RGKMGRVYGRGKGISSSAKPYRRRPPTWIKLKPSEAEDLITKLARKGLTPSQIGVTLRDS  
Plasmodium falciparum 3D7 ---MGRMYGKGGKGISSSTLPYKRKQPSWLKQKPSEIEDAIIKLAKKGQTPSQIGATLRDN  
Plasmodium knowlesi strain H ---MGRMYGKGGKGISSSTIPYKRKQPSWLKQKPSEIEDAIIKLAKKGQTPSQIGATLRDN  
Theileria annulata strain Ankara ---MGRMYGKGGKGISSSSIPYGRKPPSWLKT KPFEVEEQIAKLAKKGQTPSQIGVSLRDS  
Theileria parva strain Muguga ---MGRMYGKGGKGISSSSIPYGRKPPSWLKT KPFEVEEQIAKLAKKGQTPSQIGVSLRDS  
Trichomonas vaginalis G3 ---MGRLHSQGGKGISSSTCFRRSAPHWLQLTAEKCVQMICDYAKKGVRPSQIGALLRDR  
Giardia lamblia DH\_A2 ---MGRMHKGGKGISRSaipYTRAPAPWnkYTPEDVCEQICKLAKKGTPPSRIGLILRDQ  
Giardia lamblia WB\_A1 ---MGRMHKGGKGISRSaipYTRAPAPWnkYTPEDVCEQICKLAKKGTPPSRIGLILRDQ  
Giardia lamblia GS\_B ---MGRMHKGGKGISRSaipYTRAPAPWnkYTAEDVCEQICKLARKGTPPSRIGLILRDQ  
Giardia lamblia Pig\_E ---MGRMHKGGKGISRSaipYTRAPAPWnkYTPEDVCEQICKLARKGTPPSRIGLILRDQ  
Leishmania infantum JPCM5 ---MVRMHGNGRGKASSALPYRRTPPAWLKIASRNvVkmVCKSSRKGMMPSQIGMELRDS  
Leishmania major strain Friedlin ---MVRMHGNGRGKASSALPYRRTPPAWLKIASRNvVkmVCKSSRKGMMPSQIGMELRDS  
Trypanosoma brucei gambiense DAL972 ---MVRMHGNGHGKAASALPYRRTPPPTWLKSSSRDVIDAVCKLAKKGLSPSRIGMQLRDS  
Trypanosoma cruzi strain CL Brener ---MVRMQGVGHGKSASSLPFCRTPPSWLKIASRDVIDAVCKLAKKGLTPSRIGMQLRDS

Naegleria gruberi strain NEG-M DGIGRVKSVTGKKILRMLKSNGLAPEIPEDLYQLIKKAVGIRKHLEKTRKDRKAKYQLIL  
Cryptosporidium hominis TU502 HGIPMVQSLTGSKILRILKKNGLAPDIPEDLYFLIKRAVSIRKHLEKFRKDTAAKYRLIL  
Cryptosporidium parvum Iowa II HGIPMVQSLTGSKILRILKKNGLAPDIPEDLYFLIKRAVSIRKHLEKFRKDTAAKYRLIL  
Plasmodium falciparum 3D7 YGIPQVKSVTGNKILRILRAQGIATTIPEDLYFLIKKAVSMRKHLEKNKKDKDKCKFRLIL  
Plasmodium knowlesi strain H YGIPQVKAVTGNKILRILRAHGVAATTIPEDLYFLIKKAVSMRKHLEKNKKDKDKCKFRLIL  
Theileria annulata strain Ankara MAIPQVKAVTNNKILRILKAQGLAPEIPEDLYFLIKKAVSMRKHMEQNLNDKDSKFRILIL  
Theileria parva strain Muguga MAIPQVKAVTNNKILRILKAQGLAPEIPEDLYFLIKKAVSMRKHMEHNLNDKDSKFRILIL  
Trichomonas vaginalis G3 NGVGMVRAVTGVKVLRIKANGLAPALPEELYHLIKKATNVRKHLEHAKHDVDSKYRLIL  
Giardia lamblia DH\_A2 FAIGQVKNVTGSKIVRILKAKGLAPEIPEDLYCMIKKAVAIRKHLERSRRDKDSKFRILIL  
Giardia lamblia WB\_A1 FAIGQVKNVTGSKIVRILKAKGLAPEIPEDLYCMIKKAVAIRKHLERSRRDKDSKFRILIL  
Giardia lamblia GS\_B FAIGQVKNITGSKIVRILKAKGLAPEIPEDLYCMIKKAVAIRKHLERSRRDKDSKFRILIL  
Giardia lamblia Pig\_E FAIGQVKNVTGSKIVRILKAKGLAPEIPEDLYCMIKKAVAIRKHLERSRRDKDSKFRILIL  
Leishmania infantum JPCM5 MGIAQVKNVTGRKILRILKHSLAPEIPEDLYFLVVKRATQMRKHLERHTTDRDTKYRLIL  
Leishmania major strain Friedlin MGIAQVKNVTGRKILRILKHNGLAPEIPEDLYFLVVKRATQMRKHLERHTTDRDTKYRLIL  
Trypanosoma brucei gambiense DAL972 MGIAQVKNVTGRKILRILKHKGMAPEIPEDLYCLIKRATQMRKHLERNTKDKDTKFRILIL  
Trypanosoma cruzi strain CL Brener MGIAQVKNVTGRKILRILKHKGMAPEIPEDLYCLIKRATEMRKHLERNTKDRDTKFRILIL

Naegleria gruberi strain NEG-M CESKVHRLSRYKSTKVLAPNWKYESATAEALINA--  
Cryptosporidium hominis TU502 VESRIHRLARYFKRSKQLPANWKYQAATASTLVA---  
Cryptosporidium parvum Iowa II VESRIHRLARYFKRSKQLPANWKYQAATASTLVA---  
Plasmodium falciparum 3D7 TESKIHRISRYKRRKLLPSNWKYQSSTASALIA---  
Plasmodium knowlesi strain H TESKIHRISRYKRRKLLPSNWKYQSSTASALIA---  
Theileria annulata strain Ankara VESRIHRLARYYKKRQLPATWKYQASTAGTLVA---  
Theileria parva strain Muguga VESRIHRLARYYKKRQLPATWKYQASTAGTLVA---  
Trichomonas vaginalis G3 IESRIHRLTRYKTRRVLAPNWKYNAQTASALVA---  
Giardia lamblia DH\_A2 VESRIHRLARYRQARRLPPTFRYKSDQAAALLATYA  
Giardia lamblia WB\_A1 VESRIHRLARYRQARRLPPTFRYKSDQAAALLATYA  
Giardia lamblia GS\_B VESRIHRLARYRQARRLPPTFRYKSDQAAALLATYA  
Giardia lamblia Pig\_E VESRIHRLARYRQARRLPPTFRYKSDQAAALLATYA  
Leishmania infantum JPCM5 VESRIHRLARYYKRVKQLPPTWKYESSTASAMVA---  
Leishmania major strain Friedlin VESRIHRLARYYKRVKQLPPTWKYESSTASAMVA---  
Trypanosoma brucei gambiense DAL972 VESRIHRLARYYRRVKQLPPTWKYESSTASAMVA---  
Trypanosoma cruzi strain CL Brener VESRIHRLARYYKRVKQLPPTWKYESSTASAMVA---

S-Adenosylmethionine Synthetase

1 10 20 30 40 50 60
| | | | | |
-----MSLSLPPSS-----ESFVKTILFSSESVTEGHPDKLCDQVSDAVLDAACL
-----MDSRRLSGNKSTYTDLQTTSEQFLFSSESVCSGHPDKLCDQISDAILDACL
-----MDSRRFSGNKSTYTDLQTTSEQFLFSSESVCSGHPDKLCDQISDAILDACL
-----MS-----VHSILFSSEHVTGHPDKLCDQVSDAVLDAACL
-----MS-----VHSILFSSEHVTGHPDKLCDQVSDAVLDAACL
-----MS-----VRQIFFTSEHVSEGHDPDKLCDQISDAILDACL
-----MS-----VRQILFSSEHVSEGHDPDKLCDQVSDAVLDAACL
-----MSQLKIK-----RGNFLFTSESVNEGHPDKICDQISDAILDACL
-----MNHLLKIK-----RGNFLFTSESVNEGHPDKVCDQISDAILDACL
-----MAVPNFINHT-----NGTFLFTSESVNEGHPDKLCDQISDSILDACL
-----MPLPKFINNT-----NGSFLFTSESVNEGHPDKLCDQISDSILDACL
-----MS-----QHLLFTSESVTEGHPDKMCDIISDTILDACL
-----MQIKMS-----PRTFLFTSEQVSEGHDPDKICDQISDRILDITL
-----MQIKMS-----PRTFLFTSEQVSEGHDPDKICDQISDRILDITL
-----MS-----PRTFLFTSEQVSEGHDPDKICDQISDRILDITL
VVPIKCKIKMT-----PRTFLFTSEQVSEGHDPDKICDQISDRILDITL

Naegleria gruberi strain NEG-M AVDPMSKIVACESCKTKGMVLFGEITSKANIDFQKIVRETVEKEIGFDDSSKGFDFYKTCNV
Cryptosporidium hominis TU502 EQDPESFVACETCTKTGFMVFEITTKANVNVERVVRETVEKEIGYDSEEKGLDYKTMVDV
Cryptosporidium parvum Iowa II EQDPESFVACETCTKTGFMVFEITTKANVNVERVVRETVEKEIGYDSEEKGLDYKTMVDV
Leishmania infantum JPCM5 AGDPFSKVACESCAKTKGMVMVFEITTKAVLDYQKIVRNTIKDIGFDSADKGLDYESC NV
Leishmania major strain Friedlin AGDPFSKVACESCAKTKGMVMVFEITTKAVLDYQKIVRNTIKDIGFDSADKGLDYESC NV
Trypanosoma brucei gambiense DAL972 EQDPLSKVACETCSKTGMVLFGEITTKAVLDYQKIVRNTIKDIGFDSADKGLDYESC NV
Trypanosoma cruzi strain CL Brener ASDPLSRVACETCSKTGMIMIFGEITTKAVLDYQKIVRNTIKDIGFDDGEGKGLDYRSCNL
Plasmodium falciparum 3D7 REDPYSKVACEVCAKNKIYIFIFGEITTKAVLDYQKIVRNTIKDIGYDDESKGLDYKTAEI
Plasmodium knowlesi strain H REDPEKVAECEVCAKNKIYIFIFGEITTKAVLDYQKIVRNTIKDIGYDDESKGLDYKTAEI
Theileria annulata strain Ankara EQDKESKVACEVCTTKDFVMVFEITTKAVLDYQKIVRNTIKDIGYDDESKGLDYKTAEI
Theileria parva strain Muguga EQDKDKSVKACEVCATKDFIMVFEISTFANVDYVEVVKSLKNVGYTSTALGIDSDDTVEV
Trichomonas vaginalis G3 AQDPLSKVACETCTKTGIVCLLGEITSNALHDYQKIVRNTIKDIGYDDESKGLDYKTAEI
Giardia lamblia DH\_A2 AQDKIARVAADVAIKDNTVFLLEGEISTTAVVDYNQIVRDLREIGYEDEKTSDDWRTVEI
Giardia lamblia WB\_A1 AQDKIARVAADVAIKDNTVFLLEGEISTTAVVDYNQIVRDLREIGYEDEKTSDDWRTVEI
Giardia lamblia Pig\_E AQDKIARVAADVAIKDNTVFLLEGEISTTAVVDYNQIVRDLREIGYEDEKTSDDWRTVEI
Giardia lamblia GS\_B AQDKVARVAADVAIKDNTVFLLEGEISTTAVVDYNQIVRDLREIGYEDAETSDDWRTVEI

Naegleria gruberi strain NEG-M LVAVEQQSPDISQCVMKDLGLENLGGAGDQGMFGYACNETSEMLPLSHLLASQLAKLKTQ
Cryptosporidium hominis TU502 IIKLEEQSNQIAGCVHVDKNVEDIGAGDQGMFGYATNETKELMPLTHVLATSITRELDY
Cryptosporidium parvum Iowa II IIKLEEQSNQIAGCVHVDKNVEDIGAGDQGMFGYATNETKELMPLTHVLATSITRELDY
Leishmania infantum JPCM5 LVAIEQQSPDI CQGLG--NFDSEDLGAGDQGMFGYATDETTLMPLTYELARGLAKKYSE
Leishmania major strain Friedlin LVAIEQQSPDI CQGLG--NFDSEDLGAGDQGMFGYATDETTLMPLTYELARGLAKKYSE
Trypanosoma brucei gambiense DAL972 LVAIEQQSPDIYQGLG--DFGGENLGGAGDQGMFGYATNETLMPLSYELARGLAMTYSE
Trypanosoma cruzi strain CL Brener LVAIEHQSPDIYQGLG--DFGGEGLGAGDQGMFGYATDETTLMPLTYELARGLAKKYSE
Plasmodium falciparum 3D7 KVSIDEQSPDIAQCCHENRSPELIGAGDQGMFGYATDETTLMPLTHYATLLGKRLTE
Plasmodium knowlesi strain H KIYIDEQSPDIAQCCHENRSPELIGAGDQGMFGYATDETTLMPLTHYATLLGKRLTE
Theileria annulata strain Ankara LVKFNLSQPEIANAVHVGKAKEQIGAGDQGMFGYATDETTPECVPLSHSLAVKLGQRLSY
Theileria parva strain Muguga LVKFLKLSQPEIANAVHVGKAKEHIGAGDQGMFGYATDETTPECVPLSHSLAVKLGQRLSY
Trichomonas vaginalis G3 MVSYSQSQSADIAQAHLNKAEEELGAGDQGMFGYATDETTKELFPLTHVLAHNLRKLTTE
Giardia lamblia DH\_A2 INRISSQSPDIYQAVF---RQDELCAQDQGMIGYASQETKALMPATHLFANLLAMRLSR
Giardia lamblia WB\_A1 INRISSQSPDIYQAVF---RQDELCAQDQGMIGYASQETKALMPATHLFANLLAMRLSR
Giardia lamblia Pig\_E INHISSQSPDIYQAVF---RQDELCAQDQGMIGYASQETKALMPATHLFANLLAMRLSR
Giardia lamblia GS\_B INRISNQSPDIYQAVF---RQDELCAQDQGMIGYASQETKALMPATHLFANLLAMRLTR

Naegleria gruberi strain NEG-M VRKSGE---LKWLRPDGKTQVTVEYKHSNGE---MIPKRVTITVLSQHDVSVTNDQIK
Cryptosporidium hominis TU502 IRMKGVSSRVGWL RPDGKAQVTVEYN--CKHG--VLIPKRITHTILVSVQHDIENEEIR
Cryptosporidium parvum Iowa II IRVKGVSSRVGWL RPDGKAQVTVEYN--CKHG--VLIPKRITHTILVSVQHDIENEEIR
Leishmania infantum JPCM5 LRRDGS---LEWARPDAKTQVTVEYDYDTREGKQVLT PKRVAVVLISAQHDHVTNDKIS
Leishmania major strain Friedlin LRRVGS---LEWARPDAKTQVTVEYDYDTREGKQVLT PKRVAVVLISAQHDHVTNDKIS
Trypanosoma brucei gambiense DAL972 LRRNGG---LPWARPDAKTQVTVEYDYDTREGKQVLT PKRVAVVLISAQHDHVTNDKIS
Trypanosoma cruzi strain CL Brener LRRNGT---LPWARPDAKTQVTVEYDYDTREGKQVLT PKRVAVVLISAQHDHVTNDKIS
Plasmodium falciparum 3D7 VRKLGII---LPYLGPDGKTQITIEYKNKGSCG--GHLEPLRVHTVLISTQHAEDIKYEQLK
Plasmodium knowlesi strain H VRKLGII---LPYLGPDGKTQITIEYKNKGSCG--GHLEPLRVHTVLISTQHSENIKYEQLK
Theileria annulata strain Ankara VRKNGY---LPYLRPDGKTQVTVEYRKYTN---GYIEPKRVDTIIVISSQHDPGVDFQVMK
Theileria parva strain Muguga VRKNSN---LSYLRPDGKTQVTVEYKHTN---GHIEPKRVDTIIVISTQHDPGVDFGVMK
Trichomonas vaginalis G3 VRKNGT---LPFLGPDGKTQVTVEYERTDG---HLKPLRITHTVLISTMHTDDVTLEKLR
Giardia lamblia DH\_A2 VRKTGV---LPFLRPDSKTQVTIKYEEDPLTK--ELRPIFLDTL IISTMHAEI GNTALR
Giardia lamblia WB\_A1 VRKTGV---LPFLRPDSKTQVTIKYEEDPLTK--ELRPIFLDTL IISTMHAEI GNTALR
Giardia lamblia Pig\_E VRKTGV---LPFLRPDSKTQVTIKYEEDPLTK--ELRPIFLDTL IISTMHAEI GNTALR
Giardia lamblia GS\_B VRKMGII---LTLRPDSKTQVTIKYEEDPLTK--ELRPVFLDTL IISTMHTTEVDNTTLR

Naegleria gruberi strain NEG-M TDIKKHVIQKVIPEKYLDS-----
Cryptosporidium hominis TU502 EFVLENVIKKVCPSDLMDK-----
Cryptosporidium parvum Iowa II EFVLENVIKKVCPSDLMDK-----
Leishmania infantum JPCM5 VDLMEKVIKAVIPANMLDA-----
Leishmania major strain Friedlin VDLMEKVIKAVIPANMLDA-----
Trypanosoma brucei gambiense DAL972 EDLVKKVINTTIPAKFLDE-----
Trypanosoma cruzi strain CL Brener KDLMEKVIKAVIPAHMLDA-----
Plasmodium falciparum 3D7 TDLMENVIKYVIPEKLLDN-----
Plasmodium knowlesi strain H SDLIENVVKYVIPEKMLDE-----
Theileria annulata strain Ankara EDIMKDVIMQVVPKHLLDE-----
Theileria parva strain Muguga EDIMKHVVMQVVPKLLLDE-----
Trichomonas vaginalis G3 VAVKEHVIDAVLPEKLVDD-----
Giardia lamblia DH\_A2 TAIFKHVVIPTLKQLKEDEGLSLQVLLPGCEDGNLERFDYASWPIEDICRGHYNCKGSDQ
Giardia lamblia WB\_A1 TAIFKHVVIPTLKQLKEDEGLSLQVLLPGCEDGNLERFDYASWPIEDICRGHYNCKGSDQ
Giardia lamblia Pig\_E TAIFKHVVIPTLKQLKEDEGLSLQILLPGCEDGNPEMFDYANWPIEDICRGYKCGGNDQ
Giardia lamblia GS\_B TAVFKHVVIPTLKQLKEDEGLNLQVLLPGCEDGNLEAFDYANWPIEDICRGHYGKCGADQ

Naegleria gruberi strain NEG-M --ETIYHINPSGRFVIGGPGDAGLTGRKIIIVDTYGGWGAHGGGAFSGKDPTKVDRSASY
Cryptosporidium hominis TU502 --ETRILINPSGRFTIGGPAADAGLTGRKIIIVDTYGGWGAHGGGAFSGKDPTKVDRSGAY
Cryptosporidium parvum Iowa II --ETRILINPSGRFTIGGPAADAGLTGRKIIIVDTYGGWGAHGGGAFSGKDPTKVDRSGAY
Leishmania infantum JPCM5 --ETKYWLNPSGRFVRGGPHGDAGLTGRKIIIVDTYGGWGAHGGGAFSGKDPSKVDRSAAY
Leishmania major strain Friedlin --ETKYCLNPSGRFVRGGPHGDAGLTGRKIIIVDTYGGWGAHGGGAFSGKDPSKVDRSAAY
Trypanosoma brucei gambiense DAL972 --NTKYHLNPSGRFVIGGPGDAGLTGRKIIIVDTYGGWGAHGGGAFSGKDPSKVDRSAAY
Trypanosoma cruzi strain CL Brener --DTKYHLNPSGRFVIGGPHGDAGLTGRKIIIVDTYGGWGAHGGGAFSGKDPSKVDRSAAY
Plasmodium falciparum 3D7 --ETLYYLNPSGK FVLGGPAADAGLTGRKIIICD TYGGWGAHGGGAFSGKDASKVDRSAAY
Plasmodium knowlesi strain H --ETLYYLNPSGK FVLGGPAADAGLTGRKIIICD TYGGWGAHGGGAFSGKDPSKVDRSAAY
Theileria annulata strain Ankara --KTKYLINPAGSFVLGGPASDSGLTGRKVIIVDTYGGWGAHGGGAFSGKDSTKVDRSGAY
Theileria parva strain Muguga --RTKYLINPAGSFVLGGPASDAGLTGRKVIIVDTYGGWGAHGGGAFSGKDSTKVDRSGAY
Trichomonas vaginalis G3 --KTILHINPGRFVIGGPLGDSGLTGRKIIIVDSYGGWGAHGGGAFSGKDPSKVDRSACY
Giardia lamblia DH\_A2 PQYTKLLINPSDRFVIGGPKSDCGLTGRKVIADSYGSFGSHGGGAFSGKDASKVDRSGAY
Giardia lamblia WB\_A1 PQYTKLLINPSDRFVIGGPKSDCGLTGRKVIADSYGSFGSHGGGAFSGKDASKVDRSGAY
Giardia lamblia Pig\_E PQYTKLLINPSDRFVIGGPKSDCGLTGRKVIADSYGSFGSHGGGAFSGKDASKVDRSGAY
Giardia lamblia GS\_B PQYTKLLINPSDRFVIGGPKSDCGLTGRKVIADSYGSFGSHGGGAFSGKDASKVDRSGAY

Naegleria gruberi strain NEG-M YSRVAKNIVA--AGLAKRCLIQVSYAIGICEPLSVHVFTEG--TAQNGLDLDDWKILD--IVK
Cryptosporidium hominis TU502 MARLVAKSIVF--SGLCSRCLVQVSYGIGIARPLSLYINTFG--TAKDGYNDTKLLE--IVN
Cryptosporidium parvum Iowa II MARLVAKSIVF--SGLCSRCLVQVSYGIGIARPLSLYINTFG--TAKDGYNDTKLLE--IVN
Leishmania infantum JPCM5 AARWIAKSIVA--GGLARRCLVQLAYAIGVAEPLSMHVETYG--TGKY--DDAKLLE--IVK
Leishmania major strain Friedlin AARWIAKSIVA--GGLARRCLVQLAYAIGVAEPLSMHVETYG--TGKY--DDAKLLE--IVK
Trypanosoma brucei gambiense DAL972 AARWIAKSLVA--AGLADRCLVQLSYAIGVAEPLNIHVDTY--TGKR--DDEYILG--IVQ
Trypanosoma cruzi strain CL Brener AARWIAKSLVA--GGLARRCLVQLAYAIGVAEPLNIHIETY--TGKY--DDGRILE--IVT
Plasmodium falciparum 3D7 YLRFIAKSLVA--NKFRRRLVQASYSIGIANPISLNVNSYG--TVSTGYTDYDLEQ--IIL
Plasmodium knowlesi strain H YLRYIAKSLVA--NKFRRRLVQASYSIGIANPISLNVNSYG--TASTGYTDYDLEQ--IIL
Theileria annulata strain Ankara YARFVAKSLVS--NGFCKRVIVQISYICIGTVDPISLYIDTYG--TVAKGYTDNDLRE--IVL
Theileria parva strain Muguga YARFVAKSLVL--NGFCKRVLVQISYICIGAVDPISLYIDTYG--TVAKGYTDNDLQK--IVL
Trichomonas vaginalis G3 AARWVAKSLVA--AGLCSRCLVQLSYAIGVAHPLSVFVDTY--TGKGY--TDEELVE--IIN
Giardia lamblia DH\_A2 LARNIAMSLSLSPMNNICKRCMVQIGYAI GVAEPVSI FVEMYGSELKPEYADQQLIERAIR
Giardia lamblia WB\_A1 LARNIAMSLSLSPMNNICKRCMVQIGYAI GVAEPVSI FVEMYGSELKPEYADQQLIERAIR
Giardia lamblia Pig\_E LARNIAMSLSLSPMNNICKRCMVQIGYAI GVAEPVSI FVEMYGSELKPEYADQQLIERAIR
Giardia lamblia GS\_B LARNIAMSLSLSPMNNVCKRCMVQLGYAIGVAEPVSI FVEMYGSELKPEYADQQLIEKAIR

Naegleria gruberi strain NEG-M KNFNFTPYNMIKELNLRPIYSKTSAYGHFGRSE-----FPWEQIKPLKLD-----
Cryptosporidium hominis TU502 KVFDLFRPGILIKQLNLSPIFKKTS SGGHFGFRSEKE----FLWEKPIILQ-----
Cryptosporidium parvum Iowa II KVFDLFRPGILIKQLNLSPIFKKTS SGGHFGFRSEEE----FLWEKPIILQ-----
Leishmania infantum JPCM5 QNFKLRPYDIIQELNLRPIY YETSRFGHFGRKDELGTGGFTWEV PPKMVE-----
Leishmania major strain Friedlin QNFKLRPYDIIQELNLRPIY YETSRFGHFGRKDESGTGGFTWEV PPKMVE-----
Trypanosoma brucei gambiense DAL972 KNFRLRPYDIIKELDLRPIYRQ TACFGHFGRVDTNGKGGFTWEV PPKLLEGLSDVQ----
Trypanosoma cruzi strain CL Brener KNFRLRPYDIIKELDLRPIYRQ TACFGHFGRVDTNGKGGFTWEV PPKLLEGLSDVQ----
Plasmodium falciparum 3D7 RNFDLRPGFIIQELKLT ETPVFSKTSAYGHFGREGD T----FTWEKIKDLSHEK-----NA
Plasmodium knowlesi strain H RNFDLRPGFII EELKLEKPIFNTSAYGHFGRESDNS----FTWEKIKDLTHEK-----NV
Theileria annulata strain Ankara RNFDFRVGYIIEDELKLRPI FFKTSVYGHFGREDSD----FLWERPKDLSHEKLSNNHNY
Theileria parva strain Muguga KNFDFRVGYIIEELMLKRP IFRKTSVYGHFGREDPD----FLWERPKDLSHEKLSNNHNL
Trichomonas vaginalis G3 KNFDFLPYAIIRDLLRPIYQA TAAYGHFGRTDID----LPWEKVIKIF-----
Giardia lamblia DH\_A2 RTFGLTPGKIIQEYALDTP IFFNTSRYGHFGRSE-----FPWEQPRRLTLD-----
Giardia lamblia WB\_A1 RTFGLTPGKIIQEYALDTP IFFNTSRYGHFGRSE-----FPWEQPRRLTLD-----
Giardia lamblia Pig\_E KTFGLTPGKIIQEYSLDTP IFFNTSKYGHFGRPE-----FPWEQPRRLTLD-----
Giardia lamblia GS\_B RTFGLTPGKIIQEYGLDTP IFFNTSRYGHFGRPG-----LPWEQPRRLMLE-----

Naegleria gruberi strain NEG-M -----
Cryptosporidium hominis TU502 -----
Cryptosporidium parvum Iowa II -----
Leishmania infantum JPCM5 -----
Leishmania major strain Friedlin -----
Trypanosoma brucei gambiense DAL972 -----
Trypanosoma cruzi strain CL Brener -----
Plasmodium falciparum 3D7 LKN--
Plasmodium knowlesi strain H LKN--
Theileria annulata strain Ankara MTNGY
Theileria parva strain Muguga MVNGH
Trichomonas vaginalis G3 -----
Giardia lamblia DH\_A2 -----
Giardia lamblia WB\_A1 -----
Giardia lamblia Pig\_E -----
Giardia lamblia GS\_B -----

**Trios-Phosphate Isomerase**

1 10 20 30 40 50 60

| | | | | | |

Naegleria gruberi strain NEG-M -----  
Plasmodium falciparum 3D7 -----  
Plasmodium knowlesi strain H -----  
Cryptosporidium parvum Iowa II -----  
Cryptosporidium hominis TU502 -----  
Theileria parva strain Muguga -----MSN---  
Theileria annulata strain Ankara MEGNESISSLSMSKLVIGVNHHLNHTSMRSNHIFIHWLNYLINQSYYPYENWIIYGSSNNGV  
Trypanosoma brucei gambiense DAL972 -----  
Trypanosoma cruzi strain CL Brener -----  
Leishmania infantum JPCM5 -----  
Leishmania major strain Friedlin -----  
Giardia lamblia DH\_A2 -----  
Giardia lamblia WB\_A1 -----  
Giardia lamblia Pig\_E -----  
Giardia lamblia GS\_B -----  
Trichomonas vaginalis G3 -----

Naegleria gruberi strain NEG-M -----MRTPYIGGNWKCNGTVESIKQLVQDLNQGPESTEGKVE  
Plasmodium falciparum 3D7 -----MARKYFVAANWKCNGTLESIKSLTNSFNLDLDFPSKLD  
Plasmodium knowlesi strain H -----MTRKYFVSANWKCNGTQESIKALAASFNELEFDPKLD  
Cryptosporidium parvum Iowa II -----MSRKYFVGGNFKCNGTKESLKTLLIDSFQVESSNS--E  
Cryptosporidium hominis TU502 -----MSRKYFVGGNFKCNGTKESLKTLLIDSFQVESSNS--E  
Theileria parva strain Muguga -----RRKWLGGNWCNGGSKQISDLLAHFNLLKSKHNNLD  
Theileria annulata strain Ankara LTLQRKLLRCLIKRFIIFYLYKIKRWLGGNWCNGTKQISDLLLHFNHRHQTKNNLD  
Trypanosoma brucei gambiense DAL972 -----MSKPQPIAAANWKCNGSQSLSELIDLFN-ST SINHDVQ  
Trypanosoma cruzi strain CL Brener -----MASKPQPIAAANWKCNGSESLVPLIETLN-AATFDHDVQ  
Leishmania infantum JPCM5 -----MSSKPQPIAAANWKCNGTTASIEKLVQVLN-EHNISHDVQ  
Leishmania major strain Friedlin -----MSAKPQPIAAANWKCNGTTASIEKLVQVLN-EHNISHDVQ  
Giardia lamblia DH\_A2 -----MPARRPFIGGNFKCNGSLDFIKSHVAAIA-AHKIPDSVD  
Giardia lamblia WB\_A1 -----MPARRPFIGGNFKCNGSLDFIKSHVAAIA-AHKIPDSVD  
Giardia lamblia Pig\_E -----MPARRPFIGGNFKCNGSLDFIKSHVAAIA-AHKIPDSID  
Giardia lamblia GS\_B -----MPARRPFIGGNFKCNGSLDFIKSHVASIA-SYKIPESVD  
Trichomonas vaginalis G3 -----MRTFFVGGNWKANPKTVEEAekliemln-GAKVEGNVE

Naegleria gruberi strain NEG-M VIVAPSSIHIGLVQSLNLRK---DWKISAQNIVQEKNGGAFTEISASMLKDLGIDSTLL  
Plasmodium falciparum 3D7 VVVFVPSVHYDTRKLLQS----KFSTGIQNVSKFGNG-SYTGESVAEIAKDLNIEYVII  
Plasmodium knowlesi strain H VVVFVPSVHYELAKSLLKP----KFHTGIQNVSKYNG-SYTGESIAEIAKDLNIEYVII  
Cryptosporidium parvum Iowa II VYVFPTSLHISLVKEFFGNDHPGVFKIGSQNISCTGNG-AFTGEVSCMLKDMVDVDCSLV  
Cryptosporidium hominis TU502 VYVFPTSLHISLVKEFFGNDHPGVFKIGSQNISCTGNG-AFTGEVSCMLKDMIDVDCSLV  
Theileria parva strain Muguga VVLFPPSLYVEHTRNVLKT---GVFELGVQNVQSQSKSG-AFTGELSLPMFSDFLKWSLV  
Theileria annulata strain Ankara VVLFPPSLYVEHTRNELKS---EVFELGVQNVQSQSKSG-AFTGELSLTMFTDFGLKWSLV  
Trypanosoma brucei gambiense DAL972 CVVASTFVHLAMTKERLSHP---KFVIAAQNAIAKS-G-AFTGEVSLPILKDFGVNWIIVL  
Trypanosoma cruzi strain CL Brener CVVAPTFLHIPMTKARLTNP---KFQIAAQNAITRS-G-AFTGEVSLQILKDYGIKVVVL  
Leishmania infantum JPCM5 CVVAPTfVHIPLVQAKLRNP---KYAVSAENAIKSG-AFTGEVSMPIKDLGINWVIL  
Leishmania major strain Friedlin CVVAPTfVHIPLVQAKLRNP---KYVVAENAIKSG-AFTGEVSMPIKDLGINWVIL  
Giardia lamblia DH\_A2 VVIAPSAVHLSTAIJAANTS---QLRIAAQNVYLEGNG-AWTGETSVEMLQDMGLKHVIV  
Giardia lamblia WB\_A1 VVIAPSAVHLSTAIJAANTS---QLRIAAQNVYLEGNG-AWTGETSVEMLQDMGLKHVIV  
Giardia lamblia Pig\_E VVAPSVAHLSTAIJAANTS---QLKIAAQNVYLEGNG-AWTGETSVEMLQDMGLEVYVII  
Giardia lamblia GS\_B VVAPSVAHLSTAIJAANTS---CLKIAAQNVYLEGNG-AWTGETSVEMLLDMGLSHVYII  
Trichomonas vaginalis G3 VVVAAPFIFLPTLQK-LRK---DWKVAENVFTKPNG-AFTGEVTPMIKSFGEIWTIL

Naegleria gruberi strain NEG-M GHSERRHVFGESNTVIAKKVKVSEEVGLTIIGCVGETLEERERGETNQVITSQLKDFN--  
Plasmodium falciparum 3D7 GHFERRKYFHETDEDVREKLQASLKNLKAUVVCFGESLEQREKNKTIEVITKQVKAFVDL  
Plasmodium knowlesi strain H GHFERRKFFNETDEDVKEKLQQLCKNNLKVVVVCFGESLEQREKNQIDVIKKQVNSFVHL  
Cryptosporidium parvum Iowa II GHSERRQYSETDQIVNNKVKKGLEENGLKIVLCIGESLSERETGKTNDVIQKQLTEALKD  
Cryptosporidium hominis TU502 GHSERRQYSETDQIVNNKVKKGLEENGLKIVLCIGESLSERETGKTNDVIQKQLTEALKD  
Theileria parva strain Muguga GHSERRQLFNEDNFDVRAKVKMLQDNGVNAVVCFGETLSEREQQQTVNVLKRQLNAFVKD  
Theileria annulata strain Ankara GHSERRQLFNEDDSYVCEKVMMLQENGVNAVVCFGETLSEREQQQTVNVLKRQLDAFVKH  
Trypanosoma brucei gambiense DAL972 GHSERRAYGETNEIVADKVAAVAAGFMVIACIGETLQERESGRTAVVVLQIAAIAKK  
Trypanosoma cruzi strain CL Brener GHSERRLYGETNEIVAQKVAACAAGFHVIVCVGETNEEREAGRTAAVVLQLAAVAQK  
Leishmania infantum JPCM5 GHSERRTYGETDEIVAQKVADACKQGFVVIACIGETLQQREANQTAKVVLQTSIAIATK  
Leishmania major strain Friedlin GHSERRTYGETDEIVAQKVADACKQGFVVIACIGETLQQREANQTAKVVLQTSIAIATK  
Giardia lamblia DH\_A2 GHSERRRIMGETDEQSAKKAKRALEKGMTVIFCVGETLDERKANRTMEVNIAQLEALGKE  
Giardia lamblia WB\_A1 GHSERRRIMGETDEQSAKKAKRALEKGMTVIFCVGETLDERKANRTMEVNIAQLEALGKE  
Giardia lamblia Pig\_E GHSERRRIMGETDEQSAKKAKRALEKGMTVIFCVGETLDERKANRTMEVNIAQLEALSKE  
Giardia lamblia GS\_B GHSERRRIMGETNEQSAKKAKRALDKGMTVIFCTGETLDERKANNTMEVNIAQLEALKKE  
Trichomonas vaginalis G3 GHSERRDILKEDDEFLLAAKAKFALENGMKIYCCGEHLSEREAGKASEFVSAQIEKMIPA

Naegleria gruberi strain NEG-M ----VTNWDKFVIAIYEPVWAIIGTGTASPQQAQEAHKVLRDNLADNVNSEVAQKVRIIYG  
Plasmodium falciparum 3D7 ID----NFDNVILAYEPLWAIIGTGTATPEQAQLVHKEIRKIVKDTTCGEKQANQIRILYG  
Plasmodium knowlesi strain H IN----NFDNVVLAYEPIWAIIGTGTATPEQAQEVHKEIRNIVKEKCGEKNAQQIRILYG  
Cryptosporidium parvum Iowa II VS----DLSNLVIAIYEPWAIIGTGCVVATPGQAQEAHAFIREYVTRMYPNPQVSSNLRRIYG  
Cryptosporidium hominis TU502 VS----DLSNLVIAIYEPWAIIGTGCVVATPEQAQEAHAFIREYVTKMYSQVSSNLRRIYG  
Theileria parva strain Muguga VK----DWDKVVLAYEPVWAIIGTGKVVATVEQVNAHAFVREHVRGLAG-AVADKVRVYVG  
Theileria annulata strain Ankara VK----DWDKVVLAYEPVWAIIGTGKVVATVDQVKEAHKFVRDYVRGLVG-DVADKVRVYVG  
Trypanosoma brucei gambiense DAL972 LK--KADWAKVVIAYEPVWAIIGTGKVVATPQAQEAHALIRSWSSKIGADVAGELRILYG  
Trypanosoma cruzi strain CL Brener LS--KEAWAHVVIAYEPVWAIIGTGKVVATPQAQEAHELLRRWVRSKLGADIAAQLRILYG  
Leishmania infantum JPCM5 LP--KEAWDQIVLAYEPVWAIIGTGKVVATPEQAQEVHALLRKWVSEKIGADVAAARLRILYG  
Leishmania major strain Friedlin LP--KEAWDQIVLAYEPVWAIIGTGKVVATPEQAQEVHALLRKWVSEKIGTDVAAKLRILYG  
Giardia lamblia DH\_A2 LGESKMLWKEVVIAYEPVWSIGTGCVVATPEQAEEVHVGLRKWFAEKVCAEGAQHIRIYIG  
Giardia lamblia WB\_A1 LGESKMLWKEVVIAYEPVWSIGTGCVVATPEQAEEVHVGLRKWFAEKVCAEGAQHIRIYIG  
Giardia lamblia Pig\_E LGESKLLWKKVVIAYEPVWSIGTGCVVATPEQAEEVHVGLRKWFAEKVCAEGAQHIRIYIG  
Giardia lamblia GS\_B IGESKLLWENVVIAYEPVWSIGTGCVVATPEQAEEVHVGLRKWFAEKVCAEGAQHIRIYIG  
Trichomonas vaginalis G3 IP--AGKWDDVVIAYEPIWAIIGTGKVVATPQAQEMCKVIRDILAAGVADIANKVRILYG

Naegleria gruberi strain NEG-M GSVNSANSDELKQPDIDGFLVGGASLKSDFLSIVNSGLKSVE  
Plasmodium falciparum 3D7 GSVNTENCSSLIQQEDIDGFLVGNASLKE-SFVDIISAM----  
Plasmodium knowlesi strain H GSVNTENCASLIKQEDIDGFLVGNASLKP-SFVEIISAM----  
Cryptosporidium parvum Iowa II GSVTPDNCNELIKCADIDGFLVGGASLKP-TFAKIIESAQ----  
Cryptosporidium hominis TU502 GSVTPDNCNELIKCADIDGFLVGGASLKP-TFAKIIESAQ----  
Theileria parva strain Muguga GSVNEKNCHELAKCNDVDGFLVGGTSLKK-EFLDVLKSLEQ---  
Theileria annulata strain Ankara GSVNEKNCLELSKCSDDVDGFLVGGASLKK-EFLDILKSLE----  
Trypanosoma brucei gambiense DAL972 GSVNGKNARTLYQQRDVNGFLVGGASLKP-EFVDIIEATQ----  
Trypanosoma cruzi strain CL Brener GSVTAKNARTLYQMRDINGFLVGGASLKP-EFVEIIEATK----  
Leishmania infantum JPCM5 GSVSAGNAKTLYMKPDINGFLVGGASLKP-EFRDIIDATR----  
Leishmania major strain Friedlin GSVSAGNAKTLYMKPDINGFLVGGASLKP-EFRDIIDATR----  
Giardia lamblia DH\_A2 GSANGSNCEKLGQCPNIDGFLVGGASLKP-EFMTMIDILAKTRT  
Giardia lamblia WB\_A1 GSANGSNCEKLGQCPNIDGFLVGGASLKP-EFMTMIDILTKTRT  
Giardia lamblia Pig\_E GSANGSNCEKLGQCPNIDGFLVGGASLKP-EFMTMIDLLAKVRA  
Giardia lamblia GS\_B GSANGSNCEKLGQCPNIDGFLVGGASLKP-EFTTMIDILAKTRA  
Trichomonas vaginalis G3 GSVKPNNCNELAACPDVDGFLVGGASLEP-GFINIVNSNVHSK-

Alpha Tubulin

Table with 7 columns (1, 10, 20, 30, 40, 50, 60) and 25 rows of sequence data for various species including Naegleria gruberi, Leishmania infantum, and Trypanosoma brucei.

Table with 7 columns (1, 10, 20, 30, 40, 50, 60) and 25 rows of sequence data for various species including Naegleria gruberi, Leishmania infantum, and Trypanosoma brucei.

Table with 7 columns (1, 10, 20, 30, 40, 50, 60) and 25 rows of sequence data for various species including Naegleria gruberi, Leishmania infantum, and Trypanosoma brucei.

Table with 7 columns (1, 10, 20, 30, 40, 50, 60) and 25 rows of sequence data for various species including Naegleria gruberi, Leishmania infantum, and Trypanosoma brucei.

Table with 7 columns (1, 10, 20, 30, 40, 50, 60) and 25 rows of sequence data for various species including Naegleria gruberi, Leishmania infantum, and Trypanosoma brucei.

Table with 7 columns (1, 10, 20, 30, 40, 50, 60) and 25 rows of sequence data for various species including Naegleria gruberi, Leishmania infantum, and Trypanosoma brucei.

Table with 7 columns (1, 10, 20, 30, 40, 50, 60) and 25 rows of sequence data for various species including Naegleria gruberi, Leishmania infantum, and Trypanosoma brucei.

Table with 7 columns (1, 10, 20, 30, 40, 50, 60) and 25 rows of sequence data for various species including Naegleria gruberi, Leishmania infantum, and Trypanosoma brucei.

Table with 7 columns (1, 10, 20, 30, 40, 50, 60) and 25 rows of sequence data for various species including Naegleria gruberi, Leishmania infantum, and Trypanosoma brucei.
